# Supplementary material for: Targeting wild-type Erythrocyte receptors for Plasmodium falciparum and vivax Merozoites by Zinc Finger Nucleases In- silico: Towards a Genetic Vaccine against Malaria
Source: PubMed Central journal article supplement (PMC3500210; doi:10.1186/1479-0556-10-8), 2012-08-31
Supplement: 1479-0556-10-8-S1.pdf [file 1479-0556-10-8-S1.pdf]

- 
- Zinc Finger Site Type:** Array  
**Zinc Finger Engineering Method:** CoDA  
**Sequence Name:** Gene ID: 2532, HUMAN DARC Showing 2.49kb region from base 159173803 to 159176290.

**Sequence Length:**2,490

**Nucleotide Sequence**

```
:nCCCCCAGTAGAAATATGAATAGAAATCACCCCTGTGGGCAATGGT
CCCATTTTAAAATATGCTGTCCCATTGTCCCCTAGAGCCTACTTTAA
CTTGTCAGACCATGTATTCCACTTCATATGCAAGAGGCATGCACTG
AGCCCATAGGTGGCTAGGCAAACACCCAATAGCTCCCTGAAATGG
CTTCATTATGCAGCCTCGACAGCCACCCCAACCCTCCCCTCTCAC
ACTGAAACACCCAGACCTAGAGATAGCTAGACACACCCAGACACC
CGCCAAGCCCCTCACATACAGATATGTGCACAATGATACACAGCAA
ACGTACACAGAGTTCAGTACACACAAAGAGCTCACGCCACGTGC
ACACACCCCTCAGTTGGGACAGAGTTGACCACCACCACCTTTCTC
CCAAACACATGGCTTTTGAAGTGCCTTTCCTTGGATCCAGTTC AAG
GGGATGGAGGAGCAGTGAGAGTCAGCCGCCCTTCCACTCCAATTT
CCCAGCACCTCCCTTATCTCTGCCTCACAAGTCACCCAGCCCCCCT
CTCTTCCTTCCTTGTGCTTGAAGAATCTCTCCTTGCTGGAAAGCCC
CCTGTTTTCTCAATCTCCCTTTCCACTTCGGTAAAATCTCTACTTGC
TGGAAAGCCCCCTGTTTTCTCAATCTCCCTTTCCACTTCGGTAAAAT
GCCCACTTTCTGGTCCCCACCTTTTTCTGAGTGTAGTCCCAACCA
GCCAAATCCAACCTCAAACAGGAAGACCCAAGGCCAGTGACCCC
CATAGGCCTGAGGCTTGTGCAGGCAGTGGGCGTGGGGTAAGGCT
TCCTGATGCCCCCTGTCCCTGCCCAGAACCTGATGGCCCTCATT A
GTCCTTGGCTCTTATCTTGG AAGCACAGGCGCTGACAGCCGTC C
AGCCCTTCTGTCTGCGGGCCTGAACCAAACGGTGCCATGGGG AAC
TGTCTGCACAGGGTGAGTATGGGGCCAGGCCCCAGAGTCCCTT AT
CCCTATGCCCCCTCATTTCCCGTGCTGTTTGCCCTCAGTCTTTAT AT
CTCTTCCTTTTCTCCTCATCTTTTCTCCCTTCCTGCTTTTTTCT CT
TCCTTCAAAGTCTTTTTCTTCTCTCCTTCCTATGCTAGCCTCCTAG
CTCCCTCTTGTGTCCCTCCCTTTGCCTTTGAGTCAGTTCATCCTG
GTCTCTTGGTGCCTTTTTCTTCTGACCTTGCCTGCTCCTCCAGCC
CCAGCTGCCCTGGCTTCCCCAGGACTGTTCCCTGCTCCGGCTCTTC
AGGCTCCCTGCTTTGTCCCTTTTCCACTGTCCGCACTGCATCTGACT
CCTGCAGAGACCTTGTTCTCCACCCGACCTTCCTCTCTGTCCCTCC
CCTCCACCTGCCCTCAATTCCAGGAGACTCTTCCGGTGTA ACT
CTGATGGCCTCCTCTGGGTATGTCCCTCCAGGCGGAGCTCTCCCC
TCAACTGAGAACTCAAGTCAGCTGGACTTCGAAGATGTATGGAATT
```

CTTCCTATGGTGTGAATGATTCCTTCCCAGATGGAGACTATGGTGC  
 CAACCTGGAAGCAGCTGCCCCCTGCCACTCCTGTAACCTGCTGGA  
 TGACTCTGCACTGCCCTTCTTCATCCTCACCAGTGTCTGGGTATC  
 CTAGCTAGCAGCACTGTCCTCTTCATGCTTTTCAGACCTCTCTTCC  
 GCTGGCAGCTCTGCCCTGGCTGGCCTGTCCTGGCACAGCTGGCT  
 GTGGGCAGTGCCCTCTTCAGCATTGTGGTGCCCGTCTTGGCCCCA  
 GGGCTAGGTAGCACTCGCAGCTCTGCCCTGTGTAGCCTGGGCTAC  
 TGTGTCTGGTATGGCTCAGCCTTTGCCCAGGCTTTGCTGCTAGGG  
 TGCCATGCCTCCCTGGGCCACAGACTGGGTGCAGGCCAGGTCCC  
 AGGCCTCACCTGGGGCTCACTGTGGGAATTTGGGGAGTGGCTG  
 CCCTACTGACACTGCCTGTCACCCTGGCCAGTGGTGCTTCTGGTG  
 GACTCTGCACCCTGATATACAGCACGGAGCTGAAGGCTTTGCAGG  
 CCACACACACTGTAGCCTGTCTTGCCATCTTTGTCTTGTTGCCATT  
 GGGTTTGTGGAGCCAAGGGGCTGAAGAAGGCATTGGGTATGGG  
 GCCAGGCCCTGGATGAATATCCTGTGGGCCTGGTTTATTTTCTGG  
 TGGCCTCATGGGGTGGTTCTAGGACTGGATTTCTGGTGAGGTCC  
 AAGCTGTTGCTGTTGTCAACATGTCTGGCCCAGCAGGCTCTGGAC  
 CTGCTGCTGAACCTGGCAGAAGCCCTGGCAATTTTGCCTGTGTG  
 GCTACGCCCTGCTCCTCGCCCTATTCTGCCACCAGGCCACCCGC  
 ACCCTCTTGCCCTCTCTGCCCTCCCTGAAGGATGGTCTTCTCATC  
 TGGACACCCTTGGAAGCAAATCCTAGTTCTCTTCCCACCTGTCAAC  
 CTGAATTAAGTCTACACTGCCTTTGTGAAn

**Selected Module Sets:**

**Selected Module Count: 3**

**Ignore Asp Overlap: True**

The results below are zinc finger arrays that can be constructed using CoDA. Note that other methods (including modular assembly and OPEN) can also potentially be used to target the input sequence of interest.”

**Sort By:**

⊕ ZFA-unknown-1  
 117 tGAA GTGGA t 107  
 117 aCTTACCTa 107

| FINGER | HELIX   | TRIPLET | REFERENCE NUMBER | SOURCE |
|--------|---------|---------|------------------|--------|
| F1     | HKPNLHR | GAA     | -                | CoDA   |
| F2     | RREVLN  | GTG     | -                | CoDA   |

|    |         |     |   |      |
|----|---------|-----|---|------|
| F3 | QTVNLDR | GAA | - | CoDA |
|----|---------|-----|---|------|

ZF DNA Sequence

Bos taurus (cow) Build 3.1

Blast GAAGTGGAA

+ ZFA-unknown-2  
 124 aGAGGCATGCa 134  
 124 tCTCCGTACGt 134

| FINGER | HELIX   | TRIPLET | REFERENCE NUMBER | SOURCE |
|--------|---------|---------|------------------|--------|
| F1     | RNRNLVL | TGC     | -                | CoDA   |
| F2     | QSTTLKR | GCA     | -                | CoDA   |
| F3     | RGDNLNR | GAG     | -                | CoDA   |

ZF DNA Sequence

Bos taurus (cow) Build 3.1

Blast GAGGCATGC

+ ZFA-unknown-3  
 146 gGTGGCTAGGc 156  
 146 cCACCGATCCg 156

| FINGER | HELIX   | TRIPLET | REFERENCE NUMBER | SOURCE |
|--------|---------|---------|------------------|--------|
| F1     | RSSHLKM | AGG     | -                | CoDA   |
| F2     | QRSDLTR | GCT     | -                | CoDA   |
| F3     | RPDALPR | GTG     | -                | CoDA   |

ZF DNA Sequence

Bos taurus (cow) Build 3.1

Blast GTGGCTAGG

+ ZFA-unknown-4  
 151 cTAGGCAACa 161  
 151 gATCCGTTTg 161

| FINGER | HELIX   | TRIPLET | REFERENCE NUMBER | SOURCE |
|--------|---------|---------|------------------|--------|
| F1     | GHTALRN | AAC     | -                | CoDA   |

|    |         |     |   |      |
|----|---------|-----|---|------|
| F2 | QSTTLKR | GCA | - | CoDA |
| F3 | RRDGLAG | TAG | - | CoDA |

ZF DNA Sequence

Bos taurus (cow) Build 3.1

Blast TAGGCAAAC

⊕ ZFA-unknown-5  
 164 gGGTGTTCc 154  
 164 cCCACAAACGg 154

| FINGER | HELIX   | TRIPLET | REFERENCE NUMBER | SOURCE |
|--------|---------|---------|------------------|--------|
| F1     | RMRNLII | TGC     | -                | CoDA   |
| F2     | HKSSLTR | GTT     | -                | CoDA   |
| F3     | HGHRLKT | GGT     | -                | CoDA   |

ZF DNA Sequence

Bos taurus (cow) Build 3.1

Blast GGTGTTTGC

⊕ ZFA-unknown-6  
 200 cGAGGCTGCAt 190  
 200 gCTCCGACGTa 190

| FINGER | HELIX   | TRIPLET | REFERENCE NUMBER | SOURCE |
|--------|---------|---------|------------------|--------|
| F1     | HNGTLKR | GCA     | -                | CoDA   |
| F2     | QRSDLTR | GCT     | -                | CoDA   |
| F3     | RQDNLQR | GAG     | -                | CoDA   |

ZF DNA Sequence

Bos taurus (cow) Build 3.1

Blast GAGGCTGCA

⊕ ZFA-unknown-7  
 203 tGTCGAGGCTg 193  
 203 aCAGCTCCGAc 193

| FINGER | HELIX | TRIPLET | REFERENCE NUMBER | SOURCE |
|--------|-------|---------|------------------|--------|
|--------|-------|---------|------------------|--------|

|    |         |     |   |      |
|----|---------|-----|---|------|
| F1 | NKQALDR | GCT | - | CoDA |
| F2 | RQDNLGR | GAG | - | CoDA |
| F3 | DRTPLNR | GTC | - | CoDA |

ZF DNA Sequence

Bos taurus (cow) Build 3.1

Blast GTCGAGGCT

- + ZFA-unknown-8  
206 gGCTGTCGAGg 196  
206 cCGACAGCTCc 196

| FINGER | HELIX   | TRIPLET | REFERENCE NUMBER | SOURCE |
|--------|---------|---------|------------------|--------|
| F1     | RTHNLKR | GAG     | -                | CoDA   |
| F2     | DHSSLKR | GTC     | -                | CoDA   |
| F3     | VSNSLAR | GCT     | -                | CoDA   |

ZF DNA Sequence

Bos taurus (cow) Build 3.1

Blast GCTGTCGAG

- + ZFA-unknown-9  
209 gGTGGCTGTCg 199  
209 cCACCGACAGc 199

| FINGER | HELIX   | TRIPLET | REFERENCE NUMBER | SOURCE |
|--------|---------|---------|------------------|--------|
| F1     | TRAVLRR | GTC     | -                | CoDA   |
| F2     | QRSDLTR | GCT     | -                | CoDA   |
| F3     | RPDALPR | GTG     | -                | CoDA   |

ZF DNA Sequence

Bos taurus (cow) Build 3.1

Blast GTGGCTGTC

- + ZFA-unknown-10  
212 tGGGTTGGCTg 202  
212 aCCCCACCGAc 202

| FINGER | HELIX   | TRIPLET | REFERENCE NUMBER | SOURCE |
|--------|---------|---------|------------------|--------|
| F1     | TKPILVR | GCT     | -                | CoDA   |
| F2     | RREVLEN | GTG     | -                | CoDA   |
| F3     | RQGHLKR | GGG     | -                | CoDA   |

ZF DNA Sequence

Bos taurus (cow) Build 3.1

Blast GGGGTGGCT

+ ZFA-unknown-11  
 213 tTGGGTGGCt 203  
 213 aACCCACCGa 203

| FINGER | HELIX   | TRIPLET | REFERENCE NUMBER | SOURCE |
|--------|---------|---------|------------------|--------|
| F1     | VPSKLKR | GGC     | -                | CoDA   |
| F2     | EAHHLSR | GGT     | -                | CoDA   |
| F3     | RSDHLSL | TGG     | -                | CoDA   |

ZF DNA Sequence

Bos taurus (cow) Build 3.1

Blast TGGGTGGC

+ ZFA-unknown-12  
 215 gGTTGGGTGg 205  
 215 cCAACCCACc 205

| FINGER | HELIX   | TRIPLET | REFERENCE NUMBER | SOURCE |
|--------|---------|---------|------------------|--------|
| F1     | SRFTLGR | GTG     | -                | CoDA   |
| F2     | RREHLVR | GGG     | -                | CoDA   |
| F3     | INHSLRR | GTT     | -                | CoDA   |

ZF DNA Sequence

Bos taurus (cow) Build 3.1

Blast GTTGGGTG

+ ZFA-unknown-13  
 222 gTGGAGGGTt 212

222 cACCCTCCCAa 212

| FINGER | HELIX   | TRIPLET | REFERENCE NUMBER | SOURCE |
|--------|---------|---------|------------------|--------|
| F1     | TRQKLET | GGT     | -                | CoDA   |
| F2     | RQDNLGR | GAG     | -                | CoDA   |
| F3     | RMDHLAG | TGG     | -                | CoDA   |

[ZF DNA Sequence](#)

Bos taurus (cow) Build 3.1

Blast TGGGAGGGT

+ ZFA-unknown-14  
223 aGTGGGAGGGt 213  
223 tCACCTCCCA 213

| FINGER | HELIX   | TRIPLET | REFERENCE NUMBER | SOURCE |
|--------|---------|---------|------------------|--------|
| F1     | KKDHLHR | GGG     | -                | CoDA   |
| F2     | QSAHLKR | GGA     | -                | CoDA   |
| F3     | RNTALQH | GTG     | -                | CoDA   |

[ZF DNA Sequence](#)

Bos taurus (cow) Build 3.1

Blast GTGGGAGGG

+ ZFA-unknown-15  
245 gGTCTGGGTg 235  
245 cCAGACCACa 235

| FINGER | HELIX   | TRIPLET | REFERENCE NUMBER | SOURCE |
|--------|---------|---------|------------------|--------|
| F1     | RNFILQR | GTG     | -                | CoDA   |
| F2     | RREHLTI | TGG     | -                | CoDA   |
| F3     | DRSSLRR | GTC     | -                | CoDA   |

[ZF DNA Sequence](#)

Bos taurus (cow) Build 3.1

Blast GTCTGGGTG

+

ZFA-unknown-16  
264 gTGTGTCTAGc 254  
264 cACACAGATCg 254

| FINGER | HELIX   | TRIPLET | REFERENCE NUMBER | SOURCE |
|--------|---------|---------|------------------|--------|
| F1     | RGTNLRT | TAG     | -                | CoDA   |
| F2     | DHSSLKR | GTC     | -                | CoDA   |
| F3     | QPHGLAH | TGT     | -                | CoDA   |

#### ZF DNA Sequence

Bos taurus (cow) Build 3.1

Blast TGTGTCTAG

+ ZFA-unknown-17  
268 cTGGGTGTGTc 258  
268 gACCCACACAg 258

| FINGER | HELIX   | TRIPLET | REFERENCE NUMBER | SOURCE |
|--------|---------|---------|------------------|--------|
| F1     | RRQALEY | TGT     | -                | CoDA   |
| F2     | RREVLEN | GTG     | -                | CoDA   |
| F3     | RRDHLSL | TGG     | -                | CoDA   |

#### ZF DNA Sequence

Bos taurus (cow) Build 3.1

Blast TGGGTGTGT

+ ZFA-unknown-18  
271 tGCTGGGTgt 261  
271 aCAGACCCACa 261

| FINGER | HELIX   | TRIPLET | REFERENCE NUMBER | SOURCE |
|--------|---------|---------|------------------|--------|
| F1     | RNFILQR | GTG     | -                | CoDA   |
| F2     | RREHLTI | TGG     | -                | CoDA   |
| F3     | DRSSLRR | GTC     | -                | CoDA   |

#### ZF DNA Sequence

Bos taurus (cow) Build 3.1

Blast GTCTGGGTG



⊕ ZFA-unknown-19  
277 gGCGGGTGTc 267  
277 cGCCCCACAGa 267

| FINGER | HELIX    | TRIPLET | REFERENCE NUMBER | SOURCE |
|--------|----------|---------|------------------|--------|
| F1     | TRAVLRR  | GTC     | -                | CoDA   |
| F2     | EAHHLRSR | GGT     | -                | CoDA   |
| F3     | RLDMLAR  | GCG     | -                | CoDA   |

#### ZF DNA Sequence

Bos taurus (cow) Build 3.1

Blast GCGGGTGT

⊕ ZFA-unknown-20  
278 tGGCGGGTGTc 268  
278 aCCGCCACAG 268

| FINGER | HELIX    | TRIPLET | REFERENCE NUMBER | SOURCE |
|--------|----------|---------|------------------|--------|
| F1     | RKQHLTL  | TGT     | -                | CoDA   |
| F2     | RREHLVLR | GGG     | -                | CoDA   |
| F3     | ESGHLKR  | GGC     | -                | CoDA   |

#### ZF DNA Sequence

Bos taurus (cow) Build 3.1

Blast GGCGGGTGT

⊕ ZFA-unknown-21  
290 aTGTGAGGGc 280  
290 tACACTCCCCg 280

| FINGER | HELIX   | TRIPLET | REFERENCE NUMBER | SOURCE |
|--------|---------|---------|------------------|--------|
| F1     | RNTHLAR | GGG     | -                | CoDA   |
| F2     | RQDNLGR | GAG     | -                | CoDA   |
| F3     | QQHGLRH | TGT     | -                | CoDA   |

#### ZF DNA Sequence

Bos taurus (cow) Build 3.1

Blast TGTGAGGGG

⊕ ZFA-unknown-22  
361 cGTGGGCGTga 351  
361 gCACCCGCAct 351

| FINGER | HELIX   | TRIPLET | REFERENCE NUMBER | SOURCE |
|--------|---------|---------|------------------|--------|
| F1     | SRFTLGR | TGT     | -                | CoDA   |
| F2     | LKEHLTR | GGC     | -                | CoDA   |
| F3     | RKDALHV | GTG     | -                | CoDA   |

ZF DNA Sequence

Bos taurus (cow) Build 3.1

Blast GTGGGCGTG

⊕ ZFA-unknown-23  
374 aGGGGTGTGTg 364  
374 tCCCCACACac 364

| FINGER | HELIX   | TRIPLET | REFERENCE NUMBER | SOURCE |
|--------|---------|---------|------------------|--------|
| F1     | RRQALEY | TGT     | -                | CoDA   |
| F2     | RREVLEN | GTG     | -                | CoDA   |
| F3     | RQGHLKR | GGG     | -                | CoDA   |

ZF DNA Sequence

Bos taurus (cow) Build 3.1

Blast GGGTGTGT

⊕ ZFA-unknown-24  
376 tGAGGGTGTg 366  
376 aTCCCCACAc 366

| FINGER | HELIX   | TRIPLET | REFERENCE NUMBER | SOURCE |
|--------|---------|---------|------------------|--------|
| F1     | RKQHLTL | TGT     | -                | CoDA   |
| F2     | RREHLVR | GGG     | -                | CoDA   |
| F3     | RRDNLRL | GAG     | -                | CoDA   |

ZF DNA Sequence

Bos taurus (cow) Build 3.1

Blast GAGGGGTGT

⊕ ZFA-unknown-25  
 400 gGTGGTGGTCa 390  
 400 cCACCACCAGt 390

| FINGER | HELIX   | TRIPLET | REFERENCE NUMBER | SOURCE |
|--------|---------|---------|------------------|--------|
| F1     | TMAVLR  | GTC     | -                | CoDA   |
| F2     | RREVLEN | GTG     | -                | CoDA   |
| F3     | RKDALHV | GTG     | -                | CoDA   |

[ZF DNA Sequence](#)

Bos taurus (cow) Build 3.1

Blast GTGGTGGTC

⊕ ZFA-unknown-26  
 401 tGGTGGTGGTC 391  
 401 aCACCACCAG 391

| FINGER | HELIX   | TRIPLET | REFERENCE NUMBER | SOURCE |
|--------|---------|---------|------------------|--------|
| F1     | MKHHLAR | GGT     | -                | CoDA   |
| F2     | EAHHLR  | GGT     | -                | CoDA   |
| F3     | IRHHLKR | GGT     | -                | CoDA   |

[ZF DNA Sequence](#)

Bos taurus (cow) Build 3.1

Blast GGTGGTGGT

⊕ ZFA-unknown-27  
 403 gGTGGTGGTGg 393  
 403 cCACCACCACc 393

| FINGER | HELIX   | TRIPLET | REFERENCE NUMBER | SOURCE |
|--------|---------|---------|------------------|--------|
| F1     | RNFVLAR | GTG     | -                | CoDA   |
| F2     | RREVLEN | GTG     | -                | CoDA   |
| F3     | RKDALHV | GTG     | -                | CoDA   |

[ZF DNA Sequence](#)

Bos taurus (cow) Build 3.1

Blast GTGGTGGTG

ZFA-unknown-28  
 404 aGGTGGTGGTg 394  
 404 tCCACCACCAC 394

| FINGER | HELIX   | TRIPLET | REFERENCE NUMBER | SOURCE |
|--------|---------|---------|------------------|--------|
| F1     | MKHHLAR | GGT     | -                | CoDA   |
| F2     | EAHHLSR | GGT     | -                | CoDA   |
| F3     | IRHHLKR | GGT     | -                | CoDA   |

[ZF DNA Sequence](#)

Bos taurus (cow) Build 3.1

Blast GGTGGTGGT

ZFA-unknown-29  
 411 gGGAGAAAGGt 401  
 411 cCCTCTTTCCa 401

| FINGER | HELIX   | TRIPLET | REFERENCE NUMBER | SOURCE |
|--------|---------|---------|------------------|--------|
| F1     | RMAHLHA | AGG     | -                | CoDA   |
| F2     | QQTNLTR | GAA     | -                | CoDA   |
| F3     | QTTHLSR | GGA     | -                | CoDA   |

[ZF DNA Sequence](#)

Bos taurus (cow) Build 3.1

Blast GGAGAAAGG

ZFA-unknown-30  
 454 aGGGGATGGAg 464  
 454 tCCCCTACCTc 464

| FINGER | HELIX   | TRIPLET | REFERENCE NUMBER | SOURCE |
|--------|---------|---------|------------------|--------|
| F1     | DKTKLRV | GGA     | -                | CoDA   |
| F2     | VRHNLTR | GAT     | -                | CoDA   |
| F3     | RGDKLGP | GGG     | -                | CoDA   |

### ZF DNA Sequence

Bos taurus (cow) Build 3.1

Blast GGGGATGGA

+ ZFA-unknown-31  
457 gGATGGAGGAg 467  
457 cCTACCTCCTc 467

| FINGER | HELIX   | TRIPLET | REFERENCE NUMBER | SOURCE |
|--------|---------|---------|------------------|--------|
| F1     | RTDRLIR | GGA     | -                | CoDA   |
| F2     | QSAHLKR | GGA     | -                | CoDA   |
| F3     | ISHNLAR | GAT     | -                | CoDA   |

### ZF DNA Sequence

Bos taurus (cow) Build 3.1

Blast GATGGAGGA

+ ZFA-unknown-32  
460 tGGAGGAGCAg 470  
460 aCCTCCTCGTc 470

| FINGER | HELIX   | TRIPLET | REFERENCE NUMBER | SOURCE |
|--------|---------|---------|------------------|--------|
| F1     | KNTRLSV | GCA     | -                | CoDA   |
| F2     | QSAHLKR | GGA     | -                | CoDA   |
| F3     | QMSHLKR | GGA     | -                | CoDA   |

### ZF DNA Sequence

Bos taurus (cow) Build 3.1

Blast GGAGGAGCA

+ ZFA-unknown-33  
463 aGGAGCAGTga 473  
463 tCCTCGTCAcT 473

| FINGER | HELIX   | TRIPLET | REFERENCE NUMBER | SOURCE |
|--------|---------|---------|------------------|--------|
| F1     | RSHILTN | GTG     | -                | CoDA   |
| F2     | QSTTLKR | GCA     | -                | CoDA   |

|    |         |     |   |      |
|----|---------|-----|---|------|
| F3 | QKPHLSR | GGA | - | CoDA |
|----|---------|-----|---|------|

ZF DNA Sequence

Bos taurus (cow) Build 3.1

Blast GGAGCAGTG

- + ZFA-unknown-34  
485 gCGGCTGACT 475  
485 cCGCCGACTGa 475

| FINGER | HELIX   | TRIPLET | REFERENCE NUMBER | SOURCE |
|--------|---------|---------|------------------|--------|
| F1     | DLSNLKR | GAC     | -                | CoDA   |
| F2     | QRSDLTR | GCT     | -                | CoDA   |
| F3     | RLDMLAR | GCG     | -                | CoDA   |

ZF DNA Sequence

Bos taurus (cow) Build 3.1

Blast GCGGCTGAC

- + ZFA-unknown-35  
493 aGTGGAAGGGc 483  
493 tCACCTTCCCg 483

| FINGER | HELIX   | TRIPLET | REFERENCE NUMBER | SOURCE |
|--------|---------|---------|------------------|--------|
| F1     | KRERLDR | GGG     | -                | CoDA   |
| F2     | QQTNLTR | GAA     | -                | CoDA   |
| F3     | RNVALGN | GTG     | -                | CoDA   |

ZF DNA Sequence

Bos taurus (cow) Build 3.1

Blast GTGGAAGGG

- + ZFA-unknown-36  
496 tGGAGTGGAAG 486  
496 aCCTCACCTTc 486

| FINGER | HELIX   | TRIPLET | REFERENCE NUMBER | SOURCE |
|--------|---------|---------|------------------|--------|
| F1     | HKPNLHR | GAA     | -                | CoDA   |

|    |         |     |   |      |
|----|---------|-----|---|------|
| F2 | RREVLN  | GTG | - | CoDA |
| F3 | QKPHLSR | GGA | - | CoDA |

ZF DNA Sequence

Bos taurus (cow) Build 3.1

Blast GGAGTGGAA

⊕ ZFA-unknown-37  
 510 aGGTGCTGGGa 500  
 510 tCCACGACCct 500

| FINGER | HELIX   | TRIPLET | REFERENCE NUMBER | SOURCE |
|--------|---------|---------|------------------|--------|
| F1     | KKDHLHR | GGG     | -                | CoDA   |
| F2     | QRSDLTR | GCT     | -                | CoDA   |
| F3     | HGHRLKT | GGT     | -                | CoDA   |

ZF DNA Sequence

Bos taurus (cow) Build 3.1

Blast GGTGCTGGG

⊕ ZFA-unknown-38  
 513 gGGAGGTGCTg 503  
 513 cCCTCCACGAc 503

| FINGER | HELIX   | TRIPLET | REFERENCE NUMBER | SOURCE |
|--------|---------|---------|------------------|--------|
| F1     | LRQTLAR | GCT     | -                | CoDA   |
| F2     | EAHHLRS | GGT     | -                | CoDA   |
| F3     | QNSHLRR | GGA     | -                | CoDA   |

ZF DNA Sequence

Bos taurus (cow) Build 3.1

Blast GGAGGTGCT

⊕ ZFA-unknown-39  
 527 tGAGGCAGAGa 517  
 527 aCTCCGTCTct 517

| FINGER | HELIX | TRIPLET | REFERENCE NUMBER | SOURCE |
|--------|-------|---------|------------------|--------|
|--------|-------|---------|------------------|--------|

|    |         |     |   |      |
|----|---------|-----|---|------|
| F1 | KHSNLR  | GAG | - | CoDA |
| F2 | QSTTLKR | GCA | - | CoDA |
| F3 | RGDNLNR | GAG | - | CoDA |

ZF DNA Sequence

Bos taurus (cow) Build 3.1

Blast GAGGCAGAG

+ ZFA-unknown-40  
 530 tTGTGAGGCAg 520  
 530 aCACTCCGTc 520

| FINGER | HELIX   | TRIPLET | REFERENCE NUMBER | SOURCE |
|--------|---------|---------|------------------|--------|
| F1     | RRVDLLR | GCA     | -                | CoDA   |
| F2     | RQDNLGR | GAG     | -                | CoDA   |
| F3     | QQHGLRH | TGT     | -                | CoDA   |

ZF DNA Sequence

Bos taurus (cow) Build 3.1

Blast TGTGAGGCA

+ ZFA-unknown-41  
 542 gGGCTGGGTga 532  
 542 cCCGACCCAct 532

| FINGER | HELIX   | TRIPLET | REFERENCE NUMBER | SOURCE |
|--------|---------|---------|------------------|--------|
| F1     | RNFILQR | GTG     | -                | CoDA   |
| F2     | RREHLTI | TGG     | -                | CoDA   |
| F3     | EKSHLTR | GGC     | -                | CoDA   |

ZF DNA Sequence

Bos taurus (cow) Build 3.1

Blast GGCTGGGTG

+ ZFA-unknown-42  
 544 gGGGCTGGgt 534  
 544 cCCCCACCCa 534



| FINGER | HELIX   | TRIPLET | REFERENCE NUMBER | SOURCE |
|--------|---------|---------|------------------|--------|
| F1     | KKDHLHR | GGG     | -                | CoDA   |
| F2     | QRSDLTR | GCT     | -                | CoDA   |
| F3     | RTEHLAR | GGG     | -                | CoDA   |

ZF DNA Sequence

Bos taurus (cow) Build 3.1

Blast GGGGCTGGG

+ ZFA-unknown-43  
 548 aGAGGGGGGct 538  
 548 tCTCCCCCGa 538

| FINGER | HELIX    | TRIPLET | REFERENCE NUMBER | SOURCE |
|--------|----------|---------|------------------|--------|
| F1     | TNSKLTR  | GGC     | -                | CoDA   |
| F2     | RREHLVR  | GGG     | -                | CoDA   |
| F3     | RRDNLRLR | GAG     | -                | CoDA   |

ZF DNA Sequence

Bos taurus (cow) Build 3.1

Blast GAGGGGGGC

+ ZFA-unknown-44  
 619 aGTGGAAAGGg 609  
 619 tCACCTTTCc 609

| FINGER | HELIX   | TRIPLET | REFERENCE NUMBER | SOURCE |
|--------|---------|---------|------------------|--------|
| F1     | RMAHLHA | AGG     | -                | CoDA   |
| F2     | QQTNLTR | GAA     | -                | CoDA   |
| F3     | RNVALGN | GTG     | -                | CoDA   |

ZF DNA Sequence

Bos taurus (cow) Build 3.1

Blast GTGGAAAGG

+ ZFA-unknown-45  
 622 cGAAGTGGAa 612

622 gCTTCACCTTt 612

| FINGER | HELIX   | TRIPLET | REFERENCE NUMBER | SOURCE |
|--------|---------|---------|------------------|--------|
| F1     | HKPNLHR | GAA     | -                | CoDA   |
| F2     | RREVLEN | GTG     | -                | CoDA   |
| F3     | QTVNLDR | GAA     | -                | CoDA   |

[ZF DNA Sequence](#)

Bos taurus (cow) Build 3.1

Blast GAAGTGGAA

+ ZFA-unknown-46  
676 aGTGGAAAGGg 666  
676 tCACCTTCCc 666

| FINGER | HELIX   | TRIPLET | REFERENCE NUMBER | SOURCE |
|--------|---------|---------|------------------|--------|
| F1     | RMAHLHA | AGG     | -                | CoDA   |
| F2     | QQTNLTR | GAA     | -                | CoDA   |
| F3     | RNVALGN | GTG     | -                | CoDA   |

[ZF DNA Sequence](#)

Bos taurus (cow) Build 3.1

Blast GTGGAAAGG

+ ZFA-unknown-47  
679 cGAAGTGGAAa 669  
679 gCTTCACCTTt 669

| FINGER | HELIX   | TRIPLET | REFERENCE NUMBER | SOURCE |
|--------|---------|---------|------------------|--------|
| F1     | HKPNLHR | GAA     | -                | CoDA   |
| F2     | RREVLEN | GTG     | -                | CoDA   |
| F3     | QTVNLDR | GAA     | -                | CoDA   |

[ZF DNA Sequence](#)

Bos taurus (cow) Build 3.1

Blast GAAGTGGAA

+

ZFA-unknown-48  
708 aGGTGGGACc 698  
708 tCCACCCCTGg 698

| FINGER | HELIX   | TRIPLET | REFERENCE NUMBER | SOURCE |
|--------|---------|---------|------------------|--------|
| F1     | EEANLRR | GAC     | -                | CoDA   |
| F2     | RREHLVR | GGG     | -                | CoDA   |
| F3     | VDHHLRR | GGT     | -                | CoDA   |

#### ZF DNA Sequence

Bos taurus (cow) Build 3.1

Blast GGTGGGGAC

+ ZFA-unknown-49  
748 tGAGGTTGGA 738  
748 aCTCCAACCTa 738

| FINGER | HELIX   | TRIPLET | REFERENCE NUMBER | SOURCE |
|--------|---------|---------|------------------|--------|
| F1     | RSTHLRV | GGA     | -                | CoDA   |
| F2     | HKSSLTR | GTT     | -                | CoDA   |
| F3     | RHDQLTR | GAG     | -                | CoDA   |

#### ZF DNA Sequence

Bos taurus (cow) Build 3.1

Blast GAGGTTGGA

+ ZFA-unknown-50  
786 tGAGGCTTGTg 796  
786 aTCCGAACAc 796

| FINGER | HELIX   | TRIPLET | REFERENCE NUMBER | SOURCE |
|--------|---------|---------|------------------|--------|
| F1     | KRQHLEY | TGT     | -                | CoDA   |
| F2     | QRSDLTR | GCT     | -                | CoDA   |
| F3     | RQDNLQR | GAG     | -                | CoDA   |

#### ZF DNA Sequence

Bos taurus (cow) Build 3.1

Blast GAGGCTTGT

+ ZFA-unknown-51  
792 tTGTGCAGGCa 802  
792 aACACGTCCGt 802

| FINGER | HELIX   | TRIPLET | REFERENCE NUMBER | SOURCE |
|--------|---------|---------|------------------|--------|
| F1     | VPSKLLR | GGC     | -                | CoDA   |
| F2     | QSTTLKR | GCA     | -                | CoDA   |
| F3     | QAHGLTA | TGT     | -                | CoDA   |

#### ZF DNA Sequence

Bos taurus (cow) Build 3.1

Blast TGTGCAGGC

+ ZFA-unknown-52  
799 gGCAGTGGGcg 809  
799 cCGTCACCCGc 809

| FINGER | HELIX   | TRIPLET | REFERENCE NUMBER | SOURCE |
|--------|---------|---------|------------------|--------|
| F1     | SPSKLVR | GGC     | -                | CoDA   |
| F2     | RREVLEN | GTG     | -                | CoDA   |
| F3     | QGGTLRR | GCA     | -                | CoDA   |

#### ZF DNA Sequence

Bos taurus (cow) Build 3.1

Blast GCAGTGGGC

+ ZFA-unknown-53  
802 aGTGGGCGTg 812  
802 tCACCCGCACc 812

| FINGER | HELIX   | TRIPLET | REFERENCE NUMBER | SOURCE |
|--------|---------|---------|------------------|--------|
| F1     | SRFTLGR | GTG     | -                | CoDA   |
| F2     | LKEHLTR | GGC     | -                | CoDA   |
| F3     | RKDALHV | GTG     | -                | CoDA   |

#### ZF DNA Sequence

Bos taurus (cow) Build 3.1

Blast GTGGGCGTG

⊕ ZFA-unknown-54  
810 tGGGTAAGGc 820  
810 aCCCCATTCCg 820

| FINGER | HELIX   | TRIPLET | REFERENCE NUMBER | SOURCE |
|--------|---------|---------|------------------|--------|
| F1     | RRAHLRQ | AGG     | -                | CoDA   |
| F2     | QRSSLVR | GTA     | -                | CoDA   |
| F3     | RTEHLAR | GGG     | -                | CoDA   |

ZF DNA Sequence

Bos taurus (cow) Build 3.1

Blast GGGTAAGG

⊕ ZFA-unknown-55  
847 cTGGCAGGGa 837  
847 gACCCGTCCct 837

| FINGER | HELIX   | TRIPLET | REFERENCE NUMBER | SOURCE |
|--------|---------|---------|------------------|--------|
| F1     | RRAHLQN | GGG     | -                | CoDA   |
| F2     | QSTTLKR | GCA     | -                | CoDA   |
| F3     | RSDHLSL | TGG     | -                | CoDA   |

ZF DNA Sequence

Bos taurus (cow) Build 3.1

Blast TGGCAGGG

⊕ ZFA-unknown-56  
893 aGGCGTGACa 903  
893 tCCGCGACTgt 903

| FINGER | HELIX   | TRIPLET | REFERENCE NUMBER | SOURCE |
|--------|---------|---------|------------------|--------|
| F1     | DLSNLKR | GAC     | -                | CoDA   |
| F2     | QRSDLTR | GCT     | -                | CoDA   |
| F3     | ESGHLRR | GGC     | -                | CoDA   |

ZF DNA Sequence

Bos taurus (cow) Build 3.1

Blast GCGCTGAC

⊕ ZFA-unknown-57  
 913 cTGGGACGGct 903  
 913 gACCCTGCCGa 903

| FINGER | HELIX   | TRIPLET | REFERENCE NUMBER | SOURCE |
|--------|---------|---------|------------------|--------|
| F1     | APSKLDR | GGC     | -                | CoDA   |
| F2     | DRGNLTR | GAC     | -                | CoDA   |
| F3     | RSDHLSL | TGG     | -                | CoDA   |

[ZF DNA Sequence](#)

Bos taurus (cow) Build 3.1

Blast TGGGACGGC

⊕ ZFA-unknown-58  
 915 gGCTGGGACGg 905  
 915 cCGACCCTGCc 905

| FINGER | HELIX   | TRIPLET | REFERENCE NUMBER | SOURCE |
|--------|---------|---------|------------------|--------|
| F1     | KNNDLTR | ACG     | -                | CoDA   |
| F2     | RREHLVR | GGG     | -                | CoDA   |
| F3     | VSNLAR  | GCT     | -                | CoDA   |

[ZF DNA Sequence](#)

Bos taurus (cow) Build 3.1

Blast GCTGGGACG

⊕ ZFA-unknown-59  
 967 cTGTGCAGACa 957  
 967 gACACGTCTGt 957

| FINGER | HELIX   | TRIPLET | REFERENCE NUMBER | SOURCE |
|--------|---------|---------|------------------|--------|
| F1     | EEVNLRR | GAC     | -                | CoDA   |
| F2     | QSTTLKR | GCA     | -                | CoDA   |
| F3     | QAHGLTA | TGT     | -                | CoDA   |

[ZF DNA Sequence](#)

Bos taurus (cow) Build 3.1

Blast TGTGCAGAC

⊕ ZFA-unknown-60  
1013 aGGGGCATAGg 1003  
1013 tCCCCGTATCc 1003

| FINGER | HELIX   | TRIPLET | REFERENCE NUMBER | SOURCE |
|--------|---------|---------|------------------|--------|
| F1     | RSHNLKL | TAG     | -                | CoDA   |
| F2     | QSTTLKR | GCA     | -                | CoDA   |
| F3     | RTEHLAR | GGG     | -                | CoDA   |

[ZF DNA Sequence](#)

Bos taurus (cow) Build 3.1

Blast GGGGCATAG

⊕ ZFA-unknown-61  
1023 tGCTGTTGc 1033  
1023 aCGACAAACGg 1033

| FINGER | HELIX   | TRIPLET | REFERENCE NUMBER | SOURCE |
|--------|---------|---------|------------------|--------|
| F1     | RMRNLII | TGC     | -                | CoDA   |
| F2     | HKSSLTR | GTT     | -                | CoDA   |
| F3     | VSNTLTR | GCT     | -                | CoDA   |

[ZF DNA Sequence](#)

Bos taurus (cow) Build 3.1

Blast GCTGTTTGC

⊕ ZFA-unknown-62  
1036 aGGGGCAACa 1026  
1036 tCCCCGTTTgt 1026

| FINGER | HELIX   | TRIPLET | REFERENCE NUMBER | SOURCE |
|--------|---------|---------|------------------|--------|
| F1     | GHTALRN | AAC     | -                | CoDA   |
| F2     | QSTTLKR | GCA     | -                | CoDA   |
| F3     | RTEHLAR | GGG     | -                | CoDA   |

### ZF DNA Sequence

Bos taurus (cow) Build 3.1

Blast GGGGCAAAC

+ ZFA-unknown-63  
1067 tGAGGAGGAAa 1057  
1067 aCTCCTCCTt 1057

| FINGER | HELIX   | TRIPLET | REFERENCE NUMBER | SOURCE |
|--------|---------|---------|------------------|--------|
| F1     | QASNLLR | GAA     | -                | CoDA   |
| F2     | RQDNLGR | GAG     | -                | CoDA   |
| F3     | RVDNLPR | GAG     | -                | CoDA   |

### ZF DNA Sequence

Bos taurus (cow) Build 3.1

Blast GAGGAGGAA

+ ZFA-unknown-64  
1070 aGATGAGGAGg 1060  
1070 tCTACTCCTCc 1060

| FINGER | HELIX     | TRIPLET | REFERENCE NUMBER | SOURCE |
|--------|-----------|---------|------------------|--------|
| F1     | RQMNLDLDR | GAG     | -                | CoDA   |
| F2     | RQDNLGR   | GAG     | -                | CoDA   |
| F3     | LNSNLAR   | GAT     | -                | CoDA   |

### ZF DNA Sequence

Bos taurus (cow) Build 3.1

Blast GATGAGGAG

+ ZFA-unknown-65  
1086 aGCAAGGAAGGg 1076  
1086 tCGTCCTTCCc 1076

| FINGER | HELIX   | TRIPLET | REFERENCE NUMBER | SOURCE |
|--------|---------|---------|------------------|--------|
| F1     | RPHHLDA | AGG     | -                | CoDA   |
| F2     | QSAHLKR | GGA     | -                | CoDA   |



|    |         |     |   |      |
|----|---------|-----|---|------|
| F3 | QDVSLVR | GCA | - | CoDA |
|----|---------|-----|---|------|

ZF DNA Sequence

Bos taurus (cow) Build 3.1

Blast GCAGGAAGG

+ ZFA-unknown-66  
 1099 gGAA GAGGAAa 1089  
 1099 cCTTCTCCTTt 1089

| FINGER | HELIX   | TRIPLET | REFERENCE NUMBER | SOURCE |
|--------|---------|---------|------------------|--------|
| F1     | QASNLLR | GAA     | -                | CoDA   |
| F2     | RQDNLGR | GAG     | -                | CoDA   |
| F3     | QRNNLGR | GAA     | -                | CoDA   |

ZF DNA Sequence

Bos taurus (cow) Build 3.1

Blast GAAGAGGAA

+ ZFA-unknown-67  
 1127 gGAA GGAGAGa 1117  
 1127 cCTTCCTCTc 1117

| FINGER | HELIX   | TRIPLET | REFERENCE NUMBER | SOURCE |
|--------|---------|---------|------------------|--------|
| F1     | KHSNLTR | GAG     | -                | CoDA   |
| F2     | QSAHLKR | GGA     | -                | CoDA   |
| F3     | LGENLRR | GAA     | -                | CoDA   |

ZF DNA Sequence

Bos taurus (cow) Build 3.1

Blast GAAGGAGAG

+ ZFA-unknown-68  
 1130 aTAG GAAGGAg 1120  
 1130 tATCCTTCCTc 1120

| FINGER | HELIX   | TRIPLET | REFERENCE NUMBER | SOURCE |
|--------|---------|---------|------------------|--------|
| F1     | RMERLDR | GGA     | -                | CoDA   |

|    |         |     |   |      |
|----|---------|-----|---|------|
| F2 | QQTNLTR | GAA | - | CoDA |
| F3 | RRDHLSL | TAG | - | CoDA |

ZF DNA Sequence

Bos taurus (cow) Build 3.1

Blast TAGGAAGGA

- ZFA-unknown-69  
1143 cTAGGAGGCTa 1133  
1143 gATCCTCCGAt 1133

| FINGER | HELIX   | TRIPLET | REFERENCE NUMBER | SOURCE |
|--------|---------|---------|------------------|--------|
| F1     | NKQALDR | GCT     | -                | CoDA   |
| F2     | RQDNLGR | GAG     | -                | CoDA   |
| F3     | RPESLRP | TAG     | -                | CoDA   |

ZF DNA Sequence

Bos taurus (cow) Build 3.1

Blast TAGGAGGCT

- ZFA-unknown-70  
1151 aGAGGGAGCTa 1141  
1151 tCTCCCTCGAt 1141

| FINGER | HELIX   | TRIPLET | REFERENCE NUMBER | SOURCE |
|--------|---------|---------|------------------|--------|
| F1     | TTQALRR | GCT     | -                | CoDA   |
| F2     | QSAHLKR | GGA     | -                | CoDA   |
| F3     | VHWNLMR | GAG     | -                | CoDA   |

ZF DNA Sequence

Bos taurus (cow) Build 3.1

Blast GAGGGAGCT

- ZFA-unknown-71  
1229 aGGAGCAGTgc 1219  
1229 tCCTCGTCACg 1219

| FINGER | HELIX | TRIPLET | REFERENCE NUMBER | SOURCE |
|--------|-------|---------|------------------|--------|
|--------|-------|---------|------------------|--------|

|    |         |     |   |      |
|----|---------|-----|---|------|
| F1 | RSHILTN | GTG | - | CoDA |
| F2 | QSTTLKR | GCA | - | CoDA |
| F3 | QKPHLSR | GGA | - | CoDA |

ZF DNA Sequence

Bos taurus (cow) Build 3.1

Blast GGAGCAGTG

+ ZFA-unknown-72  
 1232 tGGAGGAGCAg 1222  
 1232 aCCTCCTCGTc 1222

| FINGER | HELIX    | TRIPLET | REFERENCE NUMBER | SOURCE |
|--------|----------|---------|------------------|--------|
| F1     | KNTRL SV | GCA     | -                | CoDA   |
| F2     | QSAHLKR  | GGA     | -                | CoDA   |
| F3     | QMSHLKR  | GGA     | -                | CoDA   |

ZF DNA Sequence

Bos taurus (cow) Build 3.1

Blast GGAGGAGCA

+ ZFA-unknown-73  
 1235 gGCTGGAGGAg 1225  
 1235 cCGACCTCCTc 1225

| FINGER | HELIX   | TRIPLET | REFERENCE NUMBER | SOURCE |
|--------|---------|---------|------------------|--------|
| F1     | RTDRLIR | GGA     | -                | CoDA   |
| F2     | QSAHLKR | GGA     | -                | CoDA   |
| F3     | LKHDLRR | GCT     | -                | CoDA   |

ZF DNA Sequence

Bos taurus (cow) Build 3.1

Blast GCTGGAGGA

+ ZFA-unknown-74  
 1238 tGGGCTGGAG 1228  
 1238 aCCCCGACCTc 1228

| FINGER | HELIX   | TRIPLET | REFERENCE NUMBER | SOURCE |
|--------|---------|---------|------------------|--------|
| F1     | RPAKLVL | GGA     | -                | CoDA   |
| F2     | QRSDLTR | GCT     | -                | CoDA   |
| F3     | RTEHLAR | GGG     | -                | CoDA   |

ZF DNA Sequence

Bos taurus (cow) Build 3.1

Blast GGGGCTGGA

+ ZFA-unknown-75  
 1241 aGCTGGGGCTg 1231  
 1241 tCGACCCCGAc 1231

| FINGER | HELIX   | TRIPLET | REFERENCE NUMBER | SOURCE |
|--------|---------|---------|------------------|--------|
| F1     | THSMLAR | GCT     | -                | CoDA   |
| F2     | RREHLVR | GGG     | -                | CoDA   |
| F3     | VSNLAR  | GCT     | -                | CoDA   |

ZF DNA Sequence

Bos taurus (cow) Build 3.1

Blast GCTGGGGCT

+ ZFA-unknown-76  
 1244 gGCA GCTGGGg 1234  
 1244 cCGTCGACCCc 1234

| FINGER | HELIX   | TRIPLET | REFERENCE NUMBER | SOURCE |
|--------|---------|---------|------------------|--------|
| F1     | KKDHLHR | GGG     | -                | CoDA   |
| F2     | QRSDLTR | GCT     | -                | CoDA   |
| F3     | QGGTLRR | GCA     | -                | CoDA   |

ZF DNA Sequence

Bos taurus (cow) Build 3.1

Blast GCA GCTGGG

+ ZFA-unknown-77  
 1256 tGGGGAAGCCa 1246

1256 aCCCCTTCGGt 1246

| FINGER | HELIX   | TRIPLET | REFERENCE NUMBER | SOURCE |
|--------|---------|---------|------------------|--------|
| F1     | DSPTLRR | GCC     | -                | CoDA   |
| F2     | QQTNLTR | GAA     | -                | CoDA   |
| F3     | RIDKLG  | GGG     | -                | CoDA   |

[ZF DNA Sequence](#)

Bos taurus (cow) Build 3.1

Blast GGGGAAGCC

+ ZFA-unknown-78  
1273 cGGAGCAGGAa 1263  
1273 gCCTCGTCCTt 1263

| FINGER | HELIX   | TRIPLET | REFERENCE NUMBER | SOURCE |
|--------|---------|---------|------------------|--------|
| F1     | RTDRLIR | GGA     | -                | CoDA   |
| F2     | QSTTLKR | GCA     | -                | CoDA   |
| F3     | QKPHLSR | GGA     | -                | CoDA   |

[ZF DNA Sequence](#)

Bos taurus (cow) Build 3.1

Blast GGAGCAGGA

+ ZFA-unknown-79  
1276 aGCCGGAGCAg 1266  
1276 tCGCCTCGTc 1266

| FINGER | HELIX   | TRIPLET | REFERENCE NUMBER | SOURCE |
|--------|---------|---------|------------------|--------|
| F1     | KNTRLRV | GCA     | -                | CoDA   |
| F2     | QSAHLKR | GGA     | -                | CoDA   |
| F3     | DPSNLR  | GCC     | -                | CoDA   |

[ZF DNA Sequence](#)

Bos taurus (cow) Build 3.1

Blast GCCGGAGCA

+

ZFA-unknown-80  
1322 aGATGCAGTGc 1312  
1322 tCTACGTCACg 1312

| FINGER | HELIX   | TRIPLET | REFERENCE NUMBER | SOURCE |
|--------|---------|---------|------------------|--------|
| F1     | RSHILTN | GTG     | -                | CoDA   |
| F2     | QSTTLKR | GCA     | -                | CoDA   |
| F3     | LNSNLAR | GAT     | -                | CoDA   |

ZF DNA Sequence

Bos taurus (cow) Build 3.1

Blast GATGCAGTG

+ ZFA-unknown-81  
1332 tGCAGGAGTCa 1322  
1332 aCGTCCTCAGt 1322

| FINGER | HELIX   | TRIPLET | REFERENCE NUMBER | SOURCE |
|--------|---------|---------|------------------|--------|
| F1     | TSTLLKR | GTC     | -                | CoDA   |
| F2     | QSAHLKR | GGA     | -                | CoDA   |
| F3     | QDVSLVR | GCA     | -                | CoDA   |

ZF DNA Sequence

Bos taurus (cow) Build 3.1

Blast GCAGGAGTC

+ ZFA-unknown-82  
1350 gTGGGAGAACa 1340  
1350 cACCCTCTTgt 1340

| FINGER | HELIX   | TRIPLET | REFERENCE NUMBER | SOURCE |
|--------|---------|---------|------------------|--------|
| F1     | GHTALRN | AAC     | -                | CoDA   |
| F2     | RQDNLGR | GAG     | -                | CoDA   |
| F3     | RMDHLAG | TGG     | -                | CoDA   |

ZF DNA Sequence

Bos taurus (cow) Build 3.1

Blast TGGGAGAAC

+ ZFA-unknown-83  
1351 gGTGGGAGAAc 1341  
1351 cCACCTCTTg 1341

| FINGER | HELIX   | TRIPLET | REFERENCE NUMBER | SOURCE |
|--------|---------|---------|------------------|--------|
| F1     | QRSNLAR | GAA     | -                | CoDA   |
| F2     | QSAHLKR | GGA     | -                | CoDA   |
| F3     | RNTALQH | GTG     | -                | CoDA   |

#### ZF DNA Sequence

Bos taurus (cow) Build 3.1

Blast GTGGGAGAA

+ ZFA-unknown-84  
1355 gTCGGGTGGGa 1345  
1355 cAGCCCACCCt 1345

| FINGER | HELIX   | TRIPLET | REFERENCE NUMBER | SOURCE |
|--------|---------|---------|------------------|--------|
| F1     | KGDHLRR | GGG     | -                | CoDA   |
| F2     | EAHHLSR | GGT     | -                | CoDA   |
| F3     | RADGLQL | TCG     | -                | CoDA   |

#### ZF DNA Sequence

Bos taurus (cow) Build 3.1

Blast TCGGGTGGG

+ ZFA-unknown-85  
1363 aGAGGAAGGTc 1353  
1363 tCTCCTTCCAg 1353

| FINGER | HELIX   | TRIPLET | REFERENCE NUMBER | SOURCE |
|--------|---------|---------|------------------|--------|
| F1     | TKQRLEV | GGT     | -                | CoDA   |
| F2     | QQTNLTR | GAA     | -                | CoDA   |
| F3     | RRDNLNR | GAG     | -                | CoDA   |

#### ZF DNA Sequence

Bos taurus (cow) Build 3.1

Blast GAGGAAGGT

⊕ ZFA-unknown-86  
1375 aGGGGAGGACa 1365  
1375 tCCCCTCCTGt 1365

| FINGER | HELIX   | TRIPLET | REFERENCE NUMBER | SOURCE |
|--------|---------|---------|------------------|--------|
| F1     | DEANLRR | GAC     | -                | CoDA   |
| F2     | RQDNLGR | GAG     | -                | CoDA   |
| F3     | RIDKLLG | GGG     | -                | CoDA   |

ZF DNA Sequence

Bos taurus (cow) Build 3.1

Blast GGGGAGGAC

⊕ ZFA-unknown-87  
1378 gGAGGGGAGg 1368  
1378 cCCTCCCCTC 1368

| FINGER | HELIX   | TRIPLET | REFERENCE NUMBER | SOURCE |
|--------|---------|---------|------------------|--------|
| F1     | RNTNLTR | GAG     | -                | CoDA   |
| F2     | RREHLVR | GGG     | -                | CoDA   |
| F3     | QTTHLRR | GGA     | -                | CoDA   |

ZF DNA Sequence

Bos taurus (cow) Build 3.1

Blast GGAGGGGAG

⊕ ZFA-unknown-88  
1380 gTGGAGGGG 1370  
1380 cACCCTCCCCT 1370

| FINGER | HELIX   | TRIPLET | REFERENCE NUMBER | SOURCE |
|--------|---------|---------|------------------|--------|
| F1     | RNTHLAR | GGG     | -                | CoDA   |
| F2     | RQDNLGR | GAG     | -                | CoDA   |
| F3     | RMDHLAG | TGG     | -                | CoDA   |

ZF DNA Sequence



Bos taurus (cow) Build 3.1

Blast TGGGAGGGG

⊕ ZFA-unknown-89  
 1381 gGTGGGAGGGg 1371  
 1381 cCACCCCTCCCc 1371

| FINGER | HELIX   | TRIPLET | REFERENCE NUMBER | SOURCE |
|--------|---------|---------|------------------|--------|
| F1     | KKDHLHR | GGG     | -                | CoDA   |
| F2     | QSAHLKR | GGA     | -                | CoDA   |
| F3     | RNTALQH | GTG     | -                | CoDA   |

[ZF DNA Sequence](#)

Bos taurus (cow) Build 3.1

Blast GTGGGAGGG

⊕ ZFA-unknown-90  
 1385 gGCAGGTGGGa 1375  
 1385 cCGTCCACCCTc 1375

| FINGER | HELIX   | TRIPLET | REFERENCE NUMBER | SOURCE |
|--------|---------|---------|------------------|--------|
| F1     | KGDHLRR | GGG     | -                | CoDA   |
| F2     | EAHHLSR | GGT     | -                | CoDA   |
| F3     | QNGTLTR | GCA     | -                | CoDA   |

[ZF DNA Sequence](#)

Bos taurus (cow) Build 3.1

Blast GCAGGTGGG

⊕ ZFA-unknown-91  
 1388 aGGGCGAGGTg 1378  
 1388 tCCCCGTCCAc 1378

| FINGER | HELIX   | TRIPLET | REFERENCE NUMBER | SOURCE |
|--------|---------|---------|------------------|--------|
| F1     | TTTKLAI | GGT     | -                | CoDA   |
| F2     | QSTTLKR | GCA     | -                | CoDA   |
| F3     | RTEHLAR | GGG     | -                | CoDA   |

[ZF DNA Sequence](#)

Bos taurus (cow) Build 3.1

Blast GGGGCAGGT

⊕ ZFA-unknown-92  
1409 gGAGAGTCTc 1399  
1409 cTTCTCAGAg 1399

| FINGER | HELIX   | TRIPLET | REFERENCE NUMBER | SOURCE |
|--------|---------|---------|------------------|--------|
| F1     | SKPNLKM | TCT     | -                | CoDA   |
| F2     | RQDNLGR | GAG     | -                | CoDA   |
| F3     | QRNNLGR | GAA     | -                | CoDA   |

[ZF DNA Sequence](#)

Bos taurus (cow) Build 3.1

Blast GAAGAGTCT

⊕ ZFA-unknown-93  
1433 aGAGGAGGCCa 1423  
1433 tCTCCTCCGgt 1423

| FINGER | HELIX   | TRIPLET | REFERENCE NUMBER | SOURCE |
|--------|---------|---------|------------------|--------|
| F1     | VRKDLTR | GCC     | -                | CoDA   |
| F2     | RQDNLGR | GAG     | -                | CoDA   |
| F3     | RVDNLPR | GAG     | -                | CoDA   |

[ZF DNA Sequence](#)

Bos taurus (cow) Build 3.1

Blast GAGGAGGCC

⊕ ZFA-unknown-94  
1432 cTGGGTATGTc 1442  
1432 gACCCATACAg 1442

| FINGER | HELIX   | TRIPLET | REFERENCE NUMBER | SOURCE |
|--------|---------|---------|------------------|--------|
| F1     | RKQHLQL | TGT     | -                | CoDA   |
| F2     | QRSSLVR | GTA     | -                | CoDA   |
| F3     | RSDHLSL | TGG     | -                | CoDA   |

### ZF DNA Sequence

Bos taurus (cow) Build 3.1

Blast TGGGTATGT

- + ZFA-unknown-95  
1447 aGGCGGAGCTc 1457  
1447 tCCGCCTCGAg 1457

| FINGER | HELIX   | TRIPLET | REFERENCE NUMBER | SOURCE |
|--------|---------|---------|------------------|--------|
| F1     | TTQALRR | GCT     | -                | CoDA   |
| F2     | QSAHLKR | GGA     | -                | CoDA   |
| F3     | EKSHLKR | GGC     | -                | CoDA   |

### ZF DNA Sequence

Bos taurus (cow) Build 3.1

Blast GGCGGAGCT

- + ZFA-unknown-96  
1464 aGGGGGAGAGc 1454  
1464 tCCCCCTCTCg 1454

| FINGER | HELIX   | TRIPLET | REFERENCE NUMBER | SOURCE |
|--------|---------|---------|------------------|--------|
| F1     | KHSNLTR | GAG     | -                | CoDA   |
| F2     | QSAHLKR | GGA     | -                | CoDA   |
| F3     | RTEHLAR | GGG     | -                | CoDA   |

### ZF DNA Sequence

Bos taurus (cow) Build 3.1

Blast GGGGGAGAG

- + ZFA-unknown-97  
1466 tGAGGGGAGa 1456  
1466 aTCCCCCTCt 1456

| FINGER | HELIX   | TRIPLET | REFERENCE NUMBER | SOURCE |
|--------|---------|---------|------------------|--------|
| F1     | RNTNLTR | GAG     | -                | CoDA   |
| F2     | RREHLVR | GGG     | -                | CoDA   |

|    |         |     |   |      |
|----|---------|-----|---|------|
| F3 | RRDNLLR | GAG | - | CoDA |
|----|---------|-----|---|------|

ZF DNA Sequence

Bos taurus (cow) Build 3.1

Blast GAGGGGGAG

+ ZFA-unknown-98  
 1469 aGTTGAGGGGg 1459  
 1469 tCAACTCCCCc 1459

| FINGER | HELIX   | TRIPLET | REFERENCE NUMBER | SOURCE |
|--------|---------|---------|------------------|--------|
| F1     | RNTHLAR | GGG     | -                | CoDA   |
| F2     | RQDNLGR | GAG     | -                | CoDA   |
| F3     | HHNSLTR | GTT     | -                | CoDA   |

ZF DNA Sequence

Bos taurus (cow) Build 3.1

Blast GTTGAGGGG

+ ZFA-unknown-99  
 1493 cGAAGATGTA 1503  
 1493 gCTTCTACATA 1503

| FINGER | HELIX   | TRIPLET | REFERENCE NUMBER | SOURCE |
|--------|---------|---------|------------------|--------|
| F1     | QQQALVR | GTA     | -                | CoDA   |
| F2     | VRHNLTR | GAT     | -                | CoDA   |
| F3     | QRNNLGR | GAA     | -                | CoDA   |

ZF DNA Sequence

Bos taurus (cow) Build 3.1

Blast GAAGATGTA

+ ZFA-unknown-100  
 1517 aTAGGAAGAA 1507  
 1517 tATCCTTCTTa 1507

| FINGER | HELIX   | TRIPLET | REFERENCE NUMBER | SOURCE |
|--------|---------|---------|------------------|--------|
| F1     | QASNLTR | GAA     | -                | CoDA   |

|    |         |     |   |      |
|----|---------|-----|---|------|
| F2 | QQTNLTR | GAA | - | CoDA |
| F3 | RRDHLSL | TAG | - | CoDA |

ZF DNA Sequence

Bos taurus (cow) Build 3.1

Blast TAGGAAGAA

⊕ ZFA-unknown-101  
 1539 cTGGGAAGGAa 1529  
 1539 gACCCTTCCTt 1529

| FINGER | HELIX   | TRIPLET | REFERENCE NUMBER | SOURCE |
|--------|---------|---------|------------------|--------|
| F1     | RMERLDR | GGA     | -                | CoDA   |
| F2     | QQTNLTR | GAA     | -                | CoDA   |
| F3     | RSDHLSL | TGG     | -                | CoDA   |

ZF DNA Sequence

Bos taurus (cow) Build 3.1

Blast TGGGAAGGA

⊕ ZFA-unknown-102  
 1538 aGATGGAGACTt 1548  
 1538 tCTACCTCTGa 1548

| FINGER | HELIX   | TRIPLET | REFERENCE NUMBER | SOURCE |
|--------|---------|---------|------------------|--------|
| F1     | DEANLRR | GAC     | -                | CoDA   |
| F2     | QSAHLKR | GGA     | -                | CoDA   |
| F3     | ISHNLAR | GAT     | -                | CoDA   |

ZF DNA Sequence

Bos taurus (cow) Build 3.1

Blast GATGGAGAC

⊕ ZFA-unknown-103  
 1562 gGAAGCAGCTg 1572  
 1562 cCTTCGTCGAc 1572

| FINGER | HELIX | TRIPLET | REFERENCE NUMBER | SOURCE |
|--------|-------|---------|------------------|--------|
|--------|-------|---------|------------------|--------|

|    |         |     |   |      |
|----|---------|-----|---|------|
| F1 | TKQILGR | GCT | - | CoDA |
| F2 | QSTTLKR | GCA | - | CoDA |
| F3 | QRNNLGR | GAA | - | CoDA |

ZF DNA Sequence

Bos taurus (cow) Build 3.1

Blast GAAGCAGCT

+ ZFA-unknown-104  
 1574 gGCAGCTGCTt 1564  
 1574 cCGTCGACGAa 1564

| FINGER | HELIX   | TRIPLET | REFERENCE NUMBER | SOURCE |
|--------|---------|---------|------------------|--------|
| F1     | MKNTLTR | GCT     | -                | CoDA   |
| F2     | QRSDLTR | GCT     | -                | CoDA   |
| F3     | QGGTLRR | GCA     | -                | CoDA   |

ZF DNA Sequence

Bos taurus (cow) Build 3.1

Blast GCAGCTGCT

+ ZFA-unknown-105  
 1565 aGCAGCTGCCc 1575  
 1565 tCGTCGACGGg 1575

| FINGER | HELIX   | TRIPLET | REFERENCE NUMBER | SOURCE |
|--------|---------|---------|------------------|--------|
| F1     | DRRTLDR | GCC     | -                | CoDA   |
| F2     | QRSDLTR | GCT     | -                | CoDA   |
| F3     | QGGTLRR | GCA     | -                | CoDA   |

ZF DNA Sequence

Bos taurus (cow) Build 3.1

Blast GCAGCTGCC

+ ZFA-unknown-106  
 1577 gGGGCGAGCTg 1567  
 1577 cCCCCGTCGAc 1567

| FINGER | HELIX   | TRIPLET | REFERENCE NUMBER | SOURCE |
|--------|---------|---------|------------------|--------|
| F1     | TKQILGR | GCT     | -                | CoDA   |
| F2     | QSTTLKR | GCA     | -                | CoDA   |
| F3     | RTEHLAR | GGG     | -                | CoDA   |

ZF DNA Sequence

Bos taurus (cow) Build 3.1

Blast GGGGCAGCT

+ ZFA-unknown-107  
 1581 gGCA<sup>A</sup>GGG<sup>G</sup>GGC<sup>A</sup> 1571  
 1581 cCGTCCCCCGt 1571

| FINGER | HELIX   | TRIPLET | REFERENCE NUMBER | SOURCE |
|--------|---------|---------|------------------|--------|
| F1     | TNSKLTR | GGC     | -                | CoDA   |
| F2     | RREHLVR | GGG     | -                | CoDA   |
| F3     | QTATLKR | GCA     | -                | CoDA   |

ZF DNA Sequence

Bos taurus (cow) Build 3.1

Blast GCAGGGGGC

+ ZFA-unknown-108  
 1584 aGT<sup>G</sup>GCAG<sup>G</sup>GGG<sup>G</sup> 1574  
 1584 tCACCGTCCCCc 1574

| FINGER | HELIX   | TRIPLET | REFERENCE NUMBER | SOURCE |
|--------|---------|---------|------------------|--------|
| F1     | RRAHLQN | GGG     | -                | CoDA   |
| F2     | QSTTLKR | GCA     | -                | CoDA   |
| F3     | RKDALHV | GTG     | -                | CoDA   |

ZF DNA Sequence

Bos taurus (cow) Build 3.1

Blast GTGGCAGGG

+ ZFA-unknown-109  
 1623 tGAAG<sup>A</sup>GAAG<sup>G</sup>GGC<sup>C</sup> 1613

1623 aCTTCTTCCCg 1613

| FINGER | HELIX   | TRIPLET | REFERENCE NUMBER | SOURCE |
|--------|---------|---------|------------------|--------|
| F1     | KRERLDR | GGG     | -                | CoDA   |
| F2     | QQTNLTR | GAA     | -                | CoDA   |
| F3     | QTNNLNR | GAA     | -                | CoDA   |

[ZF DNA Sequence](#)

Bos taurus (cow) Build 3.1

Blast GAAGAAGGG

+ ZFA-unknown-110  
1626 gGATGAAGAAg 1616  
1626 cTACTTCTTc 1616

| FINGER | HELIX   | TRIPLET | REFERENCE NUMBER | SOURCE |
|--------|---------|---------|------------------|--------|
| F1     | QASNLTR | GAA     | -                | CoDA   |
| F2     | QQTNLTR | GAA     | -                | CoDA   |
| F3     | VGSNLTR | GAT     | -                | CoDA   |

[ZF DNA Sequence](#)

Bos taurus (cow) Build 3.1

Blast GATGAAGAA

+ ZFA-unknown-111  
1629 tGAGGATGAAG 1619  
1629 aCTCCTACTTc 1619

| FINGER | HELIX   | TRIPLET | REFERENCE NUMBER | SOURCE |
|--------|---------|---------|------------------|--------|
| F1     | RKPNLLR | GAA     | -                | CoDA   |
| F2     | VRHNLTR | GAT     | -                | CoDA   |
| F3     | REDNLPR | GAG     | -                | CoDA   |

[ZF DNA Sequence](#)

Bos taurus (cow) Build 3.1

Blast GAGGATGAAG

+



ZFA-unknown-112  
1671 tGAAGAGGACa 1661  
1671 aCTTCTCCTGt 1661

| FINGER | HELIX   | TRIPLET | REFERENCE NUMBER | SOURCE |
|--------|---------|---------|------------------|--------|
| F1     | DEANLRR | GAC     | -                | CoDA   |
| F2     | RQDNLGR | GAG     | -                | CoDA   |
| F3     | QRNNLGR | GAA     | -                | CoDA   |

#### ZF DNA Sequence

Bos taurus (cow) Build 3.1

Blast GAAGAGGAC

+ ZFA-unknown-113  
1695 aCGCGAAGAGa 1685  
1695 tGCCTTCTct 1685

| FINGER | HELIX   | TRIPLET | REFERENCE NUMBER | SOURCE |
|--------|---------|---------|------------------|--------|
| F1     | KHSNLTR | GAG     | -                | CoDA   |
| F2     | QQTNLTR | GAA     | -                | CoDA   |
| F3     | RLDMLAR | GCG     | -                | CoDA   |

#### ZF DNA Sequence

Bos taurus (cow) Build 3.1

Blast GCGGAAGAG

+ ZFA-unknown-114  
1733 gGCTGTGGCa 1743  
1733 cCGACACCCGt 1743

| FINGER | HELIX   | TRIPLET | REFERENCE NUMBER | SOURCE |
|--------|---------|---------|------------------|--------|
| F1     | SPSKLVR | GGC     | -                | CoDA   |
| F2     | RREVLEN | GTG     | -                | CoDA   |
| F3     | VGASLKR | GCT     | -                | CoDA   |

#### ZF DNA Sequence

Bos taurus (cow) Build 3.1

Blast GCTGTGGC

⊕ ZFA-unknown-115  
1737 gTGGGCAGTg 1747  
1737 cACCCGTCACg 1747

| FINGER | HELIX   | TRIPLET | REFERENCE NUMBER | SOURCE |
|--------|---------|---------|------------------|--------|
| F1     | RSHILTN | GTG     | -                | CoDA   |
| F2     | QSTTLKR | GCA     | -                | CoDA   |
| F3     | RSDHLSL | TGG     | -                | CoDA   |

ZF DNA Sequence

Bos taurus (cow) Build 3.1

Blast TGGGCAGTg

⊕ ZFA-unknown-116  
1755 tGAAGAGGGCa 1745  
1755 aCTTCTCCCGt 1745

| FINGER | HELIX   | TRIPLET | REFERENCE NUMBER | SOURCE |
|--------|---------|---------|------------------|--------|
| F1     | SPSKLVR | GGC     | -                | CoDA   |
| F2     | RQDNLGR | GAG     | -                | CoDA   |
| F3     | QRNNLGR | GAA     | -                | CoDA   |

ZF DNA Sequence

Bos taurus (cow) Build 3.1

Blast GAAGAGGGC

⊕ ZFA-unknown-117  
1758 tGCTGAAGAGg 1748  
1758 aCGACTTCTCc 1748

| FINGER | HELIX   | TRIPLET | REFERENCE NUMBER | SOURCE |
|--------|---------|---------|------------------|--------|
| F1     | KHSNLTR | GAG     | -                | CoDA   |
| F2     | QQTNLTR | GAA     | -                | CoDA   |
| F3     | VGNSLTR | GCT     | -                | CoDA   |

ZF DNA Sequence

Bos taurus (cow) Build 3.1

Blast GCTGAAGAG

⊕ ZFA-unknown-118  
1759 tTGTGGTGCCc 1769  
1759 aACACCACGGg 1769

| FINGER | HELIX   | TRIPLET | REFERENCE NUMBER | SOURCE |
|--------|---------|---------|------------------|--------|
| F1     | SKKSLTR | GCC     | -                | CoDA   |
| F2     | EAHHLR  | GGT     | -                | CoDA   |
| F3     | QPHGLAH | TGT     | -                | CoDA   |

ZF DNA Sequence

Bos taurus (cow) Build 3.1

Blast TGTGGTGCC

⊕ ZFA-unknown-119  
1785 cTAGGTAGCAc 1795  
1785 gATCCATCGTg 1795

| FINGER | HELIX   | TRIPLET | REFERENCE NUMBER | SOURCE |
|--------|---------|---------|------------------|--------|
| F1     | HNGTLKR | GCA     | -                | CoDA   |
| F2     | QRSSLVR | GTA     | -                | CoDA   |
| F3     | RLDGLAG | TAG     | -                | CoDA   |

ZF DNA Sequence

Bos taurus (cow) Build 3.1

Blast TAGGTAGCA

⊕ ZFA-unknown-120  
1801 cTGCAGTGCt 1791  
1801 gACGCTCACGa 1791

| FINGER | HELIX    | TRIPLET | REFERENCE NUMBER | SOURCE |
|--------|----------|---------|------------------|--------|
| F1     | RRRNLHL  | TGC     | -                | CoDA   |
| F2     | RQDNLGR  | GAG     | -                | CoDA   |
| F3     | ANRTLHVH | TGC     | -                | CoDA   |

ZF DNA Sequence

Bos taurus (cow) Build 3.1

Blast TGCGAGTGC

⊕ ZFA-unknown-121  
 1809 cTGTGTAGCCt 1819  
 1809 gACACATCGGa 1819

| FINGER | HELIX   | TRIPLET | REFERENCE NUMBER | SOURCE |
|--------|---------|---------|------------------|--------|
| F1     | DGSTLR  | GCC     | -                | CoDA   |
| F2     | QRSSLVR | GTA     | -                | CoDA   |
| F3     | QPHGLAH | TGT     | -                | CoDA   |

[ZF DNA Sequence](#)

Bos taurus (cow) Build 3.1

Blast TGTGTAGCC

⊕ ZFA-unknown-122  
 1861 tGCTGCTAGGg 1871  
 1861 aCGACGATCCc 1871

| FINGER | HELIX   | TRIPLET | REFERENCE NUMBER | SOURCE |
|--------|---------|---------|------------------|--------|
| F1     | RSSHLKM | AGG     | -                | CoDA   |
| F2     | QRSDLTR | GCT     | -                | CoDA   |
| F3     | LRASLR  | GCT     | -                | CoDA   |

[ZF DNA Sequence](#)

Bos taurus (cow) Build 3.1

Blast GCTGCTAGG

⊕ ZFA-unknown-123  
 1866 cTAGGGTGCCa 1876  
 1866 gATCCACGGt 1876

| FINGER | HELIX   | TRIPLET | REFERENCE NUMBER | SOURCE |
|--------|---------|---------|------------------|--------|
| F1     | SKKSLTR | GCC     | -                | CoDA   |
| F2     | EAHHLR  | GGT     | -                | CoDA   |
| F3     | RRDNLPR | TAG     | -                | CoDA   |

[ZF DNA Sequence](#)

Bos taurus (cow) Build 3.1

Blast TAGGGTGCC

⊕ ZFA-unknown-124  
1898 gGGTGCAGGCc 1908  
1898 cCCACGTCCGg 1908

| FINGER | HELIX   | TRIPLET | REFERENCE NUMBER | SOURCE |
|--------|---------|---------|------------------|--------|
| F1     | VPSKLLR | GGC     | -                | CoDA   |
| F2     | QSTTLKR | GCA     | -                | CoDA   |
| F3     | VDHHLRR | GGT     | -                | CoDA   |

[ZF DNA Sequence](#)

Bos taurus (cow) Build 3.1

Blast GGTGCAGGC

⊕ ZFA-unknown-125  
1926 gGGTGAGGCCt 1916  
1926 cCCACTCCGga 1916

| FINGER | HELIX   | TRIPLET | REFERENCE NUMBER | SOURCE |
|--------|---------|---------|------------------|--------|
| F1     | VRKDLTR | GCC     | -                | CoDA   |
| F2     | RQDNLGR | GAG     | -                | CoDA   |
| F3     | VKHGLGR | GGT     | -                | CoDA   |

[ZF DNA Sequence](#)

Bos taurus (cow) Build 3.1

Blast GGTGAGGCC

⊕ ZFA-unknown-126  
1946 tTGGGGAGTGg 1956  
1946 aACCCCTCACc 1956

| FINGER | HELIX   | TRIPLET | REFERENCE NUMBER | SOURCE |
|--------|---------|---------|------------------|--------|
| F1     | RNFILQR | GTG     | -                | CoDA   |
| F2     | QSAHLKR | GGA     | -                | CoDA   |
| F3     | RSDHLSL | TGG     | -                | CoDA   |

### ZF DNA Sequence

Bos taurus (cow) Build 3.1

Blast TGGGGAGTG

- + ZFA-unknown-127  
1949 gGGAGTGGCTg 1959  
1949 cCCTCACCGAc 1959

| FINGER | HELIX   | TRIPLET | REFERENCE NUMBER | SOURCE |
|--------|---------|---------|------------------|--------|
| F1     | TKPILVR | GCT     | -                | CoDA   |
| F2     | RREVLEN | GTG     | -                | CoDA   |
| F3     | QKPHLSR | GGA     | -                | CoDA   |

### ZF DNA Sequence

Bos taurus (cow) Build 3.1

Blast GGAGTGGCT

- + ZFA-unknown-128  
1952 aGTGGCTGCCc 1962  
1952 tCACCGACGGg 1962

| FINGER | HELIX   | TRIPLET | REFERENCE NUMBER | SOURCE |
|--------|---------|---------|------------------|--------|
| F1     | DRRTLDR | GCC     | -                | CoDA   |
| F2     | QRSDLTR | GCT     | -                | CoDA   |
| F3     | RPDALPR | GTG     | -                | CoDA   |

### ZF DNA Sequence

Bos taurus (cow) Build 3.1

Blast GTGGCTGCC

- + ZFA-unknown-129  
1983 gGGTGACAGGc 1973  
1983 cCCTACTGTCCg 1973

| FINGER | HELIX   | TRIPLET | REFERENCE NUMBER | SOURCE |
|--------|---------|---------|------------------|--------|
| F1     | RRAHLLN | AGG     | -                | CoDA   |
| F2     | DRGNLTR | GAC     | -                | CoDA   |

|    |         |     |   |      |
|----|---------|-----|---|------|
| F3 | IRHHLKR | GGT | - | CoDA |
|----|---------|-----|---|------|

ZF DNA Sequence

Bos taurus (cow) Build 3.1

Blast GGTGACAGG

- + ZFA-unknown-130  
2016 gGGTGCAGAGt 2006  
2016 cCCACGTCTCa 2006

| FINGER | HELIX   | TRIPLET | REFERENCE NUMBER | SOURCE |
|--------|---------|---------|------------------|--------|
| F1     | KHSNLAR | GAG     | -                | CoDA   |
| F2     | QSTTLKR | GCA     | -                | CoDA   |
| F3     | VDHHLRR | GGT     | -                | CoDA   |

ZF DNA Sequence

Bos taurus (cow) Build 3.1

Blast GGTGCAGAG

- + ZFA-unknown-131  
2032 aGCTGAAGGct 2042  
2032 tCGACTTCCGa 2042

| FINGER | HELIX   | TRIPLET | REFERENCE NUMBER | SOURCE |
|--------|---------|---------|------------------|--------|
| F1     | TRAKLHI | GGC     | -                | CoDA   |
| F2     | QQTNLTR | GAA     | -                | CoDA   |
| F3     | VGNSLTR | GCT     | -                | CoDA   |

ZF DNA Sequence

Bos taurus (cow) Build 3.1

Blast GCTGAAGGC

- + ZFA-unknown-132  
2054 tGTGGCCTGCa 2044  
2054 aCACCGGACGt 2044

| FINGER | HELIX   | TRIPLET | REFERENCE NUMBER | SOURCE |
|--------|---------|---------|------------------|--------|
| F1     | RGRNLEM | TGC     | -                | CoDA   |

|    |         |     |   |      |
|----|---------|-----|---|------|
| F2 | DSSVLR  | GCC | - | CoDA |
| F3 | RHTSLTR | GTG | - | CoDA |

ZF DNA Sequence

Bos taurus (cow) Build 3.1

Blast GTGGCCTGC

⊕ ZFA-unknown-133  
 2057 gTGTGTGGCCt 2047  
 2057 cACACACCGGa 2047

| FINGER | HELIX   | TRIPLET | REFERENCE NUMBER | SOURCE |
|--------|---------|---------|------------------|--------|
| F1     | KRRDLDR | GCC     | -                | CoDA   |
| F2     | RREVLEN | GTG     | -                | CoDA   |
| F3     | QRHGLSS | TGT     | -                | CoDA   |

ZF DNA Sequence

Bos taurus (cow) Build 3.1

Blast TGTGTGGCC

⊕ ZFA-unknown-134  
 2060 tGTAGCCTGTc 2070  
 2060 aCATCGGACA g 2070

| FINGER | HELIX   | TRIPLET | REFERENCE NUMBER | SOURCE |
|--------|---------|---------|------------------|--------|
| F1     | RKQHLTL | TGT     | -                | CoDA   |
| F2     | DSSVLR  | GCC     | -                | CoDA   |
| F3     | QSTSLQR | GTA     | -                | CoDA   |

ZF DNA Sequence

Bos taurus (cow) Build 3.1

Blast GTAGCCTGT

⊕ ZFA-unknown-135  
 2094 tTGGTTTGTt 2104  
 2094 aACCAAACAa 2104

| FINGER | HELIX | TRIPLET | REFERENCE NUMBER | SOURCE |
|--------|-------|---------|------------------|--------|
|--------|-------|---------|------------------|--------|



|    |         |     |   |      |
|----|---------|-----|---|------|
| F1 | RRQHLQY | TGT | - | CoDA |
| F2 | HKSSLTR | GTT | - | CoDA |
| F3 | RSDHLSL | TGG | - | CoDA |

ZF DNA Sequence

Bos taurus (cow) Build 3.1

Blast TGGGTTTGT

+ ZFA-unknown-136  
 2113 aGGGCTGAAg 2123  
 2113 tCCCCGACTTc 2123

| FINGER | HELIX   | TRIPLET | REFERENCE NUMBER | SOURCE |
|--------|---------|---------|------------------|--------|
| F1     | TTTNLRR | GAA     | -                | CoDA   |
| F2     | QRSDLTR | GCT     | -                | CoDA   |
| F3     | RTEHLAR | GGG     | -                | CoDA   |

ZF DNA Sequence

Bos taurus (cow) Build 3.1

Blast GGGGCTGAA

+ ZFA-unknown-137  
 2116 gGCTGAAGAAg 2126  
 2116 cCGACTTCTTc 2126

| FINGER | HELIX   | TRIPLET | REFERENCE NUMBER | SOURCE |
|--------|---------|---------|------------------|--------|
| F1     | QASNLTR | GAA     | -                | CoDA   |
| F2     | QQTNLTR | GAA     | -                | CoDA   |
| F3     | VGNSLTR | GCT     | -                | CoDA   |

ZF DNA Sequence

Bos taurus (cow) Build 3.1

Blast GCTGAAGAA

+ ZFA-unknown-138  
 2119 tGAAGAGGCa 2129  
 2119 aCTTCTCCGt 2129

| FINGER | HELIX   | TRIPLET | REFERENCE NUMBER | SOURCE |
|--------|---------|---------|------------------|--------|
| F1     | TRAKLHI | GGC     | -                | CoDA   |
| F2     | QQTNLTR | GAA     | -                | CoDA   |
| F3     | QTNNLNR | GAA     | -                | CoDA   |

ZF DNA Sequence

Bos taurus (cow) Build 3.1

Blast GAAGAAGGC

- + ZFA-unknown-139  
 2194 aTGGGGTGGTt 2204  
 2194 tACCCACCAa 2204

| FINGER | HELIX   | TRIPLET | REFERENCE NUMBER | SOURCE |
|--------|---------|---------|------------------|--------|
| F1     | MKHHLAR | GGT     | -                | CoDA   |
| F2     | EAHHLSR | GGT     | -                | CoDA   |
| F3     | RSDHLSL | TGG     | -                | CoDA   |

ZF DNA Sequence

Bos taurus (cow) Build 3.1

Blast TGGGGTGGT

- + ZFA-unknown-140  
 2195 tGGGGTGGTc 2205  
 2195 aCCCCACCAg 2205

| FINGER | HELIX   | TRIPLET | REFERENCE NUMBER | SOURCE |
|--------|---------|---------|------------------|--------|
| F1     | MNSVLKR | GTT     | -                | CoDA   |
| F2     | RREVLEN | GTG     | -                | CoDA   |
| F3     | RQGHLKR | GGG     | -                | CoDA   |

ZF DNA Sequence

Bos taurus (cow) Build 3.1

Blast GGGGTGGT

- + ZFA-unknown-141  
 2221 tGGTGAGGTCc 2231

2221 aCCA**CT**CCAGg 2231

| FINGER | HELIX   | TRIPLET | REFERENCE NUMBER | SOURCE |
|--------|---------|---------|------------------|--------|
| F1     | NTSLLRR | GTC     | -                | CoDA   |
| F2     | RQDNLGR | GAG     | -                | CoDA   |
| F3     | VKHGLGR | GGT     | -                | CoDA   |

[ZF DNA Sequence](#)

Bos taurus (cow) Build 3.1

Blast GGTGAGGTC

+ ZFA-unknown-142  
2233 aGCTGTTGCTg 2243  
2233 tCGACAACGAc 2243

| FINGER | HELIX   | TRIPLET | REFERENCE NUMBER | SOURCE |
|--------|---------|---------|------------------|--------|
| F1     | TKQILGR | GCT     | -                | CoDA   |
| F2     | HKSSLTR | GTT     | -                | CoDA   |
| F3     | VSNTLTR | GCT     | -                | CoDA   |

[ZF DNA Sequence](#)

Bos taurus (cow) Build 3.1

Blast GCTGTTGCT

+ ZFA-unknown-143  
2236 tGTTGCTGTTg 2246  
2236 aCAACGACAAC 2246

| FINGER | HELIX   | TRIPLET | REFERENCE NUMBER | SOURCE |
|--------|---------|---------|------------------|--------|
| F1     | QATLLRR | GTT     | -                | CoDA   |
| F2     | QRSDLTR | GCT     | -                | CoDA   |
| F3     | IRTSLKR | GTT     | -                | CoDA   |

[ZF DNA Sequence](#)

Bos taurus (cow) Build 3.1

Blast GTTGCTGTT

+

ZFA-unknown-144  
2239 tGCTGTTGTCa 2249  
2239 aCGACAACAGt 2249

| FINGER | HELIX   | TRIPLET | REFERENCE NUMBER | SOURCE |
|--------|---------|---------|------------------|--------|
| F1     | TKKILTV | GTC     | -                | CoDA   |
| F2     | HKSSLTR | GTT     | -                | CoDA   |
| F3     | VSNTLTR | GCT     | -                | CoDA   |

#### ZF DNA Sequence

Bos taurus (cow) Build 3.1

Blast GCTGTTGTC

+ ZFA-unknown-145  
2252 tGTTGACAACa 2242  
2252 aCAACTGTTGt 2242

| FINGER | HELIX   | TRIPLET | REFERENCE NUMBER | SOURCE |
|--------|---------|---------|------------------|--------|
| F1     | GHTALRN | AAC     | -                | CoDA   |
| F2     | DRGNLTR | GAC     | -                | CoDA   |
| F3     | HHNSLTR | GTT     | -                | CoDA   |

#### ZF DNA Sequence

Bos taurus (cow) Build 3.1

Blast GTTGACAAC

+ ZFA-unknown-146  
2284 aGCAGCAGGTc 2274  
2284 tCGTCGTCCAg 2274

| FINGER | HELIX   | TRIPLET | REFERENCE NUMBER | SOURCE |
|--------|---------|---------|------------------|--------|
| F1     | TTTKLAI | GGT     | -                | CoDA   |
| F2     | QSTTLKR | GCA     | -                | CoDA   |
| F3     | QPNTLTR | GCA     | -                | CoDA   |

#### ZF DNA Sequence

Bos taurus (cow) Build 3.1

Blast GCAGCAGGT

+ ZFA-unknown-147  
2278 tGCTGCTGAAc 2288  
2278 aCGACGACTTg 2288

| FINGER | HELIX   | TRIPLET | REFERENCE NUMBER | SOURCE |
|--------|---------|---------|------------------|--------|
| F1     | TTTNLRR | GAA     | -                | CoDA   |
| F2     | QRSDLTR | GCT     | -                | CoDA   |
| F3     | LRASLRR | GCT     | -                | CoDA   |

#### ZF DNA Sequence

Bos taurus (cow) Build 3.1

Blast GCTGCTGAA

+ ZFA-unknown-148  
2291 gCAGAAAGCCc 2301  
2291 cCGTCTTCGGg 2301

| FINGER | HELIX   | TRIPLET | REFERENCE NUMBER | SOURCE |
|--------|---------|---------|------------------|--------|
| F1     | DSPTLRR | GCC     | -                | CoDA   |
| F2     | QQTNLTR | GAA     | -                | CoDA   |
| F3     | QGNTLTR | GCA     | -                | CoDA   |

#### ZF DNA Sequence

Bos taurus (cow) Build 3.1

Blast GCAGAAAGCC

+ ZFA-unknown-149  
2315 cTGTGTGGCTa 2325  
2315 gACACACCGAt 2325

| FINGER | HELIX   | TRIPLET | REFERENCE NUMBER | SOURCE |
|--------|---------|---------|------------------|--------|
| F1     | TKPILVR | GCT     | -                | CoDA   |
| F2     | RREVLEN | GTG     | -                | CoDA   |
| F3     | QRHGLSS | TGT     | -                | CoDA   |

#### ZF DNA Sequence

Bos taurus (cow) Build 3.1

Blast TGTGTGGCT

⊕ ZFA-unknown-150  
2330 gGGCGTAGCCa 2320  
2330 cCCGCATCGGt 2320

| FINGER | HELIX   | TRIPLET | REFERENCE NUMBER | SOURCE |
|--------|---------|---------|------------------|--------|
| F1     | DGSTLRR | GCC     | -                | CoDA   |
| F2     | QRSSLVR | GTA     | -                | CoDA   |
| F3     | ESGHLKR | GGC     | -                | CoDA   |

ZF DNA Sequence

Bos taurus (cow) Build 3.1

Blast GCGTAGCC

⊕ ZFA-unknown-151  
2335 aGCAGGGCGt 2325  
2335 tCGTCCCCGCa 2325

| FINGER | HELIX   | TRIPLET | REFERENCE NUMBER | SOURCE |
|--------|---------|---------|------------------|--------|
| F1     | KRHTLTR | GCG     | -                | CoDA   |
| F2     | RREHLVR | GGG     | -                | CoDA   |
| F3     | QTATLKR | GCA     | -                | CoDA   |

ZF DNA Sequence

Bos taurus (cow) Build 3.1

Blast GCAGGGCG

⊕ ZFA-unknown-152  
2338 aGGAGCAGGGg 2328  
2338 tCCTCGTCCCc 2328

| FINGER | HELIX   | TRIPLET | REFERENCE NUMBER | SOURCE |
|--------|---------|---------|------------------|--------|
| F1     | RRAHLQN | GGG     | -                | CoDA   |
| F2     | QSTTLKR | GCA     | -                | CoDA   |
| F3     | QKPHLSR | GGA     | -                | CoDA   |

ZF DNA Sequence

Bos taurus (cow) Build 3.1

Blast GGAGCAGGG

⊕ ZFA-unknown-153  
 2343 gGGCGAGGAGc 2333  
 2343 cCCGCTCCTCg 2333

| FINGER | HELIX   | TRIPLET | REFERENCE NUMBER | SOURCE |
|--------|---------|---------|------------------|--------|
| F1     | RQMNLDR | GAG     | -                | CoDA   |
| F2     | RQDNLGR | GAG     | -                | CoDA   |
| F3     | KNHSLNN | GGC     | -                | CoDA   |

[ZF DNA Sequence](#)

Bos taurus (cow) Build 3.1

Blast GCGAGGAG

⊕ ZFA-unknown-154  
 2352 gCAGAATAGg 2342  
 2352 cCGTCTTATCc 2342

| FINGER | HELIX   | TRIPLET | REFERENCE NUMBER | SOURCE |
|--------|---------|---------|------------------|--------|
| F1     | RRRNLQI | TAG     | -                | CoDA   |
| F2     | QQTNLTR | GAA     | -                | CoDA   |
| F3     | QGNTLTR | GCA     | -                | CoDA   |

[ZF DNA Sequence](#)

Bos taurus (cow) Build 3.1

Blast GCAGAATAG

⊕ ZFA-unknown-155  
 2355 gGTGGCAGAAt 2345  
 2355 cCACCGTCTTa 2345

| FINGER | HELIX   | TRIPLET | REFERENCE NUMBER | SOURCE |
|--------|---------|---------|------------------|--------|
| F1     | QGSNLAR | GAA     | -                | CoDA   |
| F2     | QSTTLKR | GCA     | -                | CoDA   |
| F3     | RKDALHV | GTG     | -                | CoDA   |

[ZF DNA Sequence](#)

Bos taurus (cow) Build 3.1

Blast GTGGCAGAA

ZFA-unknown-156  
 2367 tGCGGGTGGCc 2357  
 2367 aGCCCCACCGg 2357

| FINGER | HELIX   | TRIPLET | REFERENCE NUMBER | SOURCE |
|--------|---------|---------|------------------|--------|
| F1     | VPSKLR  | GGC     | -                | CoDA   |
| F2     | EAHLSR  | GGT     | -                | CoDA   |
| F3     | RLDMLAR | GCG     | -                | CoDA   |

[ZF DNA Sequence](#)

Bos taurus (cow) Build 3.1

Blast GCGGGTGGC

ZFA-unknown-157  
 2370 gGGTGCGGGTg 2360  
 2370 cCCACGCCCAc 2360

| FINGER | HELIX   | TRIPLET | REFERENCE NUMBER | SOURCE |
|--------|---------|---------|------------------|--------|
| F1     | TKQKLQT | GGT     | -                | CoDA   |
| F2     | RTDTLAR | GCG     | -                | CoDA   |
| F3     | HGHRLKT | GGT     | -                | CoDA   |

[ZF DNA Sequence](#)

Bos taurus (cow) Build 3.1

Blast GGTGCGGGT

ZFA-unknown-158  
 2373 aGAGGGTGCGg 2363  
 2373 tCTCCACGCc 2363

| FINGER | HELIX   | TRIPLET | REFERENCE NUMBER | SOURCE |
|--------|---------|---------|------------------|--------|
| F1     | RRLTLR  | GCG     | -                | CoDA   |
| F2     | EAHLSR  | GGT     | -                | CoDA   |
| F3     | RGDNLKR | GAG     | -                | CoDA   |



### ZF DNA Sequence

Bos taurus (cow) Build 3.1

Blast GAGGGTGCG

+ ZFA-unknown-159  
2389 aGGGCAGAGa 2379  
2389 tCCCCGTCTc 2379

| FINGER | HELIX   | TRIPLET | REFERENCE NUMBER | SOURCE |
|--------|---------|---------|------------------|--------|
| F1     | KHSNLAR | GAG     | -                | CoDA   |
| F2     | QSTTLKR | GCA     | -                | CoDA   |
| F3     | RTEHLAR | GGG     | -                | CoDA   |

### ZF DNA Sequence

Bos taurus (cow) Build 3.1

Blast GGGGCAGAG

+ ZFA-unknown-160  
2392 gGAGGGGCAg 2382  
2392 cCCTCCCCGTc 2382

| FINGER | HELIX   | TRIPLET | REFERENCE NUMBER | SOURCE |
|--------|---------|---------|------------------|--------|
| F1     | DRSQLAR | GCA     | -                | CoDA   |
| F2     | RREHLVR | GGG     | -                | CoDA   |
| F3     | QTTHLRR | GGA     | -                | CoDA   |

### ZF DNA Sequence

Bos taurus (cow) Build 3.1

Blast GGAGGGGCA

+ ZFA-unknown-161  
2447 gGAAGGAACT 2437  
2447 cCTTCTCTTGa 2437

| FINGER | HELIX   | TRIPLET | REFERENCE NUMBER | SOURCE |
|--------|---------|---------|------------------|--------|
| F1     | GHTALRN | AAC     | -                | CoDA   |
| F2     | RQDNLGR | GAG     | -                | CoDA   |

|    |         |     |   |      |
|----|---------|-----|---|------|
| F3 | QRNNLGR | GAA | - | CoDA |
|----|---------|-----|---|------|

ZF DNA Sequence

Bos taurus (cow) Build 3.1

Blast GAAGAGAAC

+ ZFA-unknown-162  
 2450 gTGGGAGAGa 2440  
 2450 cACCCTTCTc 2440

| FINGER | HELIX   | TRIPLET | REFERENCE NUMBER | SOURCE |
|--------|---------|---------|------------------|--------|
| F1     | KHSNLTR | GAG     | -                | CoDA   |
| F2     | QQTNLTR | GAA     | -                | CoDA   |
| F3     | RSDHLSL | TGG     | -                | CoDA   |

ZF DNA Sequence

Bos taurus (cow) Build 3.1

Blast TGGGAAGAG

+ ZFA-unknown-163  
 2459 gGTTGACAGGt 2449  
 2459 cCAACTGTCCa 2449

| FINGER | HELIX   | TRIPLET | REFERENCE NUMBER | SOURCE |
|--------|---------|---------|------------------|--------|
| F1     | RRAHLLN | AGG     | -                | CoDA   |
| F2     | DRGNLTR | GAC     | -                | CoDA   |
| F3     | HHNSLTR | GTT     | -                | CoDA   |

ZF DNA Sequence

Bos taurus (cow) Build 3.1

Blast GTTGACAGG
