# Supplementary material for: Targeting wild-type Erythrocyte receptors for Plasmodium falciparum and vivax Merozoites by Zinc Finger Nucleases In- silico: Towards a Genetic Vaccine against Malaria
Source: PubMed Central journal article supplement (PMC3500210; doi:10.1186/1479-0556-10-8), 2012-08-31
Supplement: 1479-0556-10-8-S2.pdf [file 1479-0556-10-8-S2.pdf]

**Zinc Finger Site Type:** Array

**Zinc Finger Engineering Method:** CoDA

**Sequence Name :** glycoporphin A

**Sequence Length:**31,451

**Nucleotide Sequence**

```
:nGCAGGAAGGTGGGCCTGGAAGATAACAGCTAGCAGGCTAAGGTCAGACA
CTGACACTTGCAGTTGTCTTTGGTAGTTTTTTTGCCTAACTTCAGGAACCA
GCTCATGATCTCAGGATGTATGGA AAAATAATCTTTGTATTACTATTGTCAGG
TAAGTGATTTTATTTTCATCTTGGTTCTGTTATATTGGGTATGAGATCATAGAA
TAAATATGAACTACCCTATTTTAGTTCTATCTTATTTAAATCAATAAATGAGT
AGTATTTCCCTCTTCCAGTCTGGTGGATGGATTTTACTGGA ACTCAGCTACCA
ATGTGGGGGAAATGGCACAAGGGAGCCCAGTATTTATGGCCAAATCCAGTT
TTCTAGTATGAGAAGCTTACTTCAATTCTAAGTCTAGCTAGAATTTAAATAAT
TTTATCAAATGCTATGAGAAATACCTCTCTGTGAATAAATGTATTGCTTTGTT
GAGTTATAAGGAGATTCATTTCCAAACTAAAGAGTTATTAACGAAGATGTTG
GTAGCTATATGGCTTTTAGTTTTCAAAGGTATAATTTCCATTTCTGCCAAA
TGGCGAGAAGCCAAAAGCATGAACACTGAAACCGTGGGGAGTTGTTGCTT
CTCTGTGGGTCCACTACTAAAGTGTACATAGGAAGAAAAAACA AAAACA
ACTCTTACTGGCTTAGGTATCCTGTGAATTTTAGGAGAAATTTAAATCCATTA
AAATAAAGAAATATCATAGGGTTATTATTAATTGTATTAATTCAATAATTTGA
ATTTAACTTAGTTTTAAATTTAATTATTAATTTAGTGTCTTAAATTAACATGATTT
TGGCCTCTTTCTGAGAATATTATAGTTAAACATCCTCTCAAGTGCAGTGCTTA
TGTGTTAGCAATACTAGTGCCCGACACAGCGGGCAGGCAGTTGCTTGAA
ACATTCTGAGTCTATTAGACATTGCTGTATCCCAAGTGAGAGCAAGTATCAA
GGAGCTACTGAGCACTCTGTAGCACACAGGGAGGAGAGATCAGCATTTTCT
AAGATACCCTAGGGGAGGATAAAATAGTGCAATAGTTAAGAGCACAGGCAT
GAGGAACAGACAGA ACTGGGTTCAAATCTACTTTTACTTCTCAAGGCTGGG
GAACATTAAGGCAAATTATGTGCCACATTTTTATGTGTCTCGTCTTTAAA
TGCAGGCAGTGTTGGTACTTACCTCATAATAATTGCATAAAGATTAACA AAA
TATTTAATGGAATACACTTACTGATGCCTGAAACAAAGTAAAATGTTAAGATT
ACTATGCATTTTCTGTGATTAGAATTA ACTATCATGATTA AAAAGTATTAATA
TATATTATTA AAAATAAGCAGTAGCTATCAATAGTTACAGACTAGGGAACAAAC
CTACGTATGTGATTGGTGATTTCTGAAAAGTCAGAGAGAAAAGAAAATTACA
GAAAGAAAACAGAAAACAAACATAGCTACTCTAATTTTTTAAGCAGAAAAGTA
TGAAAACATTTAGTTTGAAGAAAAGAAAACAAATGAAAGGGATGTAGTGTA
TATTTGTATATATATTCATATATTTGAAGTGCTATTACACAGAAAAAAGATGT
ATTCTTTGTGTTGCTCCATGGGGCAAACCAA ACTGGATGTA ACTCAAGCAA
ATTAGACACTGCATACTCTACTGGGGGTGTGCCCGCATTTGGGAAA ACTC
TGTGTGACTTACAAGTGCCCCAAATTTGGAAAGGGTTCCTGGCAAAGAAAT
GATTTTTTTTTTAAATTTCTACA ACTACACAAGCAGATAGTGTATTAAGCCTT
AAATGGCACTTGGTCACTGGGGCAAGATGACCCTGAAAGCTACAATGGTCT
CCAGTACCCAAGCTGTTATCATCTTTGTAGCTTCAGAAACCTCCAAGGAAA
CTCTCTTGATGTGGCTACTTTATAGTATAACAGAAAGGTGTAAGATCAAGTTT
TTCCCCATACTGATTAGCTGAAGAGTAAACATGGTGAAGTCTTTTTCTTTTT
CTTTTATGTTGCTATAAAAAAAGATGATTGCCTTGCTTTCTCCAGGAATCT
```

TAAGAATAAAGCCAATATTTCTAATTCTAAACTTACCAGAGATCTCCTTCCAA  
ATGGAGAATCCATTTTTCTAATATGACTTGATTCCCAGTCCCTGAATTCCTG  
CACTCATTTGATGATTCAGTCATTACATGTCAGATTGTGAACCAGACACTGA  
GCCCACAGCAGGAAGAAAAATGGGCTCCCATGGAGGATACACGGAGGGTA  
GGCGCAGTGGATGATGGGAGGGAACGCAGATAATAAATGGAACAACAATA  
TCTTATTAATAAAGATAAAAAACAGTCAAACTAATACAAAGCATATAAAACC  
AGGTAAGATGATAAACATGAATGCCGAAAGCTGCTTAAGAAAAGGGTAGCA  
GGGAGTTATTTCTGAGTAGATGACATTTATGCTAAATGTGGAACAAGGAGA  
CGGAGCCAACCCTGAAAATTCTGGGAAAAGAGGACAGAAGGCAGAGGGAA  
GAGCAAGAGCAAAAATTCTGAAACAGCAGGTAAGTTAGTGTTTTCAAGGAAA  
AGCTGGAGCTTTTATCTGAAAATCAGATTCTGAAGCTAAGAACCAATTTGAA  
AATACAATACAATATCACTTCGACTAGGAAATTATGGCATAAACCAGGAGTC  
TCCAAAAGCTTTTTGTGTTTACTTAAAAATTCATACAAAATTTGCATTCTAGGT  
CATAATATACTAATTTAATTGGAGGAAACAAAGGCACTGGTATGATATCATCA  
TGCTACTTTATTCATCCGTGTATCCCCAGAATCTAGCACAGTTCCCGATTG  
GTATTTATAGTAGCATATTGGTTGAATAAGCAAGGAAGGAGGTGAAGGGAG  
GGAGAAGGAGAGAGAAGCAGAGAGGGAGAGGAAGGAAGAAAGAAAAGGAA  
AAAGGGAAGGAAAGAAGAGAGGAGGGAGAGAGGGAGGGAGGCAAGAAGG  
GAGAAGAGAGAAGGGAAGGGAAGAGACAGGAGGAAGGGGAGGAGGAAAG  
GAAAGAGGAAATATTTGTTTTCATCTGGTTAGACACAGTGAGTGCTCCGCAT  
AGACAGATCATTATTACCCTGTGCATCTGACTCATACCCTGCAAGTACATC  
AGTCTGAGAAGCACATGTTAAGTGAAGAAACAAGGCATCTCTTTTTTTTTTT  
TTTTCAGGGATCCAAGAAGAGAGCCTTGCTAGCTGCTATTTAATTGGCACAG  
GAAAGAGTTACAGGAAGTGTATGCCAGGGAATACATGACTATAAATCTTTA  
AAAGCAAAACCTGTGTCTTCGCTTATGTGTCCCACACATTGTCAGCCACATA  
GTAGGCAGTCAATATCAACTACTCAAATGACAAATGACAAATGACCAGAAT  
TCTGCGGCAGACTAGTTTAGCCATGAAAAATCATTAAACACCCGTGGGCCTC  
AGTTTTCTTGTCCTATTCAATAAAGCGCCGAGTAGATGGTATCTACAAGCA  
TTTTCAACTGTAAACCCCAATGAATCCCCAAAATTCAGCCTGAGATGAGCT  
GGACTAGTTGCCAAACCTATAAATATCTTTAGCATGGTGTGAAATAGGGTTT  
TTAGAAAGAAACAGACACCCACTGTGAACTCCTTTGCAGAAAAGGTCTGAAT  
AGAGGGGAAAGTAGGGATGGTATCTCAAACCTACTTTGTAGTGATTTTAAAT  
TAGGAAATTTAGCTTCACATTCTTGTGATAAATTTCTTTTACCTTGGTTTCTA  
GAAGATTATTCAAACATCTGTGAGACTATTTGAGAAGTATACTTTTGGGGA  
ATTTCCCAAGTTATCTTTATAGATTATTTTTGACATCAACTGCAATGTAAT  
ATCTTTTACTCAAAAAAACCCAATCCTACTTACATGGTGCTGACAAAATCAG  
GCTGGACCTACATTTTTACATCATAGATTTCCAGCCATTATTATCATATCCAC  
ATCTTTAGTAAGTACCTATCTGTGTAGTTTTCTGTGATAAATGAACTAACTA  
AACTAAAGCAAAAATGTTGAAAAAAATTCAGGTTTATCTCTGAGTGTTGG  
GATTGCAAGGTTTTTTTTTCTCATTTTAAATACTTTCTAAATTTTCTGCAAAGA  
GAACCATATAATCTAATCAGGACAAGTTTTAATATATTTTAAAAGTAAACCG  
AACAAACACAATCTCTGCTTTCTAAGAAGTCTTTAATTTTTGTACGTTGGTCA  
TAGACTATGACTATAAATTTATTTGTGATATGTATTAAGAATTTCTGTCTAAC  
CCAAATTATTATATGTAAGCACGGGAAAAATGATGTCATCTTTGTTTGTAGTG  
TACAAAGTTCTATAAACAGCTATTTGATCAACTTTGGTATTTCCATCCCTAGA  
TTTATATACAGCAGGTTAGGTTCCATACAGAGGCAGGTTCTGAATAATAATA

ACCAACACTGATAATAGCACTTACTTTGTGCCGTGCACTGTTCTAAGCAATTT  
ACATACACTTAATTTTTAAAATTGTAGTAAAATACACATAATATAAATTTACCA  
TTTGAACCATTTTTAAAGTGTACAATGGGTAGCATTTAATGCAGTCAAAATGAT  
GCACACCCATCACCATTATGTAGCTCCAGAACATTTTCATCACTCCAAAAGG  
AAACCTCTTACCCATTAGCAGCCACTTCCAATTCCTCCAGCCCCTGGAACC  
ACTAATTTGTTTTCTACATCTACAGATATACCCATTGTAGATATTTTCATATAAA  
TGGAATCATATAATAGGTAGCCTTTTGTGTATGTCCTCTTTCACTTAAAATAA  
TGTGTTTAAAGTTCATCCATATTGTAGCATGTATCAGTATTTTCATTCCTTTTAT  
AATTGTGTTGGTATATCTCATTTTGTTTATCCACCCATCATTGATTAATAATTT  
GGGTTGGCATATCACATTTTGCTTATCGATCCATCATTGATTAATAATTTGTG  
TTGTTTCCACCTTTTGGCTATTGTGAATAGTGCTGCTATAAATATTCCTGTAC  
TAGTTTTGTTGAACCCACTTTAATACTCAAAGATGTATAGGGGTAGAATTG  
CTGGGTCATAGTAATTTTATGTTTAACTTACTAAGGAACTGCTCAACTCTTTT  
CCACAGGAGCTGCACCTTTTGACCTTTTCACCAGGGTGTATGAGGTGCCAA  
TTTCTCCACAATCTTGCCAGAAATTGACTTTTTTCATTTTTTTAATTATAGCCA  
TTTCAGAGGGTATGAAATGGTTTTTCACTGTGGTTTCTTGCATTTTCCTAATA  
ACTAATGACGCTGAGAATCTTCTCATGTAATTGTTGGTAACTGCATTTTGCAT  
ATCTTTGGAGAAATGTTGGTACTAGTCCTTCACCCATTTTCAATCTATTTTT  
CTTTTTGTGTTGCTAAGTTGTAAGAGTTCTTTCTATGTTCTGGATAAAGAGTC  
TTATCAGATACTATTTGCAAATCTTTTCTTCATTCTGTAGATTTTTGTTTTT  
ACTTTTGATAGTGTCTTTGATGCACAAATGTTTTTCATTTTCAAGTCCAATTT  
ATTTTTTTTTCTTTGCTGCTTACGCTTTTGATATCATATCTAAAAATAATTGC  
CAAATTTAAAGTCATAAAAATTTCTCCCTATGTTTTCTTCTAAGAGTTTTGTAT  
TTCTTCTCTTATATTTAGATCTTTGGTTTATTATCAGTTAATTTTTCTATATGAT  
GTATGATAAGAGTCCACCTTTATTATTTGCAGCTGTCCCAGCACCATTTGTT  
GAAGAGACTATCCTTTGCCATTGAATGGTCTTGACACCCTTCTTGAAAGTT  
AATTGGCCATGGATATATGAGTTTATTTCTGGAGTCTCAATTCTATCCTAAGA  
ATATGTCTGTTCTTGGGGCAAATCACACAGTTTTTATTGCTGTTACTTGGTT  
ATACGTTTTTAATTCATGAAGTGTGATTCACCAAACCTTTGTTCTTCAAGATTG  
TTTTGCCTATTTAGATCCCTAACAATTTCATAGAAATTTTAGGATTAGGTTTTT  
CATTCTTGCAAAAAATAATTATGTGCATTTTAACTTAACTGTTCAATAACTC  
TATAAGGTAGAGACTAATCCATGTATAATGATGGAACAAAAATATAGAGATTA  
AGTAAATTTTGAAGGTCTCAGGTAGTTGCTAGAGGAATTAGTTTGAGCCTA  
GGCAGTTCCACTGCAGAATCTGTGCACTTAGAGAATATGTCATGTTGCCTGT  
ACCATACCTAGTGATGTTCCAGGATTGGCTCCTTTACTCTTACAACATTGTCA  
CTCAGTGTTCTGCCTGTGCTTTCACCAAGCTGAAGACTTTAATGAAGGTTGA  
CGGTCTGTCTTCCTCACGTGGTGCAGCTAAGGAACTCTAACTGTGTGGCTG  
TTATGTTAGCCTTTTGTCTCTTTTATATGGGCTATAGAAAATGTTTTTAAATC  
CTGGAGGCCTCCTTTTGTGTTATCACTTATTTCCAGTCATCACTATATTTT  
TAAAAGCCAAAATAGAAGGAAATAAATACAAAACATAAAAACATGAATAGTACA  
GCTATTTGAGGCAACTGAGAATAGAGATCATGGCACTGAAATTGCATTTTGC  
TAGGAAAAAGACCACAAAAGTTCTCCCTTGCTACCTTTCCTGAACTATTCT  
GCTAGATTCAGACTTCAAAAACATTGTATCAGGAAATACAGAAATGTTCTTTC  
AAAATGAGTGTATGGGAATGTGGGAATGCCTAATAAATCTGTCCTCATTGA  
TTCGTTAGCAAAAATCATATAAATCAATACCTTGTGATTGCAAGCAGATATAT  
TTCAGATCCTTTCTGTGTTTGTTTTTTGTCTTCTTGATCTATCACAAATTGGAG

AAAAC TTAAAATTTCTCAATGGTATTGTATTTTTGCCAATTTCTTATTCTGCTT  
TATGTTTCTCGTTGCTATATTATTGGGCTATAATGGTCCATAA TACTTAAGA  
ATCACTGTGAAATATATTGCTTAATGACACAAGTAAATCTTTTTCA TTGTTTGT  
AATGTCTTTGCTCTTAATTCTACTTTGCCTAAGATTAATACGGTTATTCTGTT  
TAGTTTTATATGTATTTATTTATTTATTTTGAAGATGGAGTCTCGTTCTGTGCGC  
CCAGGCTGGAGTGCAGTTGCATGATCTCGGCTCACTGCAACCTCTGCCTCC  
CGGGTTCAAGCAATTCTCCTGCCTCAGCCTCCCAAGTAGCTGAGAATACAG  
GCGCACACCATCGCGCCCAGTTAATTTTTGTATTTTAGTAGAGACGGGGTT  
TCACTGTGTTGCCCATGCTGGTCTCCAACCTCTGAGCTCAGGCAATCCACC  
TGCTCGGCCTCCCAAAGTGTTGGGATTACAGGCATGAGCCATTGCACCAG  
TCCTAACCTATCTCTTTTGA CTCAATCTAAAAGTTTCTGTCTTTTAATAAAAA  
CCACAATCCATATGCATTCATTAATTCACA ACTGACATTTAGTATCTTATTTCT  
GTTATCCTATTTTCATATTTTATGATTCTTGTTTCTGCTCTTTT GATATATAAAT  
TATGTTTTATTTGCCCTTATCCTTTTCATGTGTTTCTAAAGTATATAGCCTACGT  
GTAATTGTCCATTAGCTAACTTTATGTTTTT GAAAGCATTCTCTCTCAGAAT  
TCCCATTTTAGTGGTGCAGCACACATAGAAAGTCTAAGTGCTTTCTGGAGCT  
AGATAAGCTGGATAAAGGTGTGCATGAGCCACTGGTCAATGGCTTGTGCAG  
GCGGTGAGTGCATTTCTGGTATTTTCATATGCTATTGATCTGGCAGCCAGGTA  
TTCAGATAGGGTATAACCAGGTTTCATCAGGCTCAA AACATAATCAAGTATTA  
TTGAGACATAGTTAATGTGCACTACA ACTCACAGCACACAGGCTCACACACA  
CACTTGTCTGAAATAAAATTCACAAAATAATACCTTCCCTTATTCTGTGTGA  
TGTACTTTGATATATTCTCTCCTGTTTTATACA ACTTAATTTTTTTTAGAGAAA  
AGATTTTGCTCTGTGGCCTAAGCTGGACTGCAACGGCACAGTCATAGCTTA  
CTTCAGTCTTGA ACTGCTGGATTCAAGTGATTCTCCAGCTTCTGCCTCTCAA  
GTAGCTGAGACTTCAGGTGTGCTCAACCACACCTGACTAATTTTTTGGTTAT  
TTAATTTGTAAATATGGGGTCTTGCTATGTTGCC CAGGCTGGTCTCGAGCTC  
CTGGCCTCAAGCGATCCTCCTGCCTTGGCCTCCCAAAGCACTGGGGTTACA  
GGCATGAGCCACCACACCTAGAATACAACTTAATTTTTTAGTGCCAGTGACA  
ACCCACTGGACTGATTTCATAACCCATTAGTAGAGGAATGCACCATCTTGAC  
TGAAGGTTGGAATTTTCTCAGGGAATCTATGTAGCACTGATGATTGGGTTTC  
ATATCCAGAGATTCTAGTTATGCTAATACAGAGGCCAAGCAA ACTATAGCCT  
GTGAATGGCCGGCCCCCTGGTTTTGTATACCTTACAAGTTACAAATGATTTT  
TACTTTTTTAAGTGCTTAAAAAAACCAA AATAGGCCGGGTGCAGTGGTTCAA  
GCCTGTAATCCCATCACTTTGGGAGGCTGAGGCAGGCGGATCACGAGGTC  
AGAGGATCGAGATCGTCCTGGCTAACACAGTGAAACCCCATCTCTCCTAAA  
AATACAAAAAATTAGCCAGGCTTGGTGGTGGGCGCCTGTAGTCCTAGCTAC  
TTGGGAGGCTGAGGCAGGAGAATGGAGTGAACCCGGGAGGCAGAGCTTGC  
AGTGAGCCAAGATCATGCCACTTCACTCTAGCCTGGGCAACAGAGCAAGCC  
TCTGTCTCAAAGAAAAAAAAAAAAAGAAAGACACAAAAAAAATCAA AATAATAAT  
AATAATATGTGAATATTATATGAAATTCAAATTCTACTGCCACA AATCATTAT  
TGGAACATAGTCATACTCATTTATTTATGCTTTGGTTTACATATTGTCTGTAG  
CTGCTTTTGCACAGTGACAGAGTTGAATATTTGTAATAGATGGTCCACAAAG  
CCTAAAGTAGTTGTGGCCACAAATCCTAAAGTAGTTACTCTCTCTCCCTTTA  
CATAGGAAGTTTACTAATACTTGTGCTAAGGGATCTCAACAGACAATCTGAA  
AACTTAAGTTTTAGACTAAAGATTTCCAATCTAAATTCCTGTGGAGCTTTCT  
GAAGCTGCCAGGTGGAGATGGGAACAGGTTGTGAGGCTGCAGGCCAAACA

CTCAGGCCAGCTTCCACCAAGCAGTTCAACTCTGTCTGTTTCACACACTGAT  
GAGCTTATCCTTGGAAAGTGATTAAGTAAAATTAATGCGAATTGAGGGAG  
GAAGTGAGGGAGACTGTGGCTCTAAAACAAAACCCTAAGAACACCAACAT  
TTAAGATGGCAAATGATGTTATTTCTAAAGTCGTTACAGGCTAATATCACATAC  
TATAGCTGTTCACTTTATAGATAAAGGTGACACTACAACCATAGAAAATGTAA  
GAGTGGACCTCGAAACTCAGGAAGATGAAGTTTACATATATTAATCTATATTA  
CCAACTGGAGCAGTTGTTCTCACTGCTGGCCGCACATCAGAATCCAATTCCT  
GGGATATCACAGATGATTCTACCATGCAGTCAAGGATGAGAACAAACTAGG  
TTCATTTCTGCAATTTTTTTTATTGTTCAACCAGTGAAAAGGAAGTACCAGTGG  
TGTGAGAACTTTGGGATAAAGTTTTTGTTCATTAAAATTATTTTCATCCAG  
CCCAACTTCCTTAAGCCCAAATTTAATGTGTGTGAAGTTCAGCTACAGAAAT  
ACCAAACCTTAGACTAAAGCGGACACAGGTAAAATATGTGAAATCCTCTTTT  
GTTCTGAGGATTCCTTAGTAGGCAGGAGTGACCAGATAGGAATATGCTTGG  
CTGGAAAAATTAAGATTCAAGTTAACAAACTGTTAATAACCAGGACCATCTG  
CTCTTCCGTAATGTGGATTTGCCACTGCAGGTCACCCTACAATGCTATGTTA  
GAGGTACAACACTCTTACCCTCAGGCTATAAACAAGGTGAATTATTATCTTTA  
TATCTCTTCATTTAGCCCTGATTTGCTGAAGTGAAGGCTCGCTTGAGAGTTG  
GTTGCATTATAATTTGGTGAGAATTTAATCTCTCAATGACAACTTACTTGATT  
CCCTCATTCTCTTTCTGCTACATAGATCACAGTAGACCTTGGCAGACAGTTC  
TGTAGTTACATAGGTCTGAATTCAAAATCCAGGTCTGCCACTTGGTGGCTGT  
GTGAACTTAAGCAAGTCAGGCAATGCTTCTGATGTTTTTTTCTCCTCCACA  
AAGAATAATTAACATATAACAATAGGGTCTCAGCTAGTTGTTTTAAAATGGT  
TAGAGAGATGTGTGGAATGAAGTAAGTGTGCAGTAAGTGTTAACTACAAATA  
TTATTATCTTAGACATACAGATTTCCATGATTCATGAATGGTGAAGCATCTTA  
GAAGACATCCATTCCAGGCCAGGCATGGTGGTGTGCACCTATAGTCCAAGT  
TGCTCAGTAGAATGAGGCAGGAGAATTGCTTGAGCCTAGGAGTTTGAGGCT  
AGTATGGGCAATATGGTGAACCCTATCTCAAGAAAAAAGCAAAACATTTTT  
TAAAGTTTAAAAGAGAGACATCTGTTCCACTACTCTCATCTTAGAGGCCAT  
AAAACCTGAGGCTCAGATAATTTAGAGACTTGCACAGATCCCCCAACCATTT  
GGTGGCAAAGCCAGGAAGAGAACTCTGCTCTCCTTTCCACTGGGACAGTG  
GAAGAAATTCGTCTTGATTTCCATCTGTCCAGGCTGAAGAATGTGCACTGGC  
TGGAATGACAGACTGACCGACTTTTTTTCTCCACCTCTGCTGTCTCAGCAAT  
GGTTTGGGACAGTGTGGATGACCAGAAGCTGGATAGTACAGAGCCAGGCT  
AAAGAGTTCAGGCTTCCTGAAGGGAAGCTGCAGTCCTCCTAGGCCACAACA  
CCTTCGAGATAGAATACATAAAGCACCTTCTCTACCAAGTTAGGAAAGGAA  
GAAGTGTGACCAATTAGCTGTATGGGGACTGCCAAAGCATGCCAGTCTGAA  
GATGAGCAGAACTGGCTCATTCCATTTGGCACCTAGCACACTAACTGCATC  
CGTTAATAGGCCATGCTTTTCTCCAGAGCCATTGGCTGAAGAGATCAAATAA  
AAAGTATTGAGAATAGGCTACCCAAAACAGTAGGCTCAGATGCTATCACACA  
AAGCACTTTATCCTTAAGTTCAATTTTTCTAAATTGTAGTTGGCTGCTTTGGC  
TTAATAAAAACCTTCCAAAAAAGAAAAACGAATGGCCACAGACAGTATGGGTA  
TCTAACTATATTATCACAACCTTGACCAAGATTGAACTTGCCAATCCTTTGGTT  
CAAGAGCCAAACAAAATCGTTCCCTTAAAATATTGCTTCATGGGAACAGTCT  
TCTTCAAACATCTTTTAGCACAGGCAAGATTCCCATTTATACATTAATTCTGT  
TCAAGACAATGAGATTGGGCAGAAAAGGCATTGAGTTGGAAGTCAATGGAT  
ATGAGTTTTTATCCCAGTTTTACCACAAATTAGCTGAGCATAACTTCCACAGA

TGCATTTATCAAGTAGTTTTTCATGGTCATTGCAATGCCAAAAAACTGTAGCAT  
TTAGAAAATTTAGTTTTTCAGACTTGGAACCTATTTAAGGCATTTTCATATGAAG  
GGTGTGTCCTTGTGAGAGTTTGCTTATGCAAGATAAAGGCTTCTTTTCAGCTGC  
AAGTCAGGAGCGAACCAAACTCAAAGCAGCAGCTGCATGAGCTGACTTTA  
TCACATCTTGACAAGAGCTCAGCCACTGGAAGTTTTGGCATAACAGCGAACT  
GAAGCGTACTTATACAATATCACATTTTATTTTTATTGTTTCTAATAGCATTCC  
AGGTTAGAAATGTCAATTATTTGGGAAAGCTGAGGGTCTGGTAGATAAAGCA  
TGCAGCAGAGAGCTAGGAGGCTGGCTATTTCCAGTCGTTATCCTAACATGT  
CTTGGGCCCCCAAGTCACCCACCTCCATGGTACAATGGGAACTGTGGCAG  
AAGTCCACGCTCTCTCCCCAACACATGGGGATAAGAGACAAGAGAGGTGA  
AATGTTCTGGAACATATCCGATGTTATACAAGTATAAGCTGTGAGATGATCC  
AAACGCAAATATTGAATATTTCAATTTCTAGAAAGTATACCAATTCATTCCAC  
CCTTCTCAAACCTAAATTACAGAATTCATTCAGGTCACACAGATTTACTTTG  
TACTAAGTACCATAGCAAATGCCATTTTCAGTGCCTGAAAACCTGAAAAACATA  
AATTTAAAGTAGGAGTTTGAGGCCTCACTAATATGACAAAACATACCTTTATA  
TTTTATTTTGCAGTAATTTGCCACTTAATCATTAACTCTTATCAATCTGAGAG  
ATTTGCCAACACTTGCCTGCTAGGTGACCTAAGCCTCCACATCAATGCATGT  
TATACTCCCCTTTCTCCATATGTTAGGCCCATGCTATTTCTTTATCCCTCCTC  
CTCTGCATCTTCACCTAAAACCTCTGCCCATCCTTCAGGGTTCATCCAGTGAT  
TCATTTGCAAGCAGGCATGGGGTAAGGTCTTCAGAGTATGTTTCTCAGAGG  
CCCATGCAGCTAAGAAAATGTGCAGTGTGGCACAAGGTCTGTCTATTCT  
GGGTAGCCAGATGCTGGACACATCTTTCATAACACCACAAGGTAAATATACT  
TCACTTGGAGAGAGAGGTGAAATTTTTGCAGGTATAGACTGGATGTGTTCCCT  
GCCAGAAGATGTGAAGGGATTAAGAACTGACTCTCATCTCCGTATTGCTAG  
AGCAAACATAATTTCTCATAGTGGCTATAGTATAAGGACACTGAGGGGTAA  
GAGATATAATCTAAGTAATACAATAAATTAGTGTGGAAAAATCATCAAATGA  
AGACTACATGGTTTTTACTAAAATTCTAGCTTTTLAGGATGTCCAGGGAGCTC  
AGGAATTTAGCTGTCCTTTTTTGTATGTACAATATGCCCAATGCTTGCTGAC  
TAATGTACTAAAACATTAGAGAAATCTTGCTGACAAGATCTCAACCAGTCAG  
CGAGATCCGGAAGGTGAGACTAATATTGAGGGTCAGCAGAATTAAGTCTCA  
GTTCTGCTGCTTACCAGATATGCTGATCTGAGCTAGTCATTTAATTTTTATGA  
GACCAAATGTCTATCTGTAAAGTCGGCAATTTGGATTAGATGTGCTGCAAGT  
GGTTTTCTAGCTTAAATGTACCTTCTGAATTC AACAGGACAATACTTAACTG  
ACCTTTAATCTAGGAATGACACAAGTAGATTTTTGAAAGCTACTTTAGCTACA  
GAAAGCTGAGAGCACCAAAGGCAAAGAGATAAAAATAACAGGAGAGCCTTC  
CCTTAATCCAGTCCCTAAGCAGTTTTTGGCAAACCTAAAGTTTTGTTGTTCAATG  
GTTACGAGTTTGCTTCAATGCTTTCTACCCAGTTTACTGAACTAAATAGTATA  
TAGCTATAGTAAAAGTCCATTCAAACACCAGCTTCTCACAGATATTTTGCA  
GCTTTGCAGAATTGAATATGTCCACAGACGTCTATTAGCTGGTTAGGGTCTT  
AGGAATCTAGGAGAGCCAAGTAGTTGTGTGAGCTGTTGTTATCAAATGTAGT  
TTTGAACATTCTTGGTGATTTTAAGGGATCATATTGTGGAAATTTGGTTTCCT  
TACCTTGAATTTTGAATGAAGCTTTAGAATTTGAGGATGTTTCTTTGGTTTCT  
CCTTCCAGGTAAGTGATTTTTTTTTTTTTCAACCAGATGCTGGTTTATTTAATT  
TGAAGGTATTGATGAAATCTTTAAATTGCCCCCATGTGATTCTACTCTGGAA  
TAACTACGAAATTTTAAAAGTTAATTAACAAGAAAATATGAAAACCTCATT  
TTTATGGGAGCTATTGTTCCCTTCAAGATGACACTGTTTTGTAACTATAGACT

TCCAGTAACAAGCCTCTGTGCCTTCTTCTTACCACTAAGCATGCATGGGTAT  
TAATTCCTACTGAAAGACTTATGCTATCTTTTTTCCAGAAATGGAAGAAAAAT  
GAACTATGAAAAAGGTCATTTTATAGGTCAGCTACCACTATGAGATTGTTGA  
GGAAATGATATAAAAAACAATTTTTATCAAATTATCTTTAGGGCATTATATGT  
TTATTTTCTTACTATGTTGACTTAGGTGACTATAAGAAGTTGTATCAGAGCAA  
CTGATTCTGGTGAATTAAGCAAGTATTTCTAAGAACATAAGTGGCAACTTTC  
AGTCTCAAATCAATTTGGCCACCAATCAGTTTTTGTAAAGGGTACAAATAGGA  
CATAACATGCTCAGATGGGACTTGGATAAAGTGTATACAATTTTACATCGAG  
GAAATTGTGTCAATGTGTTACCTTCAATGTTAGAAATTCCCAAGTTCTGACAA  
TAGTTCAGAGCCTTGTTAAAAGCCAGAGTGGAGGCATGTAGATCCAGCTGG  
AAAGAGAGGCATTATGGTCTAACTTAGGACAAATTTTAAAGCCAGTGTTAGG  
GTCTGAGTCCAGCTTTGTAACCTTGAGTACAGTGTTTGATCTCTGGGGTTTC  
AGCCTTCACTTCAGAACAAAATTTCCACCAAGTGCTCTTTTACTGTGAGGAG  
TAGCTGTTGAAGAAGAAAGAAGTCTACTTATTTGCTAGAGTGTTACAATTGTT  
TTGATAAAGCTCAAACTTATCTAAATAAGCTCTCTCTCCCTAAGCATGTTTT  
CATTTTTATAAAAAAGTTACATATACTTTGCTTATAAATTTAAAATACTTTTAC  
CTCCTCTGACTTCATTTAAAATTTAAAATAATTAAGTGCCAATTTTAAAGAGAT  
GTTAGCTCCCATTATTGGTTCCTTTGCCATATTCTTTTGACAACCTGCTGTAAT  
TTTCTGCCCCCTTTAAAGCCTCAGGCTATAGGCCTTCTCCACCAAAGGAATA  
TTAAGAAGTGATAAGGACCTTCTGTGAGCAGAAGTGGCTTGTTTGCAAAGG  
GACTGCTTATCTTGGCCACTCTTGAACACAAGATGGGACCCTCTACTGCAA  
GCTCTGGCATGTTTTTTTTTCCCTAAGTTATCCTCCATACTACTGACAGTGA  
TTTTCCCTAAATAAAAAACTGCTTCAAACCATTATTGTCTTTCCACTGCCTT  
AAAGATAAAGTCCAAATTCTAGAACATGGCCCACAGCATTGTTGGTGCCTCACC  
ACCTCTTCAGCCTCTCAGTTGCTGTTACCCATTTCTCTATTCTCTCCTTCT  
CACACCTTGTGCTGCAGCCACATAGATAACCTGCAGTTTTTGTAAAGTGCAA  
TGATGTCTCAAATCCAAGGCATTGCTGGTACCACACAGCCTGCCTGGTAAA  
ATCCTAGACTTCTTTCAAGATAAATTCAAAGACACCTCCATGAGGTCTTTCTA  
CCTCTCCAAGTAGAGTTGACCGCTGTCTCCTTTGTGTCCCCACTTCCACCAC  
CATCCTAAAATACTTATTATACTTAGATTAATAATTGTGCTCTTACTGCACTG  
GAATTACCCTGAAAGGAAAGGCCATGTATTATTTATCATTGTCTTCTAGTAC  
ATAGCCCACAGCCTATACCTCCCACCCCAAAAAAACCTTTTGTAAATAATT  
GAACAAATTAAGAAACACCCAAGGCCCCCAAGTAAACATCAAGGCCTAAGGA  
ATGCATATCTGGATTCTAAATAATCATAAGGTTTTACAACACCATGTTAAGCA  
CCAGGGACTTCAGAGAGCTTTTAGTCTAAATCTTATTAGAGAGGCCAGCGAA  
GACCTCCCAAAGGAAGTGGCATTGAACTGAGACTTGAAAAGCCAGTAGTTA  
GGCAAAGATAGGGAGGGAAATATTTAGACGAAGGGAGGAGATGGCACAA  
GATTTAGGACACGGAAAAGGGTATGGTGCAGTCATAGAGAAAACAGATGTG  
CAGAATGGCTGGAGCCCCAAGAGGGGAAGGGGAAGGGCGAAGCAATGAAGAT  
GTGAGGCAAGCAGGACTGGACCATGCAGAGTCTTGCAGATGTTACAAAAGA  
AAATTGCAGCAGGTAGTCCCTAACATCGTGCTGAACAGTTAGGCAACTTGG  
AGGAATATGTATATTTGTACTCATAGTCAAACCCTAGATGGCATTACAGA  
CTACGTTTTGTGTATTTTTATTTTTACTTTTTGTTTTTTTTTTCTTATGTTAGC  
AAAAGTATGCTCGCTATTGAAATGTTGAAAATATTTATTGGTCTTAAAATGA  
TGCTTATTTTTCCAGATGCTTGCATTATTCTGCATGTGCTATTTTGTGATGT  
GGTTTGCCTAATTTATTAACAATTGTATTAATTAATATATTAATTATAAATTG

ATTAATTTATAATTAATTATGTGTTATAATTAAGTTAAATTTATTAATTACTTAA  
ATTATTATATTCACATTCAGATGCAATCTGAAAACCCATTTGTTCTCACACTG  
CTATAAAGAAATAACTGATACTGGGTAATTTATAAAGAAAAGAGGTTCCATTT  
GACCCAGCCATCCCATTACTGGGTATATACCCAAAGGACTATAAATCATGCT  
GCTATAAAGACACATGGACGTGTATGTTTATTGCGGCACTATTCATAATATC  
AAAGACTTGAACCAATCCAAATGTCCAACAATGATAGACTGGATTAAGAAA  
ATGTGGCAAATATACACCATGGAATACTATGCAGCCATAAAAAATGATGAGT  
TCATGTCCTTTGTAGGAACAGGGATGAAATTGGAAATCATCATTCTCAGTAA  
ACTGTCGCAAGAACA AAAAACCAACACCCGCATATTCTCACTCATAGGTGGG  
AATTGAACAGTGAGAACACATGGACACAGGAAGGGGAACATCACACTCTGG  
AGACTGTTGTGGGGTGGGGGGAGGGGGGAGGGATAGCATTAGGAGATATA  
CCTAATGCTAAATGACGAGTTAATGGGTGCAGCACACCAGCATGGCACATG  
TATACATATGTAACCTAACCTGCACATTGTGCACAGGTACCCAAAACTTAAA  
GTATAATAATAATAAAAATAAAAATAAAAATAAAAATAAAAATAAAAATA  
AAATAAAAATAAAAAGAGGTTTAATTGCCTCATGGTTCTGCAGGCTATACAAGA  
AGCATAGTGCTTCTGCTTCTGGGGAGGCCTCAGGAAACAATCATGGCAAAA  
GACGAAGGGAAAGTAGGCACGTCTTACATGGTTGGAACAAGAGCAAGAGA  
GAGAGTGGGGAGAGAGAGCCTTGGAGCAGGAGCAAGAGAGAGTGGGGAG  
GTGCCACACACTTTTAAACAACCAGATCTTATGAGAAATCACTATCTCCCAG  
ACAGCATCAAGGGGGATGATGTTAAGCAATGAGAAACCAGCCCCATGATTC  
AATTACCACCCACCAGTCCCCACTTCCAACATTGGGGATTACATTTCCCCT  
GAGATTTGGATGATGCCACAGATCCAACCATACCACTCACCTAATTCCTTC  
TACGTAAGAATTTGTCCAAGCATTATAACAATTAGCATTTCATTTAACATCTT  
TTATGAATAAAGCACTATTCTCATGCTGAGAAGATTCAAATAATGGGAAATT  
GAAGTCCTAGGAACAAGTTTTATGTTTCAGAAGAGCCCATTTGGTATCCACA  
GGGCTAAGAAATGTGCACCCTAAATGTAAGTGGATTACACTGAACTGAAAG  
GTGTAAAGAAGGAGTGGAAAGATTAAGGGAGAAGCTTGGAGAGGATGAAAG  
TTAGAAATGGAAGTGACGAGCACACCTGAGTGAAGGATGAGAGCTCCAGCT  
GCATTTTCCAGTTGTATTCCCATGTTGCTGAGCCAAGGCTGATCTCAAGTT  
TATTGTTACATGCCCATTTAAGGCTTCTGGCCATTAACACTTTTGATTTTTTTT  
GGCTTGTGTTTTACTAGCTATTTTCAACAACACTTTTCATAGCTAAACCTATTTT  
ACTCAGATTGTATGCCTTTTCAAAAATACAATAGAAGGTCCATATTCCATTAT  
CTAGAAATAAGCCAAAGCTCATATCTAACATTTATTAAGAGAGATGGATTATT  
TTTGTTTATTAGTTATCTTTATAAATAATTTTTACGTACTTTAGTTGACTCATAA  
AGATGTTTCTTTCTGTAATTTTAATCTTAATATTTGTTGAACTTCAAATCCCT  
ATCACCAGGTTATTGTTTAAAGCATTGGTTTTTATATTATCTTAAAAGCCATT  
ATACCTGAGTGCTGAACAACCTTAGAAACATTCAGTAATTGTTTTGCATGCTAT  
TTAGTGAATTCATATGGCAATCGTTTATACATACATGATGGAATCAGGTGGC  
AGGCCAAGTTAAAGAGCAAGGCCAGAAAAGAACTTAAAAGAGAAGAGAAAA  
AATAGACAGTTTAGGAACAATAGATCATGTCTTCTCCATGATTTGGAGGTAA  
ACTGATTACCTATCAGCTGATAAATAGAGGAAGGTTTTAGAAGTCTTCAGTT  
GGGTAGACTAATGAGAGGTGTCAGAGAAGATGTTTTCTGTTGTTTGTGGGTT  
CTCCAGGAAACTTTGAGCATTGAGCTGAGGGGCCAAGTTGGCTGCCTCTGA  
GAAGAAGCCCTTCCACCTCCACTCCATTGCCTTGGGTGCCATTCCCCTCA  
GTTGAATATCTCCAAGAGATGAGCAAATGTACATCTACAGAGTTCAGGGTAC  
TGACTTTTATCATAATGATTTATAACTCTCAGAAGAGTGAAAACACATGAAT



GCACAGAATAGGAGATTGAAATATAAACCACAGAACATTCATACAATGGAAT  
ACTCTGCAGTCATAAAAATCTTCTCATAGAAGAATATTTGACAGCATAGGGA  
TATCTGTGGCATATTAAGTAGAAAGTCAGACTTGTAACATTATATACATATT  
CACGTATATTTAAACACCCATGATCCCATATTTAGATATAACAACCTAAAAGTTC  
AGATGGCTATATATCAAATGTGTCAAATGTTCAACCTTGCATAGGCTGACT  
GTAGATGAATTTTATATTATTCTTTGTGCTTTCTTGTAGTTCCCAAATTTTCTT  
TACTGAATCTATATTACTTTTTGCAATTTAAAGAATTTAATTTATAAAAATTTTATA  
AAATAACTTATAAATTTGAAATGTATTGCATTTAAGAATAAAAAGTGTTTAATT  
ACAAAAATAATTCACAATTTATTTAATGAGATTTTAAAAGGATATATGTGAGTC  
TACATTCTGATTTTCATGTTTGCATGCATGGTTTTTTTTTTCTTTTGAGACAGAG  
TCTCGCTCTGTGCGCCAGGCTGGAGTGCAGTGGCGTGATCTCGGCTCACT  
GCAAGCTTTGCCTCCTGGGTTACACAATGTAATAGTGTTTTATTATTGTTTC  
CATTTTTATTGAAGAAGTAAGATTGTCCCTAGCAGATGGAGACACTGAGATA  
TGGGACAGAAGTTTTGTTCTATATAATTATTATGCGCTTCCACCTTTCTTAGC  
ATAGACAGTTTCCAAAATGCAACTTCAAGTTACCCCTTTATAAGCATAATAAC  
AATAATACCCAACATATATGTAATGCTCTTTATGTGCCAAGTACTATACTAAC  
ACATGCACATTACATACACACACACCACATACACACACATATTTAACTAATT  
TCGTTCTCACAATGACATTTTGTAGGCAAGTATTATTATTGTACAGATGAGAAA  
ACCAAGGCACGCTTATCTGTAAACCTCTGCTATGCAGAAATTCTGGAGGG  
GCTTCTGGCCCCTTAATTTTAAAATAAGGCCAATAACAATACTTACCACAT  
AGCAATTCTCTAAACATTATGTAAGATATATACCAAAGCGCTTAGCTCAGGG  
ACTGGAGGGATGTGAGGGAATTTGTCTTTTGTCAATATGCTTTATGGTCCGCT  
CAGTCACCTCGTTCTTAATCCCTTTCTCAACTTCTATTTTATACAGAAATTGT  
GAGCATATCAGCATTAAAGTACCCTGAGGTGGCAATGCACACTTCAACTTCT  
TCTTCAGTCACAAAGAGTTACATCTCATCACAGACAAATGGTTTGTTCATT  
TTTATTTTTAAATTGTGGCTCCGAAATCATTTTTGTGATGTAACCCATTTTAGG  
GGACCTGTCACTGCAGAGAACTGACAAACACTGAGAAATGCGAGCTAAGT  
AGACACAGCCTACTAAGTAGACACAATTCCTACTATGGAGGAATTCTTGCT  
CTGAAATATCTCACAGAAATAACTGTGAGTTAAAGAAATTAACAATGTG  
GCAAAGCACAGAAATGATGCACGTGACCATGAAATAGTGGGCCAGATAAAG  
GGGACCTAATAGTGCGGTGGTGCAGGAGGTCTGTGGGCAAACCTGAGTTCA  
GCTCAGACCCGGGCTCAGCTCTATGCCAGCTGCTGACCCAGGGTGAGTTG  
CCCTGCAGGGTTTCTATCCCATTAATTTTAAAATGGGGCCAATAACACAGTA  
CTTATCTCACAGCATTCTCTAAAGGCTAAATAAGAAGATGTATCTAAAAGTT  
ATTAGCTCAGAGCCTCACACATTCTCAGTGACTGATAACAATAAGCAAAGC  
TGGGTGCTGAGATAAGAGTAATCTGGTGGCAGTCTCTCTTGTAGTTTTTCAG  
GGGAGAAGAAGAAATTCTGGAGCCGCTGCTGGGAGGGATGTGGGAGAGTT  
TGTCTTTCATAATACGCTCTATGTCCACGCAGTCACCTCATTCTTGTGCCCTT  
TCTCAACTTCTTTATATGCAGATACGCACAAACGGGACACATATGCAGCCA  
CTCCTAGAGCTCATGAAGTTTCAGAAATTTCTGTTAGAAGTGTACCCTCCA  
GAAGAGGAAACCGGTATGTTCTTAGTTTTAAATAGTTGCTCTGGAGTCATTG  
TTGTGATTGAACTCTATTTACACGAGCTGTAACCTCATGACAGTTCTCAAGCTT  
TCGTGACAGAAAACCCATCTCTTTTACTCAAAGCCCATATAGCACCCACAA  
CTATTAAGTGTGACCAAGAAAGAGAAGGCAAGCCCCAATTAACCTTTGTACG  
TAAAGCCTAAAGAATGAAAAATATACCTGAATCCTCAATCATCAAACAGCAT  
AGTATACTAAGTAATTTGTAATAATTAACCTCTAGAAAATTGTGTGGCTTC

GGTAGTAAGAGAGCTTCATGATGTAAAATGGCAAGTGGAGACAGAGACAAA  
AGTAGGATGTGGACTGAGAGGGAAGGTTAGCACAGGTGGAACAGTAAGGC  
AACCATACTATCAATTGCTGCTGACATAGAATCCAGAGAGACTATTGGCAA  
AGCTCAAATGAGACACAGTAACAGTTTAGATTTCAGACAGTGGCTGTGGCATA  
AATCAGAAAATTGATAGTCGCATGATCCCTCTTTGCATGGGACTGGCATCTG  
TGTGGAGTAATGGTTCCATATGCCTCCTTTCTTCTCCTTATTTTTAAATTTTT  
AAAAATGCATTGCTTCTTGTGGAAGTCAATAAGTGATTCTTCCAATACTTTCT  
CATTCTTCCCCCTCAGTTATGAGACAATTTGCTTATTTCTCATCCATGAATA  
CTTGTTGGGTCAATAAAGTAGATACTGAAATTACTAATGGTACGACTGACA  
TATTACCTCATAAATGTTACTAGCTAGATGTTGAAAGTTGACCAACAACCTCTC  
AAAATATGATTAAGAAAAGGAAACCCACAGAACAGTTTGATTCCAAAATGATT  
TTTTCTTTGCACATGCCTTACTTATTTGGACTTACATTGAAATTTTGCTTTAT  
AGGAGAAAGGGTACAACCTTGCCCATCATTCTCTGAACCAGGTATGTTAATA  
TTTGACAAAGAATAAAAAGTCATTCCATTTTAAACTATCCATTGCTTGTTTCAA  
TGCCTAAGAAAATGTGTCTATCTTAGAAGAGCATATGTTGTTAACTTTATTCA  
CACAAAATTGTAAAGGCAAAGAAAATATTCTCTTTTTAAATTAATAAGGCA  
TTTCTTATTTTTAAAACATTTTGGGGGCCAGGGGCCGTGGCTCATGCCTAT  
AATCCCAGAACTTTGGGAGGCTGAGCCTGGCTAATCGCTTGAGCCCAGGAA  
TTTGAGAACAGCCTGGGCAATATGGCGAAATCCATCTCTACAAAAAATACAA  
AAATTAGCTGGCATGGGGCACGCACCTGTAGTCTCAGCTACTTGGGAGGCT  
GGCTGAGGTGGGAGGATCGGATCCATTGCCTGAGTCTGGGAGTTTAAGGC  
TGCAGTGAGCTATGACTGTGCCACTGTACTCTAGCCTTGGTAAGACCCTGT  
CTCAAAAACAAATACATAAGTAAATAAAAATAAATAAAAACATTTTGAAATA  
GAAATACATAATTTGGTAATAGTTTTCTCTTAAGTTAGATGTTTTACCTTTCT  
AACCAAGCCTGAGTACTTGAAAAAGCCTCATAAGAGCTTATAAAACAAATG  
AATTCCCTCATATAAAAAGCAAGGCATTTAAAATCATCTAATTAAGTGGTAC  
TGTATTTCAAGGGTAAATCTCAGCCTTGATTCATTTTTGGCCCAATGCAACCA  
CTTAGGGACCATCTTGACAACCTCTGCTGAAGGGACATCCCTTCCCCTCACT  
TGAGTATCACTGTGTGTGCTCATTTGCTATTCTGCATTCCAACCCTCCCTTCA  
CACTTGGCTGTGTCCACGGCTCACAGGGTAAAAGCACATCATAGAACTTC  
ATCACTATCGCATAATTCAAGCTAAGTGGTCAAGAAGGCTGGGCAACACC  
AGCAAGAGGAAATGCTACTTTTACTTTTTATCAACAATAGGGCTTTTAAATAT  
TAATTAGGCAAATAAATGAGCCATTTTACCTTTATGTCTAGCCTTCCATTCTA  
TTTACTTCAACTGGAAGCACTACAAATATGCTATAAATATGGAAATATCTCTT  
AATTGATTTCAATTGTTTCATTCCCAACATATAAATGACTCAACAAGCATTTT  
AGTGACTACATTGGAGACTATGCATAAGAATACTATGGAAGGAATAAAGCTT  
AGAACATAGATGACCTGCATTATAATTATAATTCTACTTTTAACTAGTTGTCT  
GACCAAGGCTAAGTTAACCTTATTCAGCTTCTTTTCTTCATTTGTAACCTGTT  
TATACCAGTTTCTTTCCAAAATTATGATTCTATGATCTGTTCAATGCTCTTTTA  
TACATTAAGACATTATTTTCTCTCATAACTTCCAACTATGGGAGAATTTGTG  
GTTTTTCCCACATATCTGAGGAGAACGTCCACTGAGTTCTTATCTACAGTTAC  
ACTAGTGAAGAACGCTGGGTCTGGAATCAGAAGCTTCAGGTCTTAGTTCTG  
TCATCAACTATTTTGCACCTTGGACAAAAGACTTGATCACTCACAGTCCCA  
GTTTCCCACAAGGTTACTGTAAAGCACACAATTTAAAAAAGACAAAATCTAC  
ATAATAGTATATTAATTGTGCTTTCTATTAAGGCAAGGTGATGGTATGCTG  
ATGTTATCTGTCTTATTTTTCAGTTGCTATATGGTCATTTATTTTCAGACTTTCA

TAATTTTGCTGCTCTCTTTATCTCCTGTAGAGATAACACTCATTATTTTTGGG  
GTGATGGCTGGTGTATTGGAACGATCCTCTTAATTTCTTACGGTATTGCGC  
GACTGATAAAGGTGAGAATTCAGTTTTTAATTTTGCTGTAATACCAATGTGA  
ACAGCTCTAAGAGGGTTTATTCTCTGAGTTCAGTTAAACTCAAAGAGAAA  
CAGAACTGCATAAAATTCCATATTTTTCAACTGGACACATAGAAGTCACTGT  
GTTTCTCTAGCAGAATTTTTCTTTGCATTTGCCCAATTAAGGGAACCTCTAA  
ATATAAATCTGTCCCCCATTTTTCCCAATGAAAGATCTCCCTAAGTTTTGTCT  
AACTTGCTGTCACATATTTTGATGGATATTGAGGAAATATTAAGATTCTACTT  
ATAGTATTTACCCTATTAGTGTATAAAATATTTAAAATAATATATTTACATATG  
TTTAAACTTTGAGGGAAGCCAAGGCAGGAGGATTGCTTGAGCTCAGGAGT  
TTGAGACCAGCCTGAGCAAAAAGGTGAAACCTAGTCTATACAAAAAATATGA  
AATTAGAAAGGCGTGGTGGTGCACATGTGTAGTATCAGCTACTCAGGGGG  
CTGAAGTGGGAGGATTGCTTGAGCCTGGGAAATCAAGGCTGCAGTGAGCT  
GTGATCATGCTACTGCACTCCAGCCTGGGCAACAGAGTGAGACCCTGTCTC  
AATAATTATATAAATAAATAAATAAAAAATAAACAAAATAAAACTTTTTGCCTTC  
TTAATTCTCACATATTCTGAAACAGATTTTTCAAATTTCCACCCATGAATTCTT  
AACATCAGTGATTTTTTTTTGAATCATTAAATGCTTTTTTTAATTTTTTTTTTTTT  
TTGAGACAAGAGTTTCCCTCTGTCACCCAGGCTCGAGTGCAAAGTGGTGCA  
ATCTCTGCTCACTGCAGCCTCTGCCTCCCTGGTTAAGTGATTCTCGTGCTT  
CAGCCTCCGCAGTAGTTGGGACTACAGGTGCGGGACACCATGCCTGACTA  
ATTTTTGTATTTTTTTAATAGCAGAGATGGGGTTTCGCTGTGTTGGCCAGGC  
TGGTTTCAAACCTCCTGACCTCAAGTGATCCATCTGCCCTTGGCCTCCAAAGT  
GCTGGGATTACAAGCATGAGCCACCACGCCAGCCACTAATGCTATTTTT  
ACATCCATACAACACAGCTTATCGAAGTGATAACTTTTTGCTATCACTTTCTA  
TTCACGATATTTAAGACATAATATGTGTGTGTGATTTATGATGCTGTCAGT  
TCTCTGTAATCCTAGATCAGAAGTACTTAGTCACATGAGATTGGTACAGTTG  
TGTTTTCATTCATCCTCTATTCTTAATCTCTCTTTGTGATTTTTGAGACCATAA  
CCACTATATAATTCTTTTAAAAGGCTGAGAGGTGTGACAGCACTGCAATTG  
TGGGGCCATCAGAAGATATGATAGTAATATCTACATTAAGTTCCTTTGCCTCT  
TTTCTTTTTTAACACTTCTAACAGTAACTTCTACCATCATCCAATCCTATAA  
TTGATTTTCAGTATTCCATGTAAATATATCTTCCCTTAAATAACTTTTTGTTAA  
TCAAAGAAAAGTAACTGAAAATGCCTACTCTTGTGTGAGATATTTGTAAGG  
ACTTTAATATAAGATAGCTTTTTTTGCCTGGAGTATAAAAAGAGAAAAGTCATC  
TTCTTACATGGGCATATATGGCAAAGTGGGTTGTCTTCTCTCTTCGTCAATG  
TTCTAAAACCTGAAAAAGCCAAGGAAATATTTAGTTGGCAAAGTTCAGAGAA  
TTTTCTAAGTGTATATGGATGAATTTTGTCCCTGGTCAACATGATGCAGAGATC  
ACACACTTTATTTTTATTTTTATTTTCACTTTCACTATTTATTACAGCAGGGAA  
ATATGTAAGTATCAGTGTGTTGAGGTGATATTTCTCCTACTGAAATACCAAATA  
CTATAGAGGAACACAAATACAAGTTTAAATCAATGCTTATACCAGTAACTAGT  
AACAAACAATAACAAAATCTCTGCAAAGGGGATTTCAACCAAAGAAAAA  
AAATTTTAGAAAAAATATTTTTAAGCTGAAGCATTTTACTTTTTACTGTCTTA  
AGACTAGAAAATTGTGTTATTAATATTTTATGGTATTTCTTCATAGAAAAGCC  
CATCTGATGTAAAACCTCTCCCCTCACCTGACACAGACGTGCCTTTAAGTTC  
TGTTGAAATAGAAAATCCAGGTTGGTGTAAATATTTGCAGTTCCTTTTGCCTT  
TTAGGAAAAAAAATCAAACCAGTGAGTTACTTCTTTCTGATTTGAGGGAGG  
AGGGAACCAGTTATGATTCATTTCTATTCTATCTCATTAAATTCTACTTCTTTGA

CTTTTTAGAAATGTCTGCAGCATAGTGAGATTCTCCTTTGGACACAAAGTGTT  
TTGTTTTGTTTTGTTTTTTAACAAAAAATACTCAATCAAATAGTAAAA  
GCAAAGAGAAAACCAAGTGTACTTCGTATTTCCCAAAGTCAAAGTTATGT  
GTATAGGAGACTCTATGGTCAGTATGGTGTAGCATAGTGAATTAGCCCCAG  
ATCTGAAATCAGACTTGGATTTGAATCCATGCTCCAACACCTATTAGCTGTG  
TAACCCTGAGCAAGCTACTAAACCTCTTTAATATGGGGATAATGATAGTAT  
CAACCTCACAAAGTTTAATGAGAATTAATGAGCTACAACCGGTAAAGCATT  
TAAAACCATTTGTGGCCATCATAAGTCCTCATGCCTGTTAGCTGTTATCAATA  
TAGCACTGACATCAATGCTATATCAATATAGCATGTTATCAATATAGTGCAT  
TCCCAAATGACCTCCTGTGCACACTGGCAAGCCATCTGGCACATGCTTTCAT  
CTCCACTCCCAGGTGCTAAGCAGATACAAAACATGTGAAAGGCCATGGATA  
TATTTTGTATCCAGAACAGTATTAACCACATAGTGCTTTTTGAAAAGAAT  
ATTTATTGTCAACCTTTAAAAGTCGGAAATTGTTACATTTTAAAATCAAGTAT  
TGCTATTCCTCTGGGGAAAAATGTAACCTCCCAAATGCTGAGAGCCTTCAT  
ACCAGCATGAGACCAATTCCTAAGAGCTGAGTAGTGGCTGCTACCTGTACT  
GTCTGTCTAAATCCCTAGCCAATTGCATTTGTTTTATTACCGTGGCCCCCTG  
GTATGAACTCACTAAGAAAGCATATAGTTTCTATTAACCTTTGCCTGAAGCAT  
AAACCCAAATGACATCTATTTTGGGAGATAGTTACTAAGAACAAGTCTCTGG  
AATGAGCTTTATTTCTCAAGCAAAGAGATTTCAATTCTGCCTTCTACAAAATC  
AACTGATTTTACTCCCATAATTTTCAGAAATCATGACAGATCAGAGGTCTGT  
ATGCTTCTGGATTTGATTTTAAACCCTGGGCCAGTCTAGGTTTTCTAGACTTT  
AGAGTCACAGAACACAGAGTTTTCAAGATCCATCACAGCTACACAGGTTATA  
TGCAGGATTTGCCACATCACATTATCATGTGAATTCTTAAAGCTTAAAGAGTAA  
TTGTTACATAAGTTTATAATCCTAAGACATTCCTGCTATGTGGAAATGAATGG  
CATAGATATGATTCTCAGCTAAAAGGATTAATAAATCCAATCTGCAGATACT  
TGAAACAACGGAAGTTTTTGAGTCATATGCCAGATTCACCTCATTACTAAG  
GTTATCTTGTTATTGGACTGGCAGCTGGAACAAGTATCTGTAAAATATTCATT  
TTATCTGCATTCTGCCTTGTTCCACAAAAAGTCTTGATGTAGTTTTTCAAGT  
GGAGCAATTACAACCTAAAGCCTATTTTTCGAACTGAAATTTATATACATTTT  
TAGCTACTTATTTATTCTAGAGACAAATTTATTGTTTAGAGTTTCCCCTGCCA  
TTTTTTTCATACAATTTAAGCATCTCAAATGTTTGGCACAATTTAATACGCCA  
CAGTGCATCAAGATGTCCTTGTAGTTAATTCAGTTAAGTGCAACAAACATTT  
GCTAAATGCATACAGTGGGGTAGGCACCACACTCACATTAGATATACCAATA  
TGAGTCTTCGTCTTTAGAAGCTGAGAGACTAATGGAAAAACAGAATGTCA  
TTGCAGTGAACAAGTTCTACAGTAGTGGAGGCAATAGCTCCACTTGTCCCA  
GAGACTGAGACAGGTATCAAAGGCTTCTGAAGATGAAATCACCTGGGATTA  
GCCTTAAAAGACAGATAGATATTAGCTAGGGCAGGGTAGTTTTAGCAGAAG  
GGCAGCCTGAGTGAGTAAAAGCATGGAAGACAGAATATGTTTACTTAAAGAA  
TTGTATGCATTTCCACATTAGCAGGATTGCTGCTTTGGTTCTCTGTTACATC  
TCAAATATGTGTAATGGCAGTGGAAAGTCAGAAGAACCAAACCTTTAGGCTCA  
CTTTATTTCCCCACATTTGTGCAAGTGAAGTTATTAATGTCTTAGTATGTTA  
GTGAGACAAGTTATGAATTCTGACTGCACCTCACAGAAAACATAGGAAAACA  
CATTATTAAGATTATTTAAAATGCTTTATTTCTACTTTTATAGAATATGGCTC  
TAAATTAGTTTATAAGCCAAAGGCATAAGAGGTTAAAATGACAGTACCATCT  
CAACAAGAACTAATGATGTAAAGGAGTAATTAGAGTATAAATTGTTTTAACCT  
TCTAAAAGTGACATGATCTGTGATTGGTGAATAAGCGAATCT

GAGTCAGCTGGCCACTGTGGCATGCATATGTGACCCACTAGCCTATTTCCC  
ACAGGAGAATGTTTGAGATGCACAGTTCCTGTGGTGCCCAAATAGAAGAAG  
GCTGGAAAAGCTCTGCTTCTGGAAGAGCAAGGGCTCCCCTCTCCCTTTTCAT  
GCAGTTTCTAGGAGCAACATAAATTCAACCTTCCAACCAGGAAAAGTGGAG  
CATCGGGTTTACTGGAGAAAAGTCCAGTGCCTTCTTTTACACCCTAGA  
ACCAGAGAGGAACTTGGCCATAAGCTTTTGTGCAGACTTCTCCTTGGGGGA  
AAAAAAAAGTCATTATTTAAAAAGACATGACAGACTTAGACACATGCCTTAAA  
TTTTAACATGCATATGTGATTCAACTTATCATTACTGGCTTCACATTATATTT  
TGCCTCTATACAAGTTTGGCTGTTTGTCTTATCTCTGTAGAACTAGGAGC  
AGAGCAATTATATTTATTCTTTACCTAAGGCTTTTAGAATAGATATTCTAAGAA  
ATTCTGTATTTTTCTTTACACAAAAGTTCACAATAGAGCTAATATGTAAGGAG  
AGTCCTTTCGTTTCCACTAATTACATTCAAGAACAAGTCTGCAAGAATGTAG  
AATCCTAAAATGTATACTGTGCATTAATTTCTGTTGTGTTTAAACATAACTAT  
GTCTCATATTTTCGGTCTTGTATTTTTTTTACTATAATCCTTCTAGAGACAAGTG  
ATCAATGAGAATCTGTTCCACCAACCAAAATGTGGAAAGAACACAAAGAAGAC  
ATAAGACTTCAGTCAAGTGAAAAATTAACATGTGGACTGGACACTCCAATAA  
ATTATATACCTGCCTAAGTTGTACAATTTTCAAGATGCAATTTTTCATTATAATGA  
GTTCCAGTGAAGTCAATGATGGGGAAAAAATCTCTGCTCATTAAATTTCAA  
GATAAAGAACAATGTTTCTTGAATGCTTGTGTTTGTGTGTTAGCATAATTT  
TTAGAATTGTTTGGAGAATTCTGATCCAAAAGTTTAGTTGAATTCATCTACGTTT  
GTTTAATATTAAGTAACTTAACTATTCTATTGTATTATAATGATGATTCTGTCAAAT  
GAAAGGCTTGAATACCTAGATGAAGTTTGTAGATTTTCTTCTATTGTAAACTT  
TTGAGTCTGGTTTCATTGTTTTAAATAAATTAAGGGGACACTAAAGTCCTATC  
ATTCATTTCTTTCATTGCTGAACAGGCAAGATATAATATTACATGAATGATTA  
CTATATTTTGTTCACACTAATAAAGCTTATGCTCAGAAATGCCATACACACAC  
ACACACACACACACAAACACACACATTTATCATTTAATGCATAAATCAACACA  
AAAGGTTTTCCCATTAAATATGAAATATTACATATATATAAGTGCCATATTTAAA  
ATAATTTGTCTAACAGTAGAACTGTGTGCGGAGCACTCACTGAAGCTTGCATT  
CCTGAAAGAGTATTTTGTGTAAGTAGAGTATCCGGAGAAGGAAAAGAACT  
TACGACCTTTCTTTATAACAGAACTCAACTCTAAATTCAACAAGATGTGCAA  
ACCGGACATGCAGGTGAATATTTTAAAGGTTACTATAAGGTTCTCAATTTAAA  
TTCTTTAATCTGTCCAGTCCCAGTTTCTCTTATTAATAAAAGTGGAAATTGC  
TTTTAAACCATTTAAAGGAAATTTCTAGATATAGAACTAAGGACTGTGACTAT  
ACAGCTGTCACTCATTGTTAGTAAAAGTAAAGCAAAAACAAAAACAAAA  
AAGACCTTCTGTGATACTTTATTTCCGAAGTAAATAAATCTATATGACTTTT  
TATTATTGTGTGATAACCAAGTAAATGTTTTCTATTTTGCATATTTTTCAGGCAT  
GGTAACAGAAATTTACCTTTTAAATAAATTAATAAATCTAAATTTTAACTACTT  
GTATGTTCCGAGAGTGTGTTTGTACTATATTGACTACTTAAATAGAGAATGA  
GACTAAGAAGGGAACATTTCTGTTGATACATGTTTTTTAAAAGTAATTTTAAAG  
AGCATTATTAGGTTAATTAATCCAATTAATGACCCAAATGCCAAGGTAATTTT  
AAATTTACATTTTAAATAAAGCAACATGTTGAAACAAGAGAGGGTGAGATTA  
ACCTTTTTGCTAAAGTAATTTACAAGTCAAAGACAGGAAGAGATCAGAGTGA  
ATGTGCCTTCTTAACCAGAGCTACAGAATTTAGTGAATAATTAAGTACAAAC  
TGCTTTGACCTCCTTGAAGTTCCTCAAGCAATTTCTCTGTACTTCTATATATG  
AATGTCTTAGCCAATTTTCTGCTACTATAACAGAATACGACAGACTGGGTAA  
TTTTAAAAGAAAAGAAATTTATTTTCTTCTAGTTCTGGAGGCTGGGAAGGC

GAAGGGCATGGCACTGACATCTGCCTTGTAAGTACTGATGAGAACCTTCTTACT  
 GCATGATAACAAAGCAGCAAGGCAAGCAAAAGCGTAAGATGAAGAGAGAGG  
 AAATGAAGCCAAACACATCCTTTTCATCAGAAGCCCATTCCCTCTATAAGGCG  
 TTATTACATTTATGAGAATGGAGTCCTCATGACCTAATCGTGACCTTAAAGG  
 CCCCTCCCAACACTGTTACAATGGCAATTAATTTCAACAAAGGTTCCAGAG  
 GTGACATTGAATCAGCAATGAAATTTTCATAGTTAAATTTGGTATTCGTGGG  
 GGAAGAAATGACCATTTCCCTTGTATTTTTATAATTAATCAGCAAAATATTG  
 TAATAAAGAAATCTTTCCTGTGAAGATACCATGACCCCA<sub>n</sub>

**Selected Module Sets:**

**Selected Module Count: 3**

**Ignore Asp Overlap: True**

The results below are zinc finger arrays that can be constructed using CoDA. Note that other methods (including modular assembly and OPEN) can also potentially be used to target the input sequence of interest.”

**Sort By:**

ZFA-unknown-1  
 0 nGCAGGAAGGt 10  
 0 nCGTCCTTCCa 10

| FINGER | HELIX   | TRIPLET             | REFERENCE NUMBER | SOURCE |
|--------|---------|---------------------|------------------|--------|
| F1     | RPHHLDA | <a href="#">AGG</a> | -                | CoDA   |
| F2     | QSAHLKR | <a href="#">GGA</a> | -                | CoDA   |
| F3     | QDVSLVR | <a href="#">GCA</a> | -                | CoDA   |

[ZF DNA Sequence](#)

ZFA-unknown-2  
 4 gGAAGGTGGGc 14  
 4 cCTTCCACCCg 14

| FINGER | HELIX    | TRIPLET             | REFERENCE NUMBER | SOURCE |
|--------|----------|---------------------|------------------|--------|
| F1     | KGDHLRR  | <a href="#">GGG</a> | -                | CoDA   |
| F2     | EAHHLRSR | <a href="#">GGT</a> | -                | CoDA   |
| F3     | QDGNLTR  | <a href="#">GAA</a> | -                | CoDA   |

[ZF DNA Sequence](#)

ZFA-unknown-3  
 17 gGAAGATAACa 27

17 cCTTCTATTGt 27

| FINGER | HELIX   | TRIPLET             | REFERENCE NUMBER | SOURCE |
|--------|---------|---------------------|------------------|--------|
| F1     | GHTALRN | <a href="#">AAC</a> | -                | CoDA   |
| F2     | VRHNLTR | <a href="#">GAT</a> | -                | CoDA   |
| F3     | QRNNLGR | <a href="#">GAA</a> | -                | CoDA   |

[ZF DNA Sequence](#)

Bos taurus (cow) Build 3.1

Blast GAAGATAAC

⊕ ZFA-unknown-4

58 tGCA~~G~~TTGTCt 68

58 aCGTCAACAGa 68

| FINGER | HELIX   | TRIPLET             | REFERENCE NUMBER | SOURCE |
|--------|---------|---------------------|------------------|--------|
| F1     | TKKILTV | <a href="#">GTC</a> | -                | CoDA   |
| F2     | HKSSLTR | <a href="#">GTT</a> | -                | CoDA   |
| F3     | QGNTLTR | <a href="#">GCA</a> | -                | CoDA   |

[ZF DNA Sequence](#)

Bos taurus (cow) Build 3.1

Blast GCAGTTGTC

⊕ ZFA-unknown-5

276 gGAA~~G~~AGGAAa 266

276 cCTTCTCCTTt 266

| FINGER | HELIX   | TRIPLET             | REFERENCE NUMBER | SOURCE |
|--------|---------|---------------------|------------------|--------|
| F1     | QASNLLR | <a href="#">GAA</a> | -                | CoDA   |
| F2     | RQDNLGR | <a href="#">GAG</a> | -                | CoDA   |
| F3     | QRNNLGR | <a href="#">GAA</a> | -                | CoDA   |

[ZF DNA Sequence](#)

Bos taurus (cow) Build 3.1

Blast GAAGAGGAA

⊕ ZFA-unknown-6

282 gGTG~~G~~ATGGA~~T~~t 292

282 cCACCTACCTa 292

| FINGER | HELIX   | TRIPLET             | REFERENCE NUMBER | SOURCE |
|--------|---------|---------------------|------------------|--------|
| F1     | DKTKLRV | <a href="#">GGA</a> | -                | CoDA   |
| F2     | VRHNLTR | <a href="#">GAT</a> | -                | CoDA   |
| F3     | RRAALGP | <a href="#">GTG</a> | -                | CoDA   |

[ZF DNA Sequence](#)

Bos taurus (cow) Build 3.1

Blast GTGGATGGA

+ ZFA-unknown-7  
312 gGTAGCTGAGt 302  
312 cCATCGACTCa 302

| FINGER | HELIX   | TRIPLET             | REFERENCE NUMBER | SOURCE |
|--------|---------|---------------------|------------------|--------|
| F1     | KHSNLTR | <a href="#">GAG</a> | -                | CoDA   |
| F2     | QRSDLTR | <a href="#">GCT</a> | -                | CoDA   |
| F3     | QSGTLTR | <a href="#">GTA</a> | -                | CoDA   |

[ZF DNA Sequence](#)

Bos taurus (cow) Build 3.1

Blast GTAGCTGAG

+ ZFA-unknown-8  
314 aTGTGGGGGAa 324  
314 tACACCCCTt 324

| FINGER | HELIX   | TRIPLET             | REFERENCE NUMBER | SOURCE |
|--------|---------|---------------------|------------------|--------|
| F1     | TSAHLAR | <a href="#">GGA</a> | -                | CoDA   |
| F2     | RREHLVR | <a href="#">GGG</a> | -                | CoDA   |
| F3     | QRHGLSS | <a href="#">TGT</a> | -                | CoDA   |

[ZF DNA Sequence](#)

Bos taurus (cow) Build 3.1

Blast TGTGGGGGA

+ ZFA-unknown-9  
315 tGTGGGGGAAa 325  
315 aCACCCCTTt 325

| FINGER | HELIX   | TRIPLET             | REFERENCE NUMBER | SOURCE |
|--------|---------|---------------------|------------------|--------|
| F1     | QLSNLTR | <a href="#">GAA</a> | -                | CoDA   |
| F2     | RREHLVR | <a href="#">GGG</a> | -                | CoDA   |
| F3     | RPDALPR | <a href="#">GTG</a> | -                | CoDA   |

[ZF DNA Sequence](#)

Bos taurus (cow) Build 3.1

Blast GTGGGGGAA

+ ZFA-unknown-10  
392 cTAAGCTAGc 402  
392 gATTCAGATCg 402

| FINGER | HELIX | TRIPLET | REFERENCE NUMBER | SOURCE |
|--------|-------|---------|------------------|--------|
|--------|-------|---------|------------------|--------|



|    |         |                     |   |      |
|----|---------|---------------------|---|------|
| F1 | RGTNLRT | <a href="#">TAG</a> | - | CoDA |
| F2 | DHSSLKR | <a href="#">GTC</a> | - | CoDA |
| F3 | QQGNLGL | <a href="#">TAA</a> | - | CoDA |

[ZF DNA Sequence](#)

Blast TAAGTCTAG

Bos taurus (cow) Build 3.1

⊕ ZFA-unknown-11  
 477 aTAA**GGAGAT**t 487  
 477 tATTCCTCTAa 487

| FINGER | HELIX   | TRIPLET             | REFERENCE NUMBER | SOURCE |
|--------|---------|---------------------|------------------|--------|
| F1     | TRQRLRI | <a href="#">GAT</a> | -                | CoDA   |
| F2     | QSAHLKR | <a href="#">GGA</a> | -                | CoDA   |
| F3     | QRGNLNM | <a href="#">TAA</a> | -                | CoDA   |

[ZF DNA Sequence](#)

Blast TAAGGAGAT

Bos taurus (cow) Build 3.1

⊕ ZFA-unknown-12  
 513 cGAA**GATGTT**g 523  
 513 gCTTCTACAAC 523

| FINGER | HELIX   | TRIPLET             | REFERENCE NUMBER | SOURCE |
|--------|---------|---------------------|------------------|--------|
| F1     | TNQALGV | <a href="#">GTT</a> | -                | CoDA   |
| F2     | VRHNLTR | <a href="#">GAT</a> | -                | CoDA   |
| F3     | QRNNLGR | <a href="#">GAA</a> | -                | CoDA   |

[ZF DNA Sequence](#)

Blast GAAGATGTT

Bos taurus (cow) Build 3.1

⊕ ZFA-unknown-13  
 516 aGAT**GTTGGT**a 526  
 516 tCTACAACCA 526

| FINGER | HELIX   | TRIPLET             | REFERENCE NUMBER | SOURCE |
|--------|---------|---------------------|------------------|--------|
| F1     | RRQKLTI | <a href="#">GGT</a> | -                | CoDA   |
| F2     | HKSSLTR | <a href="#">GTT</a> | -                | CoDA   |
| F3     | ISHNLAR | <a href="#">GAT</a> | -                | CoDA   |

[ZF DNA Sequence](#)

Blast GATGTTGGT

Bos taurus (cow) Build 3.1

⊕

ZFA-unknown-14  
610 gTGGGGAGTTg 620  
610 cACCCCTCAAc 620

| FINGER | HELIX   | TRIPLET             | REFERENCE NUMBER | SOURCE |
|--------|---------|---------------------|------------------|--------|
| F1     | TTALLKR | <a href="#">GTT</a> | -                | CoDA   |
| F2     | QSAHLKR | <a href="#">GGA</a> | -                | CoDA   |
| F3     | RSDHLSL | <a href="#">TGG</a> | -                | CoDA   |

Bos taurus (cow) Build 3.1

[ZF DNA Sequence](#)

Blast TGGGGAGTT

⊕ ZFA-unknown-15  
613 gGGAGTTGTTc 623  
613 cCCTCAACAAg 623

| FINGER | HELIX   | TRIPLET             | REFERENCE NUMBER | SOURCE |
|--------|---------|---------------------|------------------|--------|
| F1     | TKPVLKI | <a href="#">GTT</a> | -                | CoDA   |
| F2     | HKSSLTR | <a href="#">GTT</a> | -                | CoDA   |
| F3     | QTTHLSR | <a href="#">GGA</a> | -                | CoDA   |

Bos taurus (cow) Build 3.1

[ZF DNA Sequence](#)

Blast GGAGTTGTT

⊕ ZFA-unknown-16  
629 aGAAGCGAACa 619  
629 tCTTCGCTTgt 619

| FINGER | HELIX   | TRIPLET             | REFERENCE NUMBER | SOURCE |
|--------|---------|---------------------|------------------|--------|
| F1     | GHTALAL | <a href="#">AAC</a> | -                | CoDA   |
| F2     | RTDTLAR | <a href="#">GCG</a> | -                | CoDA   |
| F3     | QTNNLGR | <a href="#">GAA</a> | -                | CoDA   |

Bos taurus (cow) Build 3.1

[ZF DNA Sequence](#)

Blast GAAGCGAAC

⊕ ZFA-unknown-17  
656 aTAGGAAGAAa 666  
656 tATCCTTCTTt 666

| FINGER | HELIX   | TRIPLET             | REFERENCE NUMBER | SOURCE |
|--------|---------|---------------------|------------------|--------|
| F1     | QASNLTR | <a href="#">GAA</a> | -                | CoDA   |
| F2     | QQTNLTR | <a href="#">GAA</a> | -                | CoDA   |
| F3     | RRDHLSL | <a href="#">TAG</a> | -                | CoDA   |

[ZF DNA Sequence](#)

Bos taurus (cow) Build 3.1

Blast TAGGAAGAA

⊕ ZFA-unknown-18  
879 aGAGGATGTTt 869  
879 tCTCCTACAAa 869

| FINGER | HELIX   | TRIPLET             | REFERENCE NUMBER | SOURCE |
|--------|---------|---------------------|------------------|--------|
| F1     | TNQALGV | <a href="#">GTT</a> | -                | CoDA   |
| F2     | VRHNLTR | <a href="#">GAT</a> | -                | CoDA   |
| F3     | REDNLPR | <a href="#">GAG</a> | -                | CoDA   |

[ZF DNA Sequence](#)

Bos taurus (cow) Build 3.1

Blast GAGGATGTT

⊕ ZFA-unknown-19  
923 gTGTGCTGGGc 913  
923 cACACGACCCg 913

| FINGER | HELIX   | TRIPLET             | REFERENCE NUMBER | SOURCE |
|--------|---------|---------------------|------------------|--------|
| F1     | KKDHLHR | <a href="#">GGG</a> | -                | CoDA   |
| F2     | QRSDLTR | <a href="#">GCT</a> | -                | CoDA   |
| F3     | QPHGLRH | <a href="#">TGT</a> | -                | CoDA   |

[ZF DNA Sequence](#)

Bos taurus (cow) Build 3.1

Blast TGTGCTGGG

⊕ ZFA-unknown-20  
932 gGCAGTGTGCTt 942  
932 cCGTCAACGAa 942

| FINGER | HELIX   | TRIPLET             | REFERENCE NUMBER | SOURCE |
|--------|---------|---------------------|------------------|--------|
| F1     | TKQILGR | <a href="#">GCT</a> | -                | CoDA   |
| F2     | HKSSLTR | <a href="#">GTT</a> | -                | CoDA   |
| F3     | QGNTLTR | <a href="#">GCA</a> | -                | CoDA   |

[ZF DNA Sequence](#)

Bos taurus (cow) Build 3.1

Blast GCAGTTGCT

⊕ ZFA-unknown-21  
949 tTCTGAGTCTa 959  
949 aAGACTCAGAt 959

| FINGER | HELIX   | TRIPLET             | REFERENCE NUMBER | SOURCE |
|--------|---------|---------------------|------------------|--------|
| F1     | SKPNLKM | <a href="#">TCT</a> | -                | CoDA   |
| F2     | RQDNLGR | <a href="#">GAG</a> | -                | CoDA   |
| F3     | QRNTLKG | <a href="#">TCT</a> | -                | CoDA   |

[ZF DNA Sequence](#)

Bos taurus (cow) Build 3.1

Blast TCTGAGTCT

⊕ ZFA-unknown-22  
 1026 gGGAGGAGAGa 1036  
 1026 cCCTCCTCTct 1036

| FINGER | HELIX   | TRIPLET             | REFERENCE NUMBER | SOURCE |
|--------|---------|---------------------|------------------|--------|
| F1     | KHSNLTR | <a href="#">GAG</a> | -                | CoDA   |
| F2     | QSAHLKR | <a href="#">GGA</a> | -                | CoDA   |
| F3     | QMSHLKR | <a href="#">GGA</a> | -                | CoDA   |

[ZF DNA Sequence](#)

Bos taurus (cow) Build 3.1

Blast GGAGGAGAG

⊕ ZFA-unknown-23  
 1144 gGCTGGGGAAc 1154  
 1144 cCGACCCCTTg 1154

| FINGER | HELIX   | TRIPLET             | REFERENCE NUMBER | SOURCE |
|--------|---------|---------------------|------------------|--------|
| F1     | QLSNLTR | <a href="#">GAA</a> | -                | CoDA   |
| F2     | RREHLVR | <a href="#">GGG</a> | -                | CoDA   |
| F3     | VSNSLAR | <a href="#">GCT</a> | -                | CoDA   |

[ZF DNA Sequence](#)

Bos taurus (cow) Build 3.1

Blast GCTGGGGAA

⊕ ZFA-unknown-24  
 1197 aGACGAGGACa 1187  
 1197 tCTGCTCCTgt 1187

| FINGER | HELIX   | TRIPLET             | REFERENCE NUMBER | SOURCE |
|--------|---------|---------------------|------------------|--------|
| F1     | DEANLRR | <a href="#">GAC</a> | -                | CoDA   |
| F2     | RQDNLGR | <a href="#">GAG</a> | -                | CoDA   |
| F3     | DPSNLRR | <a href="#">GAC</a> | -                | CoDA   |

[ZF DNA Sequence](#)

Bos taurus (cow) Build 3.1

Blast GACGAGGAC

+ ZFA-unknown-25  
1322 cTGTGATTAGa 1332  
1322 gACACTAATCt 1332

| FINGER | HELIX   | TRIPLET | REFERENCE NUMBER | SOURCE |
|--------|---------|---------|------------------|--------|
| F1     | RSHNLRL | TAG     | -                | CoDA   |
| F2     | VRHNLTR | GAT     | -                | CoDA   |
| F3     | QPHGLAH | TGT     | -                | CoDA   |

[ZF DNA Sequence](#)

Bos taurus (cow) Build 3.1

Blast TGTGATTAG

+ ZFA-unknown-26  
1376 aTAAGCAGTAg 1386  
1376 tATTCGTCATc 1386

| FINGER | HELIX   | TRIPLET | REFERENCE NUMBER | SOURCE |
|--------|---------|---------|------------------|--------|
| F1     | QKQALTR | GTA     | -                | CoDA   |
| F2     | QSTTLKR | GCA     | -                | CoDA   |
| F3     | QGGNLAL | TAA     | -                | CoDA   |

[ZF DNA Sequence](#)

Bos taurus (cow) Build 3.1

Blast TAAGCAGTA

+ ZFA-unknown-27  
1379 aGCAGTAGCTa 1389  
1379 tCGTCATCGAt 1389

| FINGER | HELIX   | TRIPLET | REFERENCE NUMBER | SOURCE |
|--------|---------|---------|------------------|--------|
| F1     | NGQGLRR | GCT     | -                | CoDA   |
| F2     | QRSSLVR | GTA     | -                | CoDA   |
| F3     | QDNTLRR | GCA     | -                | CoDA   |

[ZF DNA Sequence](#)

Bos taurus (cow) Build 3.1

Blast GCAGTAGCT

+ ZFA-unknown-28  
1420 gTAGGTTGTt 1410  
1420 cATCCAACAa 1410

| FINGER | HELIX   | TRIPLET | REFERENCE NUMBER | SOURCE |
|--------|---------|---------|------------------|--------|
| F1     | RRQHLQY | TGT     | -                | CoDA   |
| F2     | HKSSLTR | GTT     | -                | CoDA   |

|    |         |            |   |      |
|----|---------|------------|---|------|
| F3 | RPESLAP | <u>TAG</u> | - | CoDA |
|----|---------|------------|---|------|

[ZF DNA Sequence](#) Bos taurus (cow) Build 3.1

**Blast TAGGTTGT**

⊕ ZFA-unknown-29  
 1507 tTAAGCAGAAa 1517  
 1507 aATTCTGCTTt 1517

| FINGER | HELIX   | TRIPLET    | REFERENCE NUMBER | SOURCE |
|--------|---------|------------|------------------|--------|
| F1     | QGSNLAR | <u>GAA</u> | -                | CoDA   |
| F2     | QSTTLKR | <u>GCA</u> | -                | CoDA   |
| F3     | QGGNLAL | <u>TAA</u> | -                | CoDA   |

[ZF DNA Sequence](#) Bos taurus (cow) Build 3.1

**Blast TAAGCAGAA**

⊕ ZFA-unknown-30  
 1561 gGATGTAGTgt 1571  
 1561 cCTACATCACa 1571

| FINGER | HELIX   | TRIPLET    | REFERENCE NUMBER | SOURCE |
|--------|---------|------------|------------------|--------|
| F1     | RKHILIH | <u>GTG</u> | -                | CoDA   |
| F2     | QRSSLVR | <u>GTA</u> | -                | CoDA   |
| F3     | VGHNLRS | <u>GAT</u> | -                | CoDA   |

[ZF DNA Sequence](#) Bos taurus (cow) Build 3.1

**Blast GATGTAGT**

⊕ ZFA-unknown-31  
 1633 tTGIGTTGCTc 1643  
 1633 aACACAACGAg 1643

| FINGER | HELIX   | TRIPLET    | REFERENCE NUMBER | SOURCE |
|--------|---------|------------|------------------|--------|
| F1     | TKQILGR | <u>GCT</u> | -                | CoDA   |
| F2     | HKSSLTR | <u>GTT</u> | -                | CoDA   |
| F3     | QPGLAH  | <u>TGT</u> | -                | CoDA   |

[ZF DNA Sequence](#) Bos taurus (cow) Build 3.1

**Blast TGTGTTGCT**

⊕ ZFA-unknown-32  
 1646 tGGGGCAACc 1656  
 1646 aCCCCGTTTg 1656

| FINGER | HELIX   | TRIPLET             | REFERENCE NUMBER | SOURCE |
|--------|---------|---------------------|------------------|--------|
| F1     | GHTALRN | <a href="#">AAC</a> | -                | CoDA   |
| F2     | QSTTLKR | <a href="#">GCA</a> | -                | CoDA   |
| F3     | RTEHLAR | <a href="#">GGG</a> | -                | CoDA   |

[ZF DNA Sequence](#)

Bos taurus (cow) Build 3.1

Blast [GGGGCAAAC](#)

⊕ ZFA-unknown-33  
 1700 c[TGGGGTGT](#)g 1710  
 1700 gACCCCCACAc 1710

| FINGER | HELIX   | TRIPLET             | REFERENCE NUMBER | SOURCE |
|--------|---------|---------------------|------------------|--------|
| F1     | RKQHLTL | <a href="#">TGT</a> | -                | CoDA   |
| F2     | RREHLVR | <a href="#">GGG</a> | -                | CoDA   |
| F3     | RMDHLAG | <a href="#">TGG</a> | -                | CoDA   |

[ZF DNA Sequence](#)

Bos taurus (cow) Build 3.1

Blast [TGGGGTGT](#)

⊕ ZFA-unknown-34  
 1701 t[GGGGTGTG](#)c 1711  
 1701 aCCCCACACg 1711

| FINGER | HELIX   | TRIPLET             | REFERENCE NUMBER | SOURCE |
|--------|---------|---------------------|------------------|--------|
| F1     | RRFILSR | <a href="#">GTG</a> | -                | CoDA   |
| F2     | EAHHLR  | <a href="#">GGT</a> | -                | CoDA   |
| F3     | RTEHLAR | <a href="#">GGG</a> | -                | CoDA   |

[ZF DNA Sequence](#)

Bos taurus (cow) Build 3.1

Blast [GGGGTGTG](#)

⊕ ZFA-unknown-35  
 1719 t[TGGGAAAC](#)t 1729  
 1719 aACCCTTTGa 1729

| FINGER | HELIX   | TRIPLET             | REFERENCE NUMBER | SOURCE |
|--------|---------|---------------------|------------------|--------|
| F1     | GASALRQ | <a href="#">AAC</a> | -                | CoDA   |
| F2     | QQTNLTR | <a href="#">GAA</a> | -                | CoDA   |
| F3     | RSDHLSL | <a href="#">TGG</a> | -                | CoDA   |

[ZF DNA Sequence](#)

Bos taurus (cow) Build 3.1

Blast TGGGAAAAC

- ZFA-unknown-36  
1807 aGTTGTAGAAa 1797  
1807 tCAACATCTTt 1797

| FINGER | HELIX   | TRIPLET | REFERENCE NUMBER | SOURCE |
|--------|---------|---------|------------------|--------|
| F1     | HRPNLTR | GAA     | -                | CoDA   |
| F2     | QRSSLVR | GTA     | -                | CoDA   |
| F3     | HHNSLTR | GTT     | -                | CoDA   |

[ZF DNA Sequence](#)

Bos taurus (cow) Build 3.1

Blast GTTGTAGAA

- ZFA-unknown-37  
1810 tGTAGTGTAg 1800  
1810 aCATCAACATc 1800

| FINGER | HELIX   | TRIPLET | REFERENCE NUMBER | SOURCE |
|--------|---------|---------|------------------|--------|
| F1     | QQQALKR | GTA     | -                | CoDA   |
| F2     | HKSSLTR | GTT     | -                | CoDA   |
| F3     | QSTSLQR | GTA     | -                | CoDA   |

[ZF DNA Sequence](#)

Bos taurus (cow) Build 3.1

Blast GTAGTTGTA

- ZFA-unknown-38  
1813 tTGTGTAGTTg 1803  
1813 aACACATCAAc 1803

| FINGER | HELIX   | TRIPLET | REFERENCE NUMBER | SOURCE |
|--------|---------|---------|------------------|--------|
| F1     | TSTRLDI | GTT     | -                | CoDA   |
| F2     | QRSSLVR | GTA     | -                | CoDA   |
| F3     | QPHGLAH | TGT     | -                | CoDA   |

[ZF DNA Sequence](#)

Bos taurus (cow) Build 3.1

Blast TGTGTAGTT

- ZFA-unknown-39  
1819 aTCTGCTGTG 1809  
1819 tAGACGAACAc 1809

| FINGER | HELIX | TRIPLET | REFERENCE NUMBER | SOURCE |
|--------|-------|---------|------------------|--------|
|--------|-------|---------|------------------|--------|



|    |         |                     |   |      |
|----|---------|---------------------|---|------|
| F1 | KRQHLEY | <a href="#">TGT</a> | - | CoDA |
| F2 | QRSDLTR | <a href="#">GCT</a> | - | CoDA |
| F3 | QRNTLKG | <a href="#">TCT</a> | - | CoDA |

[ZF DNA Sequence](#)

Bos taurus (cow) Build 3.1

Blast TCTGCTTGT

- + ZFA-unknown-40  
 1910 aGATGATAACa 1900  
 1910 tCTACTATTGt 1900

| FINGER | HELIX   | TRIPLET             | REFERENCE NUMBER | SOURCE |
|--------|---------|---------------------|------------------|--------|
| F1     | GHTALRN | <a href="#">AAC</a> | -                | CoDA   |
| F2     | VRHNLTR | <a href="#">GAT</a> | -                | CoDA   |
| F3     | ISHNLAR | <a href="#">GAT</a> | -                | CoDA   |

[ZF DNA Sequence](#)

Bos taurus (cow) Build 3.1

Blast GATGATAAC

- + ZFA-unknown-41  
 1945 tGATGTGGCTa 1955  
 1945 aCTACACCGAt 1955

| FINGER | HELIX   | TRIPLET             | REFERENCE NUMBER | SOURCE |
|--------|---------|---------------------|------------------|--------|
| F1     | TKPILVR | <a href="#">GCT</a> | -                | CoDA   |
| F2     | RREVLEN | <a href="#">GTG</a> | -                | CoDA   |
| F3     | ISHNLAR | <a href="#">GAT</a> | -                | CoDA   |

[ZF DNA Sequence](#)

Bos taurus (cow) Build 3.1

Blast GATGTGGCT

- + ZFA-unknown-42  
 2008 aGCTGAAGAGt 2018  
 2008 tCGACTTCTCa 2018

| FINGER | HELIX   | TRIPLET             | REFERENCE NUMBER | SOURCE |
|--------|---------|---------------------|------------------|--------|
| F1     | KHNSLNR | <a href="#">GAG</a> | -                | CoDA   |
| F2     | QQTNLNR | <a href="#">GAA</a> | -                | CoDA   |
| F3     | VGNSLNR | <a href="#">GCT</a> | -                | CoDA   |

[ZF DNA Sequence](#)

Bos taurus (cow) Build 3.1

Blast GCTGAAGAG

+

ZFA-unknown-43  
2024 tGGTGAAGTCt 2034  
2024 aCCTTCAGa 2034

| FINGER | HELIX   | TRIPLET             | REFERENCE NUMBER | SOURCE |
|--------|---------|---------------------|------------------|--------|
| F1     | TSTLLNR | <a href="#">GTC</a> | -                | CoDA   |
| F2     | QQTNLTR | <a href="#">GAA</a> | -                | CoDA   |
| F3     | IRHHLKR | <a href="#">GGT</a> | -                | CoDA   |

[ZF DNA Sequence](#)

Bos taurus (cow) Build 3.1

Blast GGTGAAGTC

⊕ ZFA-unknown-44  
2068 aGATGATTGc 2078  
2068 tCTACTAACGg 2078

| FINGER | HELIX   | TRIPLET             | REFERENCE NUMBER | SOURCE |
|--------|---------|---------------------|------------------|--------|
| F1     | RKRNLIM | <a href="#">TGC</a> | -                | CoDA   |
| F2     | VRHNLTR | <a href="#">GAT</a> | -                | CoDA   |
| F3     | ISHNLAR | <a href="#">GAT</a> | -                | CoDA   |

[ZF DNA Sequence](#)

Bos taurus (cow) Build 3.1

Blast GATGATTGC

⊕ ZFA-unknown-45  
2133 gTAAGTTAGa 2123  
2133 cATTCAAATct 2123

| FINGER | HELIX   | TRIPLET             | REFERENCE NUMBER | SOURCE |
|--------|---------|---------------------|------------------|--------|
| F1     | RSHNLRL | <a href="#">TAG</a> | -                | CoDA   |
| F2     | HKSSLTR | <a href="#">GTT</a> | -                | CoDA   |
| F3     | QQGNLQL | <a href="#">TAA</a> | -                | CoDA   |

[ZF DNA Sequence](#)

Bos taurus (cow) Build 3.1

Blast TAAGTTAG

⊕ ZFA-unknown-46  
2148 gGAAGGAGATc 2138  
2148 cCTTCCTCTAg 2138

| FINGER | HELIX   | TRIPLET             | REFERENCE NUMBER | SOURCE |
|--------|---------|---------------------|------------------|--------|
| F1     | TRQLRI  | <a href="#">GAT</a> | -                | CoDA   |
| F2     | QSAHLKR | <a href="#">GGA</a> | -                | CoDA   |
| F3     | LGENLRR | <a href="#">GAA</a> | -                | CoDA   |

[ZF DNA Sequence](#)

Bos taurus (cow) Build 3.1

Blast GAAGGAGAT

⊕ ZFA-unknown-47  
2265 tGCTGTGGCt 2255  
2265 aCGACACCCGa 2255

| FINGER | HELIX   | TRIPLET             | REFERENCE NUMBER | SOURCE |
|--------|---------|---------------------|------------------|--------|
| F1     | SPSKLVR | <a href="#">GGC</a> | -                | CoDA   |
| F2     | RREVLEN | <a href="#">GTG</a> | -                | CoDA   |
| F3     | VGASLKR | <a href="#">GCT</a> | -                | CoDA   |

[ZF DNA Sequence](#)

Bos taurus (cow) Build 3.1

Blast GCTGTGGC

⊕ ZFA-unknown-48  
2298 gGAGGGTAGGc 2308  
2298 cTCCCATCCg 2308

| FINGER | HELIX   | TRIPLET             | REFERENCE NUMBER | SOURCE |
|--------|---------|---------------------|------------------|--------|
| F1     | RRAHLLS | <a href="#">AGG</a> | -                | CoDA   |
| F2     | EAHHLR  | <a href="#">GGT</a> | -                | CoDA   |
| F3     | RGDNLKR | <a href="#">GAG</a> | -                | CoDA   |

[ZF DNA Sequence](#)

Bos taurus (cow) Build 3.1

Blast GAGGGTAGG

⊕ ZFA-unknown-49  
2302 gGTAGGCGCAg 2312  
2302 cCATCCGCGTc 2312

| FINGER | HELIX   | TRIPLET             | REFERENCE NUMBER | SOURCE |
|--------|---------|---------------------|------------------|--------|
| F1     | RRQELHR | <a href="#">GCA</a> | -                | CoDA   |
| F2     | LKEHLTR | <a href="#">GGC</a> | -                | CoDA   |
| F3     | QTQSLQR | <a href="#">GTA</a> | -                | CoDA   |

[ZF DNA Sequence](#)

Bos taurus (cow) Build 3.1

Blast GTAGGCGCA

⊕ ZFA-unknown-50  
2305 aGGCGAGTGg 2315  
2305 tCCGCGTCACc 2315

| FINGER | HELIX   | TRIPLET             | REFERENCE NUMBER | SOURCE |
|--------|---------|---------------------|------------------|--------|
| F1     | RSHILTN | <a href="#">GTG</a> | -                | CoDA   |
| F2     | QSTTLKR | <a href="#">GCA</a> | -                | CoDA   |
| F3     | DGGHLTR | <a href="#">GGC</a> | -                | CoDA   |

Bos taurus (cow) Build 3.1

[ZF DNA Sequence](#)

Blast [GGCGCAGTG](#)

⊕ ZFA-unknown-51  
 2311 a[GTGGATGAT](#)g 2321  
 2311 tCACCTACTAc 2321

| FINGER | HELIX   | TRIPLET             | REFERENCE NUMBER | SOURCE |
|--------|---------|---------------------|------------------|--------|
| F1     | TKQRLVV | <a href="#">GAT</a> | -                | CoDA   |
| F2     | VRHNLTR | <a href="#">GAT</a> | -                | CoDA   |
| F3     | RRAALGP | <a href="#">GTG</a> | -                | CoDA   |

Bos taurus (cow) Build 3.1

[ZF DNA Sequence](#)

Blast [GTGGATGAT](#)

⊕ ZFA-unknown-52  
 2314 g[GATGATGGG](#)a 2324  
 2314 cCTACTACCct 2324

| FINGER | HELIX   | TRIPLET             | REFERENCE NUMBER | SOURCE |
|--------|---------|---------------------|------------------|--------|
| F1     | KKDHLHR | <a href="#">GGG</a> | -                | CoDA   |
| F2     | VRHNLTR | <a href="#">GAT</a> | -                | CoDA   |
| F3     | ISHNLAR | <a href="#">GAT</a> | -                | CoDA   |

Bos taurus (cow) Build 3.1

[ZF DNA Sequence](#)

Blast [GATGATGGG](#)

⊕ ZFA-unknown-53  
 2319 a[TGGGAGGGA](#)a 2329  
 2319 tACCCTCCCTt 2329

| FINGER | HELIX   | TRIPLET             | REFERENCE NUMBER | SOURCE |
|--------|---------|---------------------|------------------|--------|
| F1     | THAHLTR | <a href="#">GGA</a> | -                | CoDA   |
| F2     | RQDNLGR | <a href="#">GAG</a> | -                | CoDA   |
| F3     | RMDHLAG | <a href="#">TGG</a> | -                | CoDA   |

Bos taurus (cow) Build 3.1

[ZF DNA Sequence](#)

Blast [TGGGAGGGA](#)

+ ZFA-unknown-54  
 2321 gGGAGGGAACg 2331  
 2321 cCCTCCCTGc 2331

| FINGER | HELIX   | TRIPLET             | REFERENCE NUMBER | SOURCE |
|--------|---------|---------------------|------------------|--------|
| F1     | HRTNLIA | <a href="#">AAC</a> | -                | CoDA   |
| F2     | RREHLVR | <a href="#">GGG</a> | -                | CoDA   |
| F3     | QTTHLRR | <a href="#">GGA</a> | -                | CoDA   |

[ZF DNA Sequence](#)

Bos taurus (cow) Build 3.1

Blast [GGAGGGAAC](#)

+ ZFA-unknown-55  
 2322 gGAGGGAACGc 2332  
 2322 cCTCCCTTGCg 2332

| FINGER | HELIX   | TRIPLET             | REFERENCE NUMBER | SOURCE |
|--------|---------|---------------------|------------------|--------|
| F1     | KRIDLQR | <a href="#">ACG</a> | -                | CoDA   |
| F2     | QSAHLKR | <a href="#">GGA</a> | -                | CoDA   |
| F3     | VHWNLMR | <a href="#">GAG</a> | -                | CoDA   |

[ZF DNA Sequence](#)

Bos taurus (cow) Build 3.1

Blast [GAGGGAACG](#)

+ ZFA-unknown-56  
 2355 aGTTGTTGTTc 2345  
 2355 tCAACAACAAg 2345

| FINGER | HELIX   | TRIPLET             | REFERENCE NUMBER | SOURCE |
|--------|---------|---------------------|------------------|--------|
| F1     | TKPVLKI | <a href="#">GTT</a> | -                | CoDA   |
| F2     | HKSSLTR | <a href="#">GTT</a> | -                | CoDA   |
| F3     | IRTSLKR | <a href="#">GTT</a> | -                | CoDA   |

[ZF DNA Sequence](#)

Bos taurus (cow) Build 3.1

Blast [GTTGTTGTT](#)

+ ZFA-unknown-57  
 2412 gTAAGATGATa 2422  
 2412 cATTCTACTAt 2422

| FINGER | HELIX   | TRIPLET             | REFERENCE NUMBER | SOURCE |
|--------|---------|---------------------|------------------|--------|
| F1     | TKQRLVV | <a href="#">GAT</a> | -                | CoDA   |
| F2     | VRHNLTR | <a href="#">GAT</a> | -                | CoDA   |

|    |         |            |   |      |
|----|---------|------------|---|------|
| F3 | QQGNLQL | <u>TAA</u> | - | CoDA |
|----|---------|------------|---|------|

[ZF DNA Sequence](#)

⊕ ZFA-unknown-58  
 2447 tTAAGCAGCTt 2437  
 2447 aATTCGTCGAa 2437

| FINGER | HELIX   | TRIPLET    | REFERENCE NUMBER | SOURCE |
|--------|---------|------------|------------------|--------|
| F1     | TKQILGR | <u>GCT</u> | -                | CoDA   |
| F2     | QSTTLKR | <u>GCA</u> | -                | CoDA   |
| F3     | QQGNLAL | <u>TAA</u> | -                | CoDA   |

[ZF DNA Sequence](#)

⊕ ZFA-unknown-59  
 2454 gGTAGCAGGGa 2464  
 2454 cCATCGTCCct 2464

| FINGER | HELIX   | TRIPLET    | REFERENCE NUMBER | SOURCE |
|--------|---------|------------|------------------|--------|
| F1     | RRAHLQN | <u>GGG</u> | -                | CoDA   |
| F2     | QSTTLKR | <u>GCA</u> | -                | CoDA   |
| F3     | QKVSLKR | <u>GTA</u> | -                | CoDA   |

[ZF DNA Sequence](#)

⊕ ZFA-unknown-60  
 2476 aGTAGATGACa 2486  
 2476 tCATCTACTGt 2486

| FINGER | HELIX   | TRIPLET    | REFERENCE NUMBER | SOURCE |
|--------|---------|------------|------------------|--------|
| F1     | EEVNLRR | <u>GAC</u> | -                | CoDA   |
| F2     | VRHNLTR | <u>GAT</u> | -                | CoDA   |
| F3     | QSTSLQR | <u>GTA</u> | -                | CoDA   |

[ZF DNA Sequence](#)

⊕ ZFA-unknown-61  
 2507 aGGAGCAGGAa 2517  
 2507 tCCTCTGCCTc 2517

| FINGER | HELIX   | TRIPLET             | REFERENCE NUMBER | SOURCE |
|--------|---------|---------------------|------------------|--------|
| F1     | RPAKLVL | <a href="#">GGA</a> | -                | CoDA   |
| F2     | DRGNLTR | <a href="#">GAC</a> | -                | CoDA   |
| F3     | QGGHLKR | <a href="#">GGA</a> | -                | CoDA   |

[ZF DNA Sequence](#)

Blast [GGAGACGGA](#)

Bos taurus (cow) Build 3.1

⊕ ZFA-unknown-62  
 2510 a[GACGGAGCC](#)a 2520  
 2510 tCTGCCTCGGt 2520

| FINGER | HELIX   | TRIPLET             | REFERENCE NUMBER | SOURCE |
|--------|---------|---------------------|------------------|--------|
| F1     | DSPTLRR | <a href="#">GCC</a> | -                | CoDA   |
| F2     | QSAHLKR | <a href="#">GGA</a> | -                | CoDA   |
| F3     | DPSNLRR | <a href="#">GAC</a> | -                | CoDA   |

[ZF DNA Sequence](#)

Blast [GACGGAGCC](#)

Bos taurus (cow) Build 3.1

⊕ ZFA-unknown-63  
 2552 g[GCAGAGGGA](#)a 2562  
 2552 cCGTCTCCCTt 2562

| FINGER | HELIX   | TRIPLET             | REFERENCE NUMBER | SOURCE |
|--------|---------|---------------------|------------------|--------|
| F1     | THAHLTR | <a href="#">GGA</a> | -                | CoDA   |
| F2     | RQDNLGR | <a href="#">GAG</a> | -                | CoDA   |
| F3     | QSNVLSR | <a href="#">GCA</a> | -                | CoDA   |

[ZF DNA Sequence](#)

Blast [GCAGAGGGA](#)

Bos taurus (cow) Build 3.1

⊕ ZFA-unknown-64  
 2615 a[GCTGGAGCT](#)t 2625  
 2615 tCGACCTCGAa 2625

| FINGER | HELIX   | TRIPLET             | REFERENCE NUMBER | SOURCE |
|--------|---------|---------------------|------------------|--------|
| F1     | TTQALRR | <a href="#">GCT</a> | -                | CoDA   |
| F2     | QSAHLKR | <a href="#">GGA</a> | -                | CoDA   |
| F3     | LKHDLRR | <a href="#">GCT</a> | -                | CoDA   |

[ZF DNA Sequence](#)

Bos taurus (cow) Build 3.1

Blast GCTGGAGCT

+ ZFA-unknown-65  
2691 aGTCGAAAGTGa 2681  
2691 tCAGCTTCACT 2681

| FINGER | HELIX   | TRIPLET             | REFERENCE NUMBER | SOURCE |
|--------|---------|---------------------|------------------|--------|
| F1     | RTSSLKR | <a href="#">GTG</a> | -                | CoDA   |
| F2     | QQTNLTR | <a href="#">GAA</a> | -                | CoDA   |
| F3     | DATQLVR | <a href="#">GTC</a> | -                | CoDA   |

[ZF DNA Sequence](#)

Bos taurus (cow) Build 3.1

Blast GTCGAAGTG

+ ZFA-unknown-66  
2744 tTAAGTAAACa 2734  
2744 aATTCATTGT 2734

| FINGER | HELIX   | TRIPLET             | REFERENCE NUMBER | SOURCE |
|--------|---------|---------------------|------------------|--------|
| F1     | GGTALRM | <a href="#">AAC</a> | -                | CoDA   |
| F2     | QRSSLVR | <a href="#">GTA</a> | -                | CoDA   |
| F3     | QQGNLQL | <a href="#">TAA</a> | -                | CoDA   |

[ZF DNA Sequence](#)

Bos taurus (cow) Build 3.1

Blast TAAGTAAAC

+ ZFA-unknown-67  
2792 tGGAGGAAACa 2802  
2792 aCCTCCTTTGT 2802

| FINGER | HELIX   | TRIPLET             | REFERENCE NUMBER | SOURCE |
|--------|---------|---------------------|------------------|--------|
| F1     | GGTALVM | <a href="#">AAC</a> | -                | CoDA   |
| F2     | QSAHLKR | <a href="#">GGA</a> | -                | CoDA   |
| F3     | QMSHLKR | <a href="#">GGA</a> | -                | CoDA   |

[ZF DNA Sequence](#)

Bos taurus (cow) Build 3.1

Blast GGAGGAAAC

+ ZFA-unknown-68  
2903 aTAAGCAAGGa 2913  
2903 tATTCGTTCT 2913

| FINGER | HELIX | TRIPLET | REFERENCE NUMBER | SOURCE |
|--------|-------|---------|------------------|--------|
|--------|-------|---------|------------------|--------|



|    |         |                     |   |      |
|----|---------|---------------------|---|------|
| F1 | RNEHLKV | <a href="#">AGG</a> | - | CoDA |
| F2 | QSTTLKR | <a href="#">GCA</a> | - | CoDA |
| F3 | QGGNLAL | <a href="#">TAA</a> | - | CoDA |

[ZF DNA Sequence](#)

Bos taurus (cow) Build 3.1

Blast TAAGCAAGG

- + ZFA-unknown-69  
2911 gGAAGGAGGTg 2921  
2911 cCTTCCTCCAc 2921

| FINGER | HELIX   | TRIPLET             | REFERENCE NUMBER | SOURCE |
|--------|---------|---------------------|------------------|--------|
| F1     | IPNHLAR | <a href="#">GGT</a> | -                | CoDA   |
| F2     | QSAHLKR | <a href="#">GGA</a> | -                | CoDA   |
| F3     | LGENLRR | <a href="#">GAA</a> | -                | CoDA   |

[ZF DNA Sequence](#)

Bos taurus (cow) Build 3.1

Blast GAAGGAGGT

- + ZFA-unknown-70  
2914 aGGAGGTGAAg 2924  
2914 tCCTCCACTTc 2924

| FINGER | HELIX    | TRIPLET             | REFERENCE NUMBER | SOURCE |
|--------|----------|---------------------|------------------|--------|
| F1     | RKPNLLR  | <a href="#">GAA</a> | -                | CoDA   |
| F2     | EAHHLRSR | <a href="#">GGT</a> | -                | CoDA   |
| F3     | QNSHLRR  | <a href="#">GGA</a> | -                | CoDA   |

[ZF DNA Sequence](#)

Bos taurus (cow) Build 3.1

Blast GGAGGTGAA

- + ZFA-unknown-71  
2917 aGGTGAAGGGa 2927  
2917 tCCTACTCCCT 2927

| FINGER | HELIX   | TRIPLET             | REFERENCE NUMBER | SOURCE |
|--------|---------|---------------------|------------------|--------|
| F1     | KRERLDR | <a href="#">GGG</a> | -                | CoDA   |
| F2     | QQTNLTR | <a href="#">GAA</a> | -                | CoDA   |
| F3     | IRHHLKR | <a href="#">GGT</a> | -                | CoDA   |

[ZF DNA Sequence](#)

Bos taurus (cow) Build 3.1

Blast GGTGAAGGG

+

ZFA-unknown-72  
2925 gGAGGGAGAAg 2935  
2925 cCTCCCTCTc 2935

| FINGER | HELIX   | TRIPLET             | REFERENCE NUMBER | SOURCE |
|--------|---------|---------------------|------------------|--------|
| F1     | QRSNLAR | <a href="#">GAA</a> | -                | CoDA   |
| F2     | QSAHLKR | <a href="#">GGA</a> | -                | CoDA   |
| F3     | VHWNLMR | <a href="#">GAG</a> | -                | CoDA   |

Bos taurus (cow) Build 3.1

[ZF DNA Sequence](#)

Blast GAGGGAGAA

⊕ ZFA-unknown-73  
2928 gGGAGAAGGA 2938  
2928 cCCTCTTCCTc 2938

| FINGER | HELIX   | TRIPLET             | REFERENCE NUMBER | SOURCE |
|--------|---------|---------------------|------------------|--------|
| F1     | RMERLDR | <a href="#">GGA</a> | -                | CoDA   |
| F2     | QQTNLTR | <a href="#">GAA</a> | -                | CoDA   |
| F3     | QTTHLSR | <a href="#">GGA</a> | -                | CoDA   |

Bos taurus (cow) Build 3.1

[ZF DNA Sequence](#)

Blast GGAGAAGGA

⊕ ZFA-unknown-74  
2931 aGAAGGAGAGa 2941  
2931 tCTTCCTCTc 2941

| FINGER | HELIX   | TRIPLET             | REFERENCE NUMBER | SOURCE |
|--------|---------|---------------------|------------------|--------|
| F1     | KHSNLTR | <a href="#">GAG</a> | -                | CoDA   |
| F2     | QSAHLKR | <a href="#">GGA</a> | -                | CoDA   |
| F3     | LGENLRR | <a href="#">GAA</a> | -                | CoDA   |

Bos taurus (cow) Build 3.1

[ZF DNA Sequence](#)

Blast GAAGGAGAG

⊕ ZFA-unknown-75  
2941 aGAAGCAGAGa 2951  
2941 tCTTCGTCTc 2951

| FINGER | HELIX   | TRIPLET             | REFERENCE NUMBER | SOURCE |
|--------|---------|---------------------|------------------|--------|
| F1     | KHSNLAR | <a href="#">GAG</a> | -                | CoDA   |
| F2     | QSTTLKR | <a href="#">GCA</a> | -                | CoDA   |
| F3     | QRNNLGR | <a href="#">GAA</a> | -                | CoDA   |

[ZF DNA Sequence](#)

Bos taurus (cow) Build 3.1

Blast GAAGCAGAG

⊕ ZFA-unknown-76

2949 aGAGGGAGAGg 2959

2949 tCTCCCTCTC 2959

| FINGER | HELIX   | TRIPLET             | REFERENCE NUMBER | SOURCE |
|--------|---------|---------------------|------------------|--------|
| F1     | KHSNLTR | <a href="#">GAG</a> | -                | CoDA   |
| F2     | QSAHLKR | <a href="#">GGA</a> | -                | CoDA   |
| F3     | VHWNLMR | <a href="#">GAG</a> | -                | CoDA   |

[ZF DNA Sequence](#)

Bos taurus (cow) Build 3.1

Blast GAGGGAGAG

⊕ ZFA-unknown-77

2952 gGGAGAGGAAg 2962

2952 cCCTCTCCTTc 2962

| FINGER | HELIX   | TRIPLET             | REFERENCE NUMBER | SOURCE |
|--------|---------|---------------------|------------------|--------|
| F1     | QASNLLR | <a href="#">GAA</a> | -                | CoDA   |
| F2     | RQDNLGR | <a href="#">GAG</a> | -                | CoDA   |
| F3     | QANHLSR | <a href="#">GGA</a> | -                | CoDA   |

[ZF DNA Sequence](#)

Bos taurus (cow) Build 3.1

Blast GGAGAGGAA

⊕ ZFA-unknown-78

2955 aGAGGAAGGAa 2965

2955 tCTCCTTCCTt 2965

| FINGER | HELIX   | TRIPLET             | REFERENCE NUMBER | SOURCE |
|--------|---------|---------------------|------------------|--------|
| F1     | RMERLDR | <a href="#">GGA</a> | -                | CoDA   |
| F2     | QQTNLTR | <a href="#">GAA</a> | -                | CoDA   |
| F3     | RRDNLNR | <a href="#">GAG</a> | -                | CoDA   |

[ZF DNA Sequence](#)

Bos taurus (cow) Build 3.1

Blast GAGGAAGGA

⊕ ZFA-unknown-79

2996 aGAGGAGGGAg 3006

2996 tCTCCTCCCTc 3006

| FINGER | HELIX   | TRIPLET             | REFERENCE NUMBER | SOURCE |
|--------|---------|---------------------|------------------|--------|
| F1     | THAHLTR | <a href="#">GGA</a> | -                | CoDA   |
| F2     | RQDNLGR | <a href="#">GAG</a> | -                | CoDA   |
| F3     | RVDNLPR | <a href="#">GAG</a> | -                | CoDA   |

Bos taurus (cow) Build 3.1

[ZF DNA Sequence](#)

Blast [GAGGAGGGA](#)

⊕ ZFA-unknown-80  
 2999 g[GAGGGAGAG](#)a 3009  
 2999 cTCCCTCTCt 3009

| FINGER | HELIX   | TRIPLET             | REFERENCE NUMBER | SOURCE |
|--------|---------|---------------------|------------------|--------|
| F1     | KHSNLTR | <a href="#">GAG</a> | -                | CoDA   |
| F2     | QSAHLKR | <a href="#">GGA</a> | -                | CoDA   |
| F3     | VHWNLMR | <a href="#">GAG</a> | -                | CoDA   |

Bos taurus (cow) Build 3.1

[ZF DNA Sequence](#)

Blast [GAGGGAGAG](#)

⊕ ZFA-unknown-81  
 3007 a[GAGGGAGGG](#)a 3017  
 3007 tCTCCCTCCct 3017

| FINGER | HELIX   | TRIPLET             | REFERENCE NUMBER | SOURCE |
|--------|---------|---------------------|------------------|--------|
| F1     | KKDHLHR | <a href="#">GGG</a> | -                | CoDA   |
| F2     | QSAHLKR | <a href="#">GGA</a> | -                | CoDA   |
| F3     | VHWNLMR | <a href="#">GAG</a> | -                | CoDA   |

Bos taurus (cow) Build 3.1

[ZF DNA Sequence](#)

Blast [GAGGGAGGG](#)

⊕ ZFA-unknown-82  
 3011 g[GAGGGAGGC](#)a 3021  
 3011 cTCCCTCCgt 3021

| FINGER | HELIX   | TRIPLET             | REFERENCE NUMBER | SOURCE |
|--------|---------|---------------------|------------------|--------|
| F1     | VPSKLLR | <a href="#">GGC</a> | -                | CoDA   |
| F2     | QSAHLKR | <a href="#">GGA</a> | -                | CoDA   |
| F3     | VHWNLMR | <a href="#">GAG</a> | -                | CoDA   |

Bos taurus (cow) Build 3.1

[ZF DNA Sequence](#)

Blast [GAGGGAGGC](#)

+ ZFA-unknown-83  
3026 gGGAGAAGAGa 3036  
3026 cCCTCTTCTc 3036

| FINGER | HELIX   | TRIPLET             | REFERENCE NUMBER | SOURCE |
|--------|---------|---------------------|------------------|--------|
| F1     | KHSNLTR | <a href="#">GAG</a> | -                | CoDA   |
| F2     | QQTNLTR | <a href="#">GAA</a> | -                | CoDA   |
| F3     | QTTHLSR | <a href="#">GGA</a> | -                | CoDA   |

[ZF DNA Sequence](#)

Bos taurus (cow) Build 3.1

Blast [GGAGAAGAG](#)

+ ZFA-unknown-84  
3055 aGGAGGAAGGg 3065  
3055 tCCTCCTTCCc 3065

| FINGER | HELIX   | TRIPLET             | REFERENCE NUMBER | SOURCE |
|--------|---------|---------------------|------------------|--------|
| F1     | RPHHLDA | <a href="#">AGG</a> | -                | CoDA   |
| F2     | QSAHLKR | <a href="#">GGA</a> | -                | CoDA   |
| F3     | QMSHLKR | <a href="#">GGA</a> | -                | CoDA   |

[ZF DNA Sequence](#)

Bos taurus (cow) Build 3.1

Blast [GGAGGAAGG](#)

+ ZFA-unknown-85  
3056 gGAGGAAGGGg 3066  
3056 cCTCCTTCCCc 3066

| FINGER | HELIX   | TRIPLET             | REFERENCE NUMBER | SOURCE |
|--------|---------|---------------------|------------------|--------|
| F1     | KRERLDR | <a href="#">GGG</a> | -                | CoDA   |
| F2     | QQTNLTR | <a href="#">GAA</a> | -                | CoDA   |
| F3     | RRDNLNR | <a href="#">GAG</a> | -                | CoDA   |

[ZF DNA Sequence](#)

Bos taurus (cow) Build 3.1

Blast [GAGGAAGGG](#)

+ ZFA-unknown-86  
3059 gGAAGGGGAGg 3069  
3059 cCTTCCCCTCc 3069

| FINGER | HELIX   | TRIPLET             | REFERENCE NUMBER | SOURCE |
|--------|---------|---------------------|------------------|--------|
| F1     | RNTNLTR | <a href="#">GAG</a> | -                | CoDA   |
| F2     | RREHLVR | <a href="#">GGG</a> | -                | CoDA   |

|    |         |            |   |      |
|----|---------|------------|---|------|
| F3 | QDGNLGR | <u>GAA</u> | - | CoDA |
|----|---------|------------|---|------|

[ZF DNA Sequence](#)

Bos taurus (cow) Build 3.1

Blast GAAGGGGAG

⊕ ZFA-unknown-87  
 3062 aGGGGAGGAGg 3072  
 3062 tCCCCTCCTCc 3072

| FINGER | HELIX   | TRIPLET    | REFERENCE NUMBER | SOURCE |
|--------|---------|------------|------------------|--------|
| F1     | RQMNLDR | <u>GAG</u> | -                | CoDA   |
| F2     | RQDNLGR | <u>GAG</u> | -                | CoDA   |
| F3     | RIDKLG  | <u>GGG</u> | -                | CoDA   |

[ZF DNA Sequence](#)

Bos taurus (cow) Build 3.1

Blast GGGGAGGAG

⊕ ZFA-unknown-88  
 3064 gGGAGGAGGAa 3074  
 3064 cCCTCCTCCTt 3074

| FINGER | HELIX   | TRIPLET    | REFERENCE NUMBER | SOURCE |
|--------|---------|------------|------------------|--------|
| F1     | RTDRLIR | <u>GGA</u> | -                | CoDA   |
| F2     | QSAHLKR | <u>GGA</u> | -                | CoDA   |
| F3     | QMSHLKR | <u>GGA</u> | -                | CoDA   |

[ZF DNA Sequence](#)

Bos taurus (cow) Build 3.1

Blast GGAGGAGGA

⊕ ZFA-unknown-89  
 3065 gGAGGAGGAAa 3075  
 3065 cCTCCTCCTTt 3075

| FINGER | HELIX   | TRIPLET    | REFERENCE NUMBER | SOURCE |
|--------|---------|------------|------------------|--------|
| F1     | QASNLLR | <u>GAA</u> | -                | CoDA   |
| F2     | RQDNLGR | <u>GAG</u> | -                | CoDA   |
| F3     | RVDNLPR | <u>GAG</u> | -                | CoDA   |

[ZF DNA Sequence](#)

Bos taurus (cow) Build 3.1

Blast GAGGAGGAA

⊕ ZFA-unknown-90  
 3068 gGAGGAAAGGa 3078  
 3068 cCTCCTTCCTt 3078

| FINGER | HELIX   | TRIPLET             | REFERENCE NUMBER | SOURCE |
|--------|---------|---------------------|------------------|--------|
| F1     | RMAHLHA | <a href="#">AGG</a> | -                | CoDA   |
| F2     | QQTNLTR | <a href="#">GAA</a> | -                | CoDA   |
| F3     | RRDNLNR | <a href="#">GAG</a> | -                | CoDA   |

[ZF DNA Sequence](#)

Blast GAGGAAAGG

Bos taurus (cow) Build 3.1

⊕ ZFA-unknown-91  
 3102 aGATGAAACa 3092  
 3102 tCTACTTTGt 3092

| FINGER | HELIX   | TRIPLET             | REFERENCE NUMBER | SOURCE |
|--------|---------|---------------------|------------------|--------|
| F1     | GASALRQ | <a href="#">AAC</a> | -                | CoDA   |
| F2     | QQTNLTR | <a href="#">GAA</a> | -                | CoDA   |
| F3     | VGSNLTR | <a href="#">GAT</a> | -                | CoDA   |

[ZF DNA Sequence](#)

Blast GATGAAAAC

Bos taurus (cow) Build 3.1

⊕ ZFA-unknown-92  
 3128 aTGCGGAGCAc 3118  
 3128 tACGCCTCGTg 3118

| FINGER | HELIX   | TRIPLET             | REFERENCE NUMBER | SOURCE |
|--------|---------|---------------------|------------------|--------|
| F1     | KNTRLSV | <a href="#">GCA</a> | -                | CoDA   |
| F2     | QSAHLKR | <a href="#">GGA</a> | -                | CoDA   |
| F3     | QRRSLGH | <a href="#">TGC</a> | -                | CoDA   |

[ZF DNA Sequence](#)

Blast TGCGGAGCA

Bos taurus (cow) Build 3.1

⊕ ZFA-unknown-93  
 3172 tGCAGGGTA 3162  
 3172 aCGTCCCCATA 3162

| FINGER | HELIX   | TRIPLET             | REFERENCE NUMBER | SOURCE |
|--------|---------|---------------------|------------------|--------|
| F1     | QQSSLLR | <a href="#">GTA</a> | -                | CoDA   |
| F2     | RREHLVR | <a href="#">GGG</a> | -                | CoDA   |
| F3     | QTATLKR | <a href="#">GCA</a> | -                | CoDA   |

[ZF DNA Sequence](#)

Bos taurus (cow) Build 3.1

Blast GCAGGGGTA

+ ZFA-unknown-94  
3376 aTGTGTGGGAc 3366  
3376 tACACACCCTg 3366

| FINGER | HELIX   | TRIPLET | REFERENCE NUMBER | SOURCE |
|--------|---------|---------|------------------|--------|
| F1     | THAHLTR | GGA     | -                | CoDA   |
| F2     | RREVLEN | GTG     | -                | CoDA   |
| F3     | QRHGLSS | TGT     | -                | CoDA   |

[ZF DNA Sequence](#)

Bos taurus (cow) Build 3.1

Blast TGTGTGGGA

+ ZFA-unknown-95  
3387 tGTGGCTGACa 3377  
3387 aCACCGACTGt 3377

| FINGER | HELIX   | TRIPLET | REFERENCE NUMBER | SOURCE |
|--------|---------|---------|------------------|--------|
| F1     | DLSNLKR | GAC     | -                | CoDA   |
| F2     | QRSDLTR | GCT     | -                | CoDA   |
| F3     | RPDALPR | GTG     | -                | CoDA   |

[ZF DNA Sequence](#)

Bos taurus (cow) Build 3.1

Blast GTGGCTGAC

+ ZFA-unknown-96  
3390 gTAGGCAGTCa 3400  
3390 cATCCGTCAGt 3400

| FINGER | HELIX   | TRIPLET | REFERENCE NUMBER | SOURCE |
|--------|---------|---------|------------------|--------|
| F1     | TGAVLTR | GTC     | -                | CoDA   |
| F2     | QSTTLKR | GCA     | -                | CoDA   |
| F3     | RRDGLAG | TAG     | -                | CoDA   |

[ZF DNA Sequence](#)

Bos taurus (cow) Build 3.1

Blast TAGGCAGTC

+ ZFA-unknown-97  
3412 aGTAGTTGATa 3402  
3412 tCATCAACTAt 3402

| FINGER | HELIX | TRIPLET | REFERENCE NUMBER | SOURCE |
|--------|-------|---------|------------------|--------|
|--------|-------|---------|------------------|--------|



|    |         |                     |   |      |
|----|---------|---------------------|---|------|
| F1 | TGQQLRV | <a href="#">GAT</a> | - | CoDA |
| F2 | HKSSLTR | <a href="#">GTT</a> | - | CoDA |
| F3 | QSTSLQR | <a href="#">GTA</a> | - | CoDA |

[ZF DNA Sequence](#)

Bos taurus (cow) Build 3.1

Blast GTAGTTGAT

- ZFA-unknown-98  
 3450 tGCCGCAGAAt 3440  
 3450 aCGGCGTCTTa 3440

| FINGER | HELIX   | TRIPLET             | REFERENCE NUMBER | SOURCE |
|--------|---------|---------------------|------------------|--------|
| F1     | QGSNLAR | <a href="#">GAA</a> | -                | CoDA   |
| F2     | QSTTLKR | <a href="#">GCA</a> | -                | CoDA   |
| F3     | DPSNLRR | <a href="#">GCC</a> | -                | CoDA   |

[ZF DNA Sequence](#)

Bos taurus (cow) Build 3.1

Blast GCCGCAGAA

- ZFA-unknown-99  
 3444 tGCGGCAGACT 3454  
 3444 aGCCCGTCTGa 3454

| FINGER | HELIX   | TRIPLET             | REFERENCE NUMBER | SOURCE |
|--------|---------|---------------------|------------------|--------|
| F1     | EEVNLRR | <a href="#">GAC</a> | -                | CoDA   |
| F2     | QSTTLKR | <a href="#">GCA</a> | -                | CoDA   |
| F3     | RLDMLAR | <a href="#">GCG</a> | -                | CoDA   |

[ZF DNA Sequence](#)

Bos taurus (cow) Build 3.1

Blast GCGGCAGAC

- ZFA-unknown-100  
 3447 gCAGACTAGt 3457  
 3447 cCGTCTGATCa 3457

| FINGER | HELIX   | TRIPLET             | REFERENCE NUMBER | SOURCE |
|--------|---------|---------------------|------------------|--------|
| F1     | RSHNLRL | <a href="#">TAG</a> | -                | CoDA   |
| F2     | DRGNLTR | <a href="#">GAC</a> | -                | CoDA   |
| F3     | QGNTLTR | <a href="#">GCA</a> | -                | CoDA   |

[ZF DNA Sequence](#)

Bos taurus (cow) Build 3.1

Blast GCAGACTAG

+

ZFA-unknown-101  
3525 aGTAGATGGT a 3535  
3525 tCATCTACCA t 3535

| FINGER | HELIX    | TRIPLET             | REFERENCE NUMBER | SOURCE |
|--------|----------|---------------------|------------------|--------|
| F1     | MKHHLLDA | <a href="#">GGT</a> | -                | CoDA   |
| F2     | VRHNLTR  | <a href="#">GAT</a> | -                | CoDA   |
| F3     | QSTSLQR  | <a href="#">GTA</a> | -                | CoDA   |

Bos taurus (cow) Build 3.1

[ZF DNA Sequence](#)

Blast GTAGATGGT

⊕ ZFA-unknown-102  
3577 tTGGGGATTC a 3567  
3577 aACCCCTAAG t 3567

| FINGER | HELIX   | TRIPLET             | REFERENCE NUMBER | SOURCE |
|--------|---------|---------------------|------------------|--------|
| F1     | RANHLTI | <a href="#">TTC</a> | -                | CoDA   |
| F2     | QSAHLKR | <a href="#">GGA</a> | -                | CoDA   |
| F3     | RSDHLSL | <a href="#">TGG</a> | -                | CoDA   |

Bos taurus (cow) Build 3.1

[ZF DNA Sequence](#)

Blast TGGGGATTC

⊕ ZFA-unknown-103  
3669 gGGTGTCTGT t 3659  
3669 cCCACAGACA a 3659

| FINGER | HELIX   | TRIPLET             | REFERENCE NUMBER | SOURCE |
|--------|---------|---------------------|------------------|--------|
| F1     | RKQHLVL | <a href="#">TGT</a> | -                | CoDA   |
| F2     | DHSSLKR | <a href="#">GTC</a> | -                | CoDA   |
| F3     | QPHHLPR | <a href="#">GGT</a> | -                | CoDA   |

Bos taurus (cow) Build 3.1

[ZF DNA Sequence](#)

Blast GGTGTCTGT

⊕ ZFA-unknown-104  
3672 aGTGGGTGTC t 3662  
3672 tCACCCACAG a 3662

| FINGER | HELIX   | TRIPLET             | REFERENCE NUMBER | SOURCE |
|--------|---------|---------------------|------------------|--------|
| F1     | TRAVLRR | <a href="#">GTC</a> | -                | CoDA   |
| F2     | EAHHLRS | <a href="#">GGT</a> | -                | CoDA   |
| F3     | RKDALHV | <a href="#">GTG</a> | -                | CoDA   |

[ZF DNA Sequence](#)

Bos taurus (cow) Build 3.1

Blast GTGGGTGTC

⊕ ZFA-unknown-105

3773 aTGTGAAGCTa 3763

3773 tACACTTCGAt 3763

| FINGER | HELIX   | TRIPLET             | REFERENCE NUMBER | SOURCE |
|--------|---------|---------------------|------------------|--------|
| F1     | QRQALDR | <a href="#">GCT</a> | -                | CoDA   |
| F2     | QQTNLTR | <a href="#">GAA</a> | -                | CoDA   |
| F3     | QPHGLTA | <a href="#">TGT</a> | -                | CoDA   |

[ZF DNA Sequence](#)

Bos taurus (cow) Build 3.1

Blast TGTGAAGCT

⊕ ZFA-unknown-106

3902 aGTTGATGTCa 3892

3902 tCAACTACAGt 3892

| FINGER | HELIX   | TRIPLET             | REFERENCE NUMBER | SOURCE |
|--------|---------|---------------------|------------------|--------|
| F1     | TKKILTV | <a href="#">GTC</a> | -                | CoDA   |
| F2     | VRHNLTR | <a href="#">GAT</a> | -                | CoDA   |
| F3     | HHNSLTR | <a href="#">GTT</a> | -                | CoDA   |

[ZF DNA Sequence](#)

Bos taurus (cow) Build 3.1

Blast GTTGATGTC

⊕ ZFA-unknown-107

3905 tGCAGTGTGATg 3895

3905 aCGTCAACTAc 3895

| FINGER | HELIX   | TRIPLET             | REFERENCE NUMBER | SOURCE |
|--------|---------|---------------------|------------------|--------|
| F1     | TGQQLRV | <a href="#">GAT</a> | -                | CoDA   |
| F2     | HKSSLTR | <a href="#">GTT</a> | -                | CoDA   |
| F3     | QGNTLTR | <a href="#">GCA</a> | -                | CoDA   |

[ZF DNA Sequence](#)

Bos taurus (cow) Build 3.1

Blast GCAGTTGAT

⊕ ZFA-unknown-108

3947 gTAAGTAGGAa 3937

3947 cATTTCATCCTa 3937

| FINGER | HELIX   | TRIPLET             | REFERENCE NUMBER | SOURCE |
|--------|---------|---------------------|------------------|--------|
| F1     | THAHLTR | <a href="#">GGA</a> | -                | CoDA   |
| F2     | QRSSLVR | <a href="#">GTA</a> | -                | CoDA   |
| F3     | QQGNLQL | <a href="#">TAA</a> | -                | CoDA   |

Bos taurus (cow) Build 3.1

[ZF DNA Sequence](#)

Blast TAAGTAGGA

⊕ ZFA-unknown-109  
 3949 tGGTGCTGACa 3959  
 3949 aCCACGACTGt 3959

| FINGER | HELIX   | TRIPLET             | REFERENCE NUMBER | SOURCE |
|--------|---------|---------------------|------------------|--------|
| F1     | DLSNLKR | <a href="#">GAC</a> | -                | CoDA   |
| F2     | QRSDLTR | <a href="#">GCT</a> | -                | CoDA   |
| F3     | HGHRLKT | <a href="#">GGT</a> | -                | CoDA   |

Bos taurus (cow) Build 3.1

[ZF DNA Sequence](#)

Blast GGTGCTGAC

⊕ ZFA-unknown-110  
 4039 cTGTGTAGTt 4049  
 4039 gACACATCAAa 4049

| FINGER | HELIX   | TRIPLET             | REFERENCE NUMBER | SOURCE |
|--------|---------|---------------------|------------------|--------|
| F1     | TSTRLDI | <a href="#">GTT</a> | -                | CoDA   |
| F2     | QRSSLVR | <a href="#">GTA</a> | -                | CoDA   |
| F3     | QPHGLAH | <a href="#">TGT</a> | -                | CoDA   |

Bos taurus (cow) Build 3.1

[ZF DNA Sequence](#)

Blast TGTGTAGTT

⊕ ZFA-unknown-111  
 4113 cTCTGAGTGTt 4123  
 4113 gAGACTCACAAa 4123

| FINGER | HELIX   | TRIPLET             | REFERENCE NUMBER | SOURCE |
|--------|---------|---------------------|------------------|--------|
| F1     | RHQHLKL | <a href="#">TGT</a> | -                | CoDA   |
| F2     | RQDNLGR | <a href="#">GAG</a> | -                | CoDA   |
| F3     | QRNTLKG | <a href="#">TCT</a> | -                | CoDA   |

Bos taurus (cow) Build 3.1

[ZF DNA Sequence](#)

Blast TCTGAGTGT

+ ZFA-unknown-112  
 4122 tTGGGATGCa 4132  
 4122 aACCCTAACGt 4132

| FINGER | HELIX   | TRIPLET             | REFERENCE NUMBER | SOURCE |
|--------|---------|---------------------|------------------|--------|
| F1     | RKRNLIM | <a href="#">TGC</a> | -                | CoDA   |
| F2     | VRHNLTR | <a href="#">GAT</a> | -                | CoDA   |
| F3     | RSDHLSL | <a href="#">TGG</a> | -                | CoDA   |

[ZF DNA Sequence](#)

Bos taurus (cow) Build 3.1

Blast TGGGATTGC

+ ZFA-unknown-113  
 4243 tTGTGTTGTt 4233  
 4243 aACACAAACAa 4233

| FINGER | HELIX   | TRIPLET             | REFERENCE NUMBER | SOURCE |
|--------|---------|---------------------|------------------|--------|
| F1     | RRQHLQY | <a href="#">TGT</a> | -                | CoDA   |
| F2     | HKSSLTR | <a href="#">GTT</a> | -                | CoDA   |
| F3     | QPHGLAH | <a href="#">TGT</a> | -                | CoDA   |

[ZF DNA Sequence](#)

Bos taurus (cow) Build 3.1

Blast TGTGTTGT

+ ZFA-unknown-114  
 4254 cTAAGAAGTCt 4264  
 4254 gATTCTTCAGa 4264

| FINGER | HELIX   | TRIPLET             | REFERENCE NUMBER | SOURCE |
|--------|---------|---------------------|------------------|--------|
| F1     | TSTLLNR | <a href="#">GTC</a> | -                | CoDA   |
| F2     | QQTNLTR | <a href="#">GAA</a> | -                | CoDA   |
| F3     | QGGNLAL | <a href="#">TAA</a> | -                | CoDA   |

[ZF DNA Sequence](#)

Bos taurus (cow) Build 3.1

Blast TAAGAAGTC

+ ZFA-unknown-115  
 4379 cTTTGTGTGa 4389  
 4379 gAAACAAACaT 4389

| FINGER | HELIX   | TRIPLET             | REFERENCE NUMBER | SOURCE |
|--------|---------|---------------------|------------------|--------|
| F1     | RRQHLQY | <a href="#">TGT</a> | -                | CoDA   |
| F2     | HKSSLTR | <a href="#">GTT</a> | -                | CoDA   |

|    |         |            |   |      |
|----|---------|------------|---|------|
| F3 | QRNALSG | <u>TTT</u> | - | CoDA |
|----|---------|------------|---|------|

[ZF DNA Sequence](#)

Bos taurus (cow) Build 3.1

Blast TTTTTTGT

⊕ ZFA-unknown-116  
 4474 aGAGGCAGGT 4484  
 4474 tCTCCGTCCAa 4484

| FINGER | HELIX   | TRIPLET    | REFERENCE NUMBER | SOURCE |
|--------|---------|------------|------------------|--------|
| F1     | TTTKLAI | <u>GGT</u> | -                | CoDA   |
| F2     | QSTTLKR | <u>GCA</u> | -                | CoDA   |
| F3     | RGDNLNR | <u>GAG</u> | -                | CoDA   |

[ZF DNA Sequence](#)

Bos taurus (cow) Build 3.1

Blast GAGGCAGGT

⊕ ZFA-unknown-117  
 4523 tTGTGCCGTGc 4533  
 4523 aACACGGCACg 4533

| FINGER | HELIX   | TRIPLET    | REFERENCE NUMBER | SOURCE |
|--------|---------|------------|------------------|--------|
| F1     | RTSSLKR | <u>GTG</u> | -                | CoDA   |
| F2     | DSSVLR  | <u>GCC</u> | -                | CoDA   |
| F3     | QAHGLTA | <u>TGT</u> | -                | CoDA   |

[ZF DNA Sequence](#)

Bos taurus (cow) Build 3.1

Blast TGTGCCGTGc

⊕ ZFA-unknown-118  
 4628 aTGGGTAGCAt 4638  
 4628 tACCCATCGTa 4638

| FINGER | HELIX   | TRIPLET    | REFERENCE NUMBER | SOURCE |
|--------|---------|------------|------------------|--------|
| F1     | HNGTLKR | <u>GCA</u> | -                | CoDA   |
| F2     | QRSSLVR | <u>GTA</u> | -                | CoDA   |
| F3     | RSDHLSL | <u>TGG</u> | -                | CoDA   |

[ZF DNA Sequence](#)

Bos taurus (cow) Build 3.1

Blast TGGGTAGCAt

⊕ ZFA-unknown-119  
 4669 tGATGGGTGTg 4659  
 4669 aCTACCCACAc 4659

| FINGER | HELIX   | TRIPLET             | REFERENCE NUMBER | SOURCE |
|--------|---------|---------------------|------------------|--------|
| F1     | RKQHLTL | <a href="#">TGT</a> | -                | CoDA   |
| F2     | RREHLVR | <a href="#">GGG</a> | -                | CoDA   |
| F3     | ISHNLAR | <a href="#">GAT</a> | -                | CoDA   |

[ZF DNA Sequence](#)

Bos taurus (cow) Build 3.1

Blast [GATGGGTGT](#)

⊕ ZFA-unknown-120  
 4672 tGGT**GAT**GGGt 4662  
 4672 aCCACTACCCa 4662

| FINGER | HELIX   | TRIPLET             | REFERENCE NUMBER | SOURCE |
|--------|---------|---------------------|------------------|--------|
| F1     | KKDHLHR | <a href="#">GGG</a> | -                | CoDA   |
| F2     | VRHNLTR | <a href="#">GAT</a> | -                | CoDA   |
| F3     | QPHLPR  | <a href="#">GGT</a> | -                | CoDA   |

[ZF DNA Sequence](#)

Bos taurus (cow) Build 3.1

Blast [GGTGATGGG](#)

⊕ ZFA-unknown-121  
 4720 gTAA**GAG**GTTt 4710  
 4720 cATTCTCCAAa 4710

| FINGER | HELIX   | TRIPLET             | REFERENCE NUMBER | SOURCE |
|--------|---------|---------------------|------------------|--------|
| F1     | TTTVLAR | <a href="#">GTT</a> | -                | CoDA   |
| F2     | RQDNLGR | <a href="#">GAG</a> | -                | CoDA   |
| F3     | QGGNLTL | <a href="#">TAA</a> | -                | CoDA   |

[ZF DNA Sequence](#)

Bos taurus (cow) Build 3.1

Blast [TAAGAGGT](#)

⊕ ZFA-unknown-122  
 4735 aGT**GCT**GCTa 4725  
 4735 tCACCGACGAt 4725

| FINGER | HELIX   | TRIPLET             | REFERENCE NUMBER | SOURCE |
|--------|---------|---------------------|------------------|--------|
| F1     | MKNTLTR | <a href="#">GCT</a> | -                | CoDA   |
| F2     | QRSDLTR | <a href="#">GCT</a> | -                | CoDA   |
| F3     | RPDALPR | <a href="#">GTG</a> | -                | CoDA   |

[ZF DNA Sequence](#)

Bos taurus (cow) Build 3.1

Blast GTGGCTGCT

+ ZFA-unknown-123  
4738 gGAAGTGGCTg 4728  
4738 cCTTACCGAc 4728

| FINGER | HELIX   | TRIPLET | REFERENCE NUMBER | SOURCE |
|--------|---------|---------|------------------|--------|
| F1     | TKPILVR | GCT     | -                | CoDA   |
| F2     | RREVLEN | GTG     | -                | CoDA   |
| F3     | QTVNLDR | GAA     | -                | CoDA   |

[ZF DNA Sequence](#)

Bos taurus (cow) Build 3.1

Blast GAAGTGGCT

+ ZFA-unknown-124  
4751 gGCTGGAGGAa 4741  
4751 cCGACCTCCTt 4741

| FINGER | HELIX   | TRIPLET | REFERENCE NUMBER | SOURCE |
|--------|---------|---------|------------------|--------|
| F1     | RTDRLIR | GGA     | -                | CoDA   |
| F2     | QSAHLKR | GGA     | -                | CoDA   |
| F3     | LKHDLRR | GCT     | -                | CoDA   |

[ZF DNA Sequence](#)

Bos taurus (cow) Build 3.1

Blast GCTGGAGGA

+ ZFA-unknown-125  
4754 aGGGGCTGGAg 4744  
4754 tCCCCGACCTc 4744

| FINGER | HELIX   | TRIPLET | REFERENCE NUMBER | SOURCE |
|--------|---------|---------|------------------|--------|
| F1     | RPAKLVL | GGA     | -                | CoDA   |
| F2     | QRSDLTR | GCT     | -                | CoDA   |
| F3     | RTEHLAR | GGG     | -                | CoDA   |

[ZF DNA Sequence](#)

Bos taurus (cow) Build 3.1

Blast GGGGCTGGA

+ ZFA-unknown-126  
4779 tGTAGAAACa 4769  
4779 aCATCTTTTgt 4769

| FINGER | HELIX | TRIPLET | REFERENCE NUMBER | SOURCE |
|--------|-------|---------|------------------|--------|
|--------|-------|---------|------------------|--------|



|    |         |                     |   |      |
|----|---------|---------------------|---|------|
| F1 | GASALRQ | <a href="#">AAC</a> | - | CoDA |
| F2 | QQTNLTR | <a href="#">GAA</a> | - | CoDA |
| F3 | QSTSLQR | <a href="#">GTA</a> | - | CoDA |

[ZF DNA Sequence](#)

Blast GTAGAAAAC

Bos taurus (cow) Build 3.1

- + ZFA-unknown-127  
 4782 aGATGTAGAAa 4772  
 4782 tCTACATCTTt 4772

| FINGER | HELIX    | TRIPLET             | REFERENCE NUMBER | SOURCE |
|--------|----------|---------------------|------------------|--------|
| F1     | HRPNLTR  | <a href="#">GAA</a> | -                | CoDA   |
| F2     | QRSSLVR  | <a href="#">GTA</a> | -                | CoDA   |
| F3     | VGHNLRSR | <a href="#">GAT</a> | -                | CoDA   |

[ZF DNA Sequence](#)

Blast GATGTAGAA

Bos taurus (cow) Build 3.1

- + ZFA-unknown-128  
 4785 tGTAGATGTAg 4775  
 4785 aCATCTACATc 4775

| FINGER | HELIX   | TRIPLET             | REFERENCE NUMBER | SOURCE |
|--------|---------|---------------------|------------------|--------|
| F1     | QQQALVR | <a href="#">GTA</a> | -                | CoDA   |
| F2     | VRHNLTR | <a href="#">GAT</a> | -                | CoDA   |
| F3     | QSTSLQR | <a href="#">GTA</a> | -                | CoDA   |

[ZF DNA Sequence](#)

Blast GTAGATGTA

Bos taurus (cow) Build 3.1

- + ZFA-unknown-129  
 4828 aTAGGTAGCCt 4838  
 4828 tATCCATCGGa 4838

| FINGER | HELIX   | TRIPLET             | REFERENCE NUMBER | SOURCE |
|--------|---------|---------------------|------------------|--------|
| F1     | DGSTLRR | <a href="#">GCC</a> | -                | CoDA   |
| F2     | QRSSLVR | <a href="#">GTA</a> | -                | CoDA   |
| F3     | RLDGLAG | <a href="#">TAG</a> | -                | CoDA   |

[ZF DNA Sequence](#)

Blast TAGGTAGCC

Bos taurus (cow) Build 3.1

+

ZFA-unknown-130  
4840 tTGTGTATGTc 4850  
4840 aACACATACAg 4850

| FINGER | HELIX   | TRIPLET             | REFERENCE NUMBER | SOURCE |
|--------|---------|---------------------|------------------|--------|
| F1     | RKQHLQL | <a href="#">TGT</a> | -                | CoDA   |
| F2     | QRSSLVR | <a href="#">GTA</a> | -                | CoDA   |
| F3     | QPHGLAH | <a href="#">TGT</a> | -                | CoDA   |

[ZF DNA Sequence](#)

Bos taurus (cow) Build 3.1

Blast TGTGTATGT

⊕ ZFA-unknown-131  
4891 tGTAGCATGTa 4901  
4891 aCATCGTACAt 4901

| FINGER | HELIX   | TRIPLET             | REFERENCE NUMBER | SOURCE |
|--------|---------|---------------------|------------------|--------|
| F1     | RRQHLQY | <a href="#">TGT</a> | -                | CoDA   |
| F2     | QSTTLKR | <a href="#">GCA</a> | -                | CoDA   |
| F3     | QKVSLKR | <a href="#">GTA</a> | -                | CoDA   |

[ZF DNA Sequence](#)

Bos taurus (cow) Build 3.1

Blast GTAGCATGT

⊕ ZFA-unknown-132  
4925 tTGTGTTGGT a 4935  
4925 aACACAACCA t 4935

| FINGER | HELIX   | TRIPLET             | REFERENCE NUMBER | SOURCE |
|--------|---------|---------------------|------------------|--------|
| F1     | RRQKLTI | <a href="#">GGT</a> | -                | CoDA   |
| F2     | HKSSLTR | <a href="#">GTT</a> | -                | CoDA   |
| F3     | QPHGLAH | <a href="#">TGT</a> | -                | CoDA   |

[ZF DNA Sequence](#)

Bos taurus (cow) Build 3.1

Blast TGTGTTGGT

⊕ ZFA-unknown-133  
4975 tTGGGTTGGC a 4985  
4975 aACCCAACCG t 4985

| FINGER | HELIX   | TRIPLET             | REFERENCE NUMBER | SOURCE |
|--------|---------|---------------------|------------------|--------|
| F1     | APSKLKR | <a href="#">GGC</a> | -                | CoDA   |
| F2     | HKSSLTR | <a href="#">GTT</a> | -                | CoDA   |
| F3     | RSDHLSL | <a href="#">TGG</a> | -                | CoDA   |

[ZF DNA Sequence](#)

Bos taurus (cow) Build 3.1

Blast TGGGTTGGC

⊕ ZFA-unknown-134

5025 tTGTGTTGTTt 5035

5025 aACACAACAAa 5035

| FINGER | HELIX   | TRIPLET             | REFERENCE NUMBER | SOURCE |
|--------|---------|---------------------|------------------|--------|
| F1     | TKPVLKI | <a href="#">GTT</a> | -                | CoDA   |
| F2     | HKSSLTR | <a href="#">GTT</a> | -                | CoDA   |
| F3     | QPHGLAH | <a href="#">TGT</a> | -                | CoDA   |

[ZF DNA Sequence](#)

Bos taurus (cow) Build 3.1

Blast TGTGTTGTT

⊕ ZFA-unknown-135

5041 aGGTGGAAACa 5031

5041 tCCACCTTTGt 5031

| FINGER | HELIX   | TRIPLET             | REFERENCE NUMBER | SOURCE |
|--------|---------|---------------------|------------------|--------|
| F1     | GGTALVM | <a href="#">AAC</a> | -                | CoDA   |
| F2     | QSAHLKR | <a href="#">GGA</a> | -                | CoDA   |
| F3     | IRHHLKR | <a href="#">GGT</a> | -                | CoDA   |

[ZF DNA Sequence](#)

Bos taurus (cow) Build 3.1

Blast GGTGGAAAC

⊕ ZFA-unknown-136

5050 tTGTGAATAGt 5060

5050 aACACTTATCa 5060

| FINGER | HELIX   | TRIPLET             | REFERENCE NUMBER | SOURCE |
|--------|---------|---------------------|------------------|--------|
| F1     | RRRNLQI | <a href="#">TAG</a> | -                | CoDA   |
| F2     | QQTNLTR | <a href="#">GAA</a> | -                | CoDA   |
| F3     | QPHGLTA | <a href="#">TGT</a> | -                | CoDA   |

[ZF DNA Sequence](#)

Bos taurus (cow) Build 3.1

Blast TGTGAATAG

⊕ ZFA-unknown-137

5115 aGATGTATAGg 5125

5115 tCTACATATCc 5125

| FINGER | HELIX   | TRIPLET             | REFERENCE NUMBER | SOURCE |
|--------|---------|---------------------|------------------|--------|
| F1     | RAHNLLL | <a href="#">TAG</a> | -                | CoDA   |
| F2     | QRSSLVR | <a href="#">GTA</a> | -                | CoDA   |
| F3     | VGHNLSR | <a href="#">GAT</a> | -                | CoDA   |

[ZF DNA Sequence](#)

Bos taurus (cow) Build 3.1

Blast GATGTATAG

⊕ ZFA-unknown-138  
 5123 aGGGGTAGAAt 5133  
 5123 tCCCCATCTTa 5133

| FINGER | HELIX   | TRIPLET             | REFERENCE NUMBER | SOURCE |
|--------|---------|---------------------|------------------|--------|
| F1     | HRPNLTR | <a href="#">GAA</a> | -                | CoDA   |
| F2     | QRSSLVR | <a href="#">GTA</a> | -                | CoDA   |
| F3     | RTEHLAR | <a href="#">GGG</a> | -                | CoDA   |

[ZF DNA Sequence](#)

Bos taurus (cow) Build 3.1

Blast GGGGTAGAA

⊕ ZFA-unknown-139  
 5205 aGGTGCAGCTc 5195  
 5205 tCCACGTCGAg 5195

| FINGER | HELIX   | TRIPLET             | REFERENCE NUMBER | SOURCE |
|--------|---------|---------------------|------------------|--------|
| F1     | TKQILGR | <a href="#">GCT</a> | -                | CoDA   |
| F2     | QSTTLKR | <a href="#">GCA</a> | -                | CoDA   |
| F3     | VDHHLRR | <a href="#">GGT</a> | -                | CoDA   |

[ZF DNA Sequence](#)

Bos taurus (cow) Build 3.1

Blast GGTGCAGCT

⊕ ZFA-unknown-140  
 5250 tTGTGGAGAAa 5240  
 5250 aACACCTCTTt 5240

| FINGER | HELIX   | TRIPLET             | REFERENCE NUMBER | SOURCE |
|--------|---------|---------------------|------------------|--------|
| F1     | QRSNLAR | <a href="#">GAA</a> | -                | CoDA   |
| F2     | QSAHLKR | <a href="#">GGA</a> | -                | CoDA   |
| F3     | QPHGLAH | <a href="#">TGT</a> | -                | CoDA   |

[ZF DNA Sequence](#)

Bos taurus (cow) Build 3.1

Blast TGTGGAGAA

+ ZFA-unknown-141  
5352 tGACGCTGAGa 5362  
5352 aCTGCGACTct 5362

| FINGER | HELIX   | TRIPLET             | REFERENCE NUMBER | SOURCE |
|--------|---------|---------------------|------------------|--------|
| F1     | KHSNLTR | <a href="#">GAG</a> | -                | CoDA   |
| F2     | QRSDLTR | <a href="#">GCT</a> | -                | CoDA   |
| F3     | DPSNLRR | <a href="#">GAC</a> | -                | CoDA   |

[ZF DNA Sequence](#)

Bos taurus (cow) Build 3.1

Blast [GACGCTGAG](#)

+ ZFA-unknown-142  
5378 tGTTGGTAACt 5388  
5378 aCAACCATTGa 5388

| FINGER | HELIX   | TRIPLET             | REFERENCE NUMBER | SOURCE |
|--------|---------|---------------------|------------------|--------|
| F1     | GASALRS | <a href="#">AAC</a> | -                | CoDA   |
| F2     | EAHHLSR | <a href="#">GGT</a> | -                | CoDA   |
| F3     | IRTSLKR | <a href="#">GTT</a> | -                | CoDA   |

[ZF DNA Sequence](#)

Bos taurus (cow) Build 3.1

Blast [GTTGGTAAC](#)

+ ZFA-unknown-143  
5434 gGGTGAAGGAc 5424  
5434 cCCACTTCCTg 5424

| FINGER | HELIX   | TRIPLET             | REFERENCE NUMBER | SOURCE |
|--------|---------|---------------------|------------------|--------|
| F1     | RMERLDR | <a href="#">GGA</a> | -                | CoDA   |
| F2     | QQTNLTR | <a href="#">GAA</a> | -                | CoDA   |
| F3     | IRHHLKR | <a href="#">GGT</a> | -                | CoDA   |

[ZF DNA Sequence](#)

Bos taurus (cow) Build 3.1

Blast [GGTGAAGGA](#)

+ ZFA-unknown-144  
5457 tTGTGTGCTa 5467  
5457 aACACAACGAt 5467

| FINGER | HELIX   | TRIPLET             | REFERENCE NUMBER | SOURCE |
|--------|---------|---------------------|------------------|--------|
| F1     | TKQILGR | <a href="#">GCT</a> | -                | CoDA   |
| F2     | HKSSLTR | <a href="#">GTT</a> | -                | CoDA   |

|    |         |            |   |      |
|----|---------|------------|---|------|
| F3 | QPHGLAH | <u>TGT</u> | - | CoDA |
|----|---------|------------|---|------|

[ZF DNA Sequence](#) Bos taurus (cow) Build 3.1

**Blast** TGTGTTGCT

⊕ ZFA-unknown-145  
 5465 cTAAGTTGTAa 5475  
 5465 gATTCAACATt 5475

| FINGER | HELIX   | TRIPLET    | REFERENCE NUMBER | SOURCE |
|--------|---------|------------|------------------|--------|
| F1     | QQQALKR | <u>GTA</u> | -                | CoDA   |
| F2     | HKSSLTR | <u>GTT</u> | -                | CoDA   |
| F3     | QQGNLQL | <u>TAA</u> | -                | CoDA   |

[ZF DNA Sequence](#) Bos taurus (cow) Build 3.1

**Blast** TAAGTTGTA

⊕ ZFA-unknown-146  
 5638 gTAAGCAGCAa 5628  
 5638 cATTCGTCGTt 5628

| FINGER | HELIX   | TRIPLET    | REFERENCE NUMBER | SOURCE |
|--------|---------|------------|------------------|--------|
| F1     | QRGTLNR | <u>GCA</u> | -                | CoDA   |
| F2     | QSTTLKR | <u>GCA</u> | -                | CoDA   |
| F3     | QGGNLAL | <u>TAA</u> | -                | CoDA   |

[ZF DNA Sequence](#) Bos taurus (cow) Build 3.1

**Blast** TAAGCAGCA

⊕ ZFA-unknown-147  
 5699 aTAGGGAGAAa 5689  
 5699 tATCCCTCTTt 5689

| FINGER | HELIX   | TRIPLET    | REFERENCE NUMBER | SOURCE |
|--------|---------|------------|------------------|--------|
| F1     | QRSNLAR | <u>GAA</u> | -                | CoDA   |
| F2     | QSAHLKR | <u>GGA</u> | -                | CoDA   |
| F3     | RPEGLST | <u>TAG</u> | -                | CoDA   |

[ZF DNA Sequence](#) Bos taurus (cow) Build 3.1

**Blast** TAGGGAGAA

⊕ ZFA-unknown-148  
 5709 aGAAGAAACa 5699  
 5709 tCTTCTTTGTt 5699

| FINGER | HELIX   | TRIPLET             | REFERENCE NUMBER | SOURCE |
|--------|---------|---------------------|------------------|--------|
| F1     | GASALRQ | <a href="#">AAC</a> | -                | CoDA   |
| F2     | QQTNLTR | <a href="#">GAA</a> | -                | CoDA   |
| F3     | QTNNLNR | <a href="#">GAA</a> | -                | CoDA   |

[ZF DNA Sequence](#)

Blast GAAGAAAAC

Bos taurus (cow) Build 3.1

- ZFA-unknown-149  
 5806 tGCAGCTGTCc 5816  
 5806 aCGTCGACAGg 5816

| FINGER | HELIX   | TRIPLET             | REFERENCE NUMBER | SOURCE |
|--------|---------|---------------------|------------------|--------|
| F1     | TRAVLRR | <a href="#">GTC</a> | -                | CoDA   |
| F2     | QRSDLTR | <a href="#">GCT</a> | -                | CoDA   |
| F3     | QGGTLRR | <a href="#">GCA</a> | -                | CoDA   |

[ZF DNA Sequence](#)

Blast GCAGCTGTC

Bos taurus (cow) Build 3.1

- ZFA-unknown-150  
 5824 tGGTGCTGGGa 5814  
 5824 aCCACGACCct 5814

| FINGER | HELIX   | TRIPLET             | REFERENCE NUMBER | SOURCE |
|--------|---------|---------------------|------------------|--------|
| F1     | KKDHLHR | <a href="#">GGG</a> | -                | CoDA   |
| F2     | QRSDLTR | <a href="#">GCT</a> | -                | CoDA   |
| F3     | HGHRLKT | <a href="#">GGT</a> | -                | CoDA   |

[ZF DNA Sequence](#)

Blast GGTGCTGGG

Bos taurus (cow) Build 3.1

- ZFA-unknown-151  
 5824 aTTTGTGAAg 5834  
 5824 tAAACAACtTc 5834

| FINGER | HELIX   | TRIPLET             | REFERENCE NUMBER | SOURCE |
|--------|---------|---------------------|------------------|--------|
| F1     | QRSNLAR | <a href="#">GAA</a> | -                | CoDA   |
| F2     | HKSSLTR | <a href="#">GTT</a> | -                | CoDA   |
| F3     | QRNALSG | <a href="#">TTT</a> | -                | CoDA   |

[ZF DNA Sequence](#)

Bos taurus (cow) Build 3.1

Blast TTTGTTGAA

+ ZFA-unknown-152  
5827 tGTTGAAGAGa 5837  
5827 aCAACTTCTct 5837

| FINGER | HELIX   | TRIPLET             | REFERENCE NUMBER | SOURCE |
|--------|---------|---------------------|------------------|--------|
| F1     | KHSNLTR | <a href="#">GAG</a> | -                | CoDA   |
| F2     | QQTNLTR | <a href="#">GAA</a> | -                | CoDA   |
| F3     | VGGSLNR | <a href="#">GTT</a> | -                | CoDA   |

[ZF DNA Sequence](#)

Bos taurus (cow) Build 3.1

Blast GTTGAAGAG

+ ZFA-unknown-153  
5874 aGAAGGGTGTc 5864  
5874 tCTTCCACAg 5864

| FINGER | HELIX   | TRIPLET             | REFERENCE NUMBER | SOURCE |
|--------|---------|---------------------|------------------|--------|
| F1     | RKQHLTL | <a href="#">TGT</a> | -                | CoDA   |
| F2     | RREHLVR | <a href="#">GGG</a> | -                | CoDA   |
| F3     | QDGNLGR | <a href="#">GAA</a> | -                | CoDA   |

[ZF DNA Sequence](#)

Bos taurus (cow) Build 3.1

Blast GAAGGGTGT

+ ZFA-unknown-154  
6080 tTAGGATTAGg 6090  
6080 aATCCTAATCc 6090

| FINGER | HELIX   | TRIPLET             | REFERENCE NUMBER | SOURCE |
|--------|---------|---------------------|------------------|--------|
| F1     | RSHNLRL | <a href="#">TAG</a> | -                | CoDA   |
| F2     | VRHNLTR | <a href="#">GAT</a> | -                | CoDA   |
| F3     | RIDHLVP | <a href="#">TAG</a> | -                | CoDA   |

[ZF DNA Sequence](#)

Bos taurus (cow) Build 3.1

Blast TAGGATTAG

+ ZFA-unknown-155  
6224 gGTAGTGTGCTa 6234  
6224 cCATCAACGAt 6234

| FINGER | HELIX | TRIPLET | REFERENCE NUMBER | SOURCE |
|--------|-------|---------|------------------|--------|
|--------|-------|---------|------------------|--------|



|    |         |                     |   |      |
|----|---------|---------------------|---|------|
| F1 | TKQILGR | <a href="#">GCT</a> | - | CoDA |
| F2 | HKSSLTR | <a href="#">GTT</a> | - | CoDA |
| F3 | QSTSLQR | <a href="#">GTA</a> | - | CoDA |

[ZF DNA Sequence](#)

Bos taurus (cow) Build 3.1

Blast GTAGTTGCT

- + ZFA-unknown-156  
 6269 tGCAGTGGAAc 6259  
 6269 aCGTCACCTTg 6259

| FINGER | HELIX   | TRIPLET             | REFERENCE NUMBER | SOURCE |
|--------|---------|---------------------|------------------|--------|
| F1     | HKPNLHR | <a href="#">GAA</a> | -                | CoDA   |
| F2     | RREVLEN | <a href="#">GTG</a> | -                | CoDA   |
| F3     | QGGTLRR | <a href="#">GCA</a> | -                | CoDA   |

[ZF DNA Sequence](#)

Bos taurus (cow) Build 3.1

Blast GCAGTGGAA

- + ZFA-unknown-157  
 6297 tGTTGCCCTGTa 6307  
 6297 aCAACGGACAt 6307

| FINGER | HELIX   | TRIPLET             | REFERENCE NUMBER | SOURCE |
|--------|---------|---------------------|------------------|--------|
| F1     | RKQHLTL | <a href="#">TGT</a> | -                | CoDA   |
| F2     | DSSVLRR | <a href="#">GCC</a> | -                | CoDA   |
| F3     | IRTSLKR | <a href="#">GTT</a> | -                | CoDA   |

[ZF DNA Sequence](#)

Bos taurus (cow) Build 3.1

Blast GTTGCTGT

- + ZFA-unknown-158  
 6387 aGCTGAAGACT 6397  
 6387 tCGACTTCTGa 6397

| FINGER | HELIX   | TRIPLET             | REFERENCE NUMBER | SOURCE |
|--------|---------|---------------------|------------------|--------|
| F1     | DEANLRR | <a href="#">GAC</a> | -                | CoDA   |
| F2     | QQTNLTR | <a href="#">GAA</a> | -                | CoDA   |
| F3     | VGNLSTR | <a href="#">GCT</a> | -                | CoDA   |

[ZF DNA Sequence](#)

Bos taurus (cow) Build 3.1

Blast GCTGAAGAC

+

ZFA-unknown-159  
6427 tGAGGAAGACa 6417  
6427 aCTCCTTCTGt 6417

| FINGER | HELIX   | TRIPLET | REFERENCE NUMBER | SOURCE |
|--------|---------|---------|------------------|--------|
| F1     | DEANLRR | GAC     | -                | CoDA   |
| F2     | QQTNLTR | GAA     | -                | CoDA   |
| F3     | RRDNLNR | GAG     | -                | CoDA   |

Bos taurus (cow) Build 3.1

[ZF DNA Sequence](#)

Blast GAGGAAGAC

⊕ ZFA-unknown-160  
6430 tGGTGCAGCTa 6440  
6430 aCCACGTCGAt 6440

| FINGER | HELIX   | TRIPLET | REFERENCE NUMBER | SOURCE |
|--------|---------|---------|------------------|--------|
| F1     | TKQILGR | GCT     | -                | CoDA   |
| F2     | QSTTLKR | GCA     | -                | CoDA   |
| F3     | VDHHLRR | GGT     | -                | CoDA   |

Bos taurus (cow) Build 3.1

[ZF DNA Sequence](#)

Blast GGTGCAGCT

⊕ ZFA-unknown-161  
6452 cTGTGTGGCTg 6462  
6452 gACACACCGAc 6462

| FINGER | HELIX   | TRIPLET | REFERENCE NUMBER | SOURCE |
|--------|---------|---------|------------------|--------|
| F1     | TKPILVR | GCT     | -                | CoDA   |
| F2     | RREVLEN | GTG     | -                | CoDA   |
| F3     | QRHGLSS | TGT     | -                | CoDA   |

Bos taurus (cow) Build 3.1

[ZF DNA Sequence](#)

Blast TGTGTGGCT

⊕ ZFA-unknown-162  
6455 tGTGGCTGTTa 6465  
6455 aCACCGACAAt 6465

| FINGER | HELIX   | TRIPLET | REFERENCE NUMBER | SOURCE |
|--------|---------|---------|------------------|--------|
| F1     | QATLLRR | GTT     | -                | CoDA   |
| F2     | QRSDLTR | GCT     | -                | CoDA   |
| F3     | RPDALPR | GTG     | -                | CoDA   |

[ZF DNA Sequence](#)

Bos taurus (cow) Build 3.1

Blast GTGGCTGT

⊕ ZFA-unknown-163

6703 aGGGAGAACT 6693

6703 tCCCCTCTGa 6693

| FINGER | HELIX   | TRIPLET             | REFERENCE NUMBER | SOURCE |
|--------|---------|---------------------|------------------|--------|
| F1     | GHTALRN | <a href="#">AAC</a> | -                | CoDA   |
| F2     | RQDNLGR | <a href="#">GAG</a> | -                | CoDA   |
| F3     | RIDKLGG | <a href="#">GGG</a> | -                | CoDA   |

[ZF DNA Sequence](#)

Bos taurus (cow) Build 3.1

Blast GGGGAGAAC

⊕ ZFA-unknown-164

6710 gGTAGCAAGGg 6700

6710 cCATCGTTCCc 6700

| FINGER | HELIX   | TRIPLET             | REFERENCE NUMBER | SOURCE |
|--------|---------|---------------------|------------------|--------|
| F1     | RNEHLKV | <a href="#">AGG</a> | -                | CoDA   |
| F2     | QSTTLKR | <a href="#">GCA</a> | -                | CoDA   |
| F3     | QKVSLKR | <a href="#">GTA</a> | -                | CoDA   |

[ZF DNA Sequence](#)

Bos taurus (cow) Build 3.1

Blast GTAGCAAGG

⊕ ZFA-unknown-165

6729 aGCAGAAATAGt 6719

6729 tCGTCTTATCa 6719

| FINGER | HELIX   | TRIPLET             | REFERENCE NUMBER | SOURCE |
|--------|---------|---------------------|------------------|--------|
| F1     | RRRNLQI | <a href="#">TAG</a> | -                | CoDA   |
| F2     | QQTNLTR | <a href="#">GAA</a> | -                | CoDA   |
| F3     | QGNTLTR | <a href="#">GCA</a> | -                | CoDA   |

[ZF DNA Sequence](#)

Bos taurus (cow) Build 3.1

Blast GCAGAAATAG

⊕ ZFA-unknown-166

6791 aTGGGAATGTg 6801

6791 tACCCTTACAc 6801

| FINGER | HELIX   | TRIPLET    | REFERENCE NUMBER | SOURCE |
|--------|---------|------------|------------------|--------|
| F1     | RRQHLQY | <u>TGT</u> | -                | CoDA   |
| F2     | QQTNLTR | <u>GAA</u> | -                | CoDA   |
| F3     | RSDHLSL | <u>TGG</u> | -                | CoDA   |

Bos taurus (cow) Build 3.1

[ZF DNA Sequence](#)

Blast TGGGAATGT

⊕ ZFA-unknown-167  
 6799 gTGGGAATGCc 6809  
 6799 cACCCTTACGg 6809

| FINGER | HELIX   | TRIPLET    | REFERENCE NUMBER | SOURCE |
|--------|---------|------------|------------------|--------|
| F1     | RRRNLTL | <u>TGC</u> | -                | CoDA   |
| F2     | QQTNLTR | <u>GAA</u> | -                | CoDA   |
| F3     | RSDHLSL | <u>TGG</u> | -                | CoDA   |

Bos taurus (cow) Build 3.1

[ZF DNA Sequence](#)

Blast TGGGAATGC

⊕ ZFA-unknown-168  
 6863 tTGTGATGCa 6873  
 6863 aACACTAACGt 6873

| FINGER | HELIX   | TRIPLET    | REFERENCE NUMBER | SOURCE |
|--------|---------|------------|------------------|--------|
| F1     | RKRNLIM | <u>TGC</u> | -                | CoDA   |
| F2     | VRHNLTR | <u>GAT</u> | -                | CoDA   |
| F3     | QPHGLAH | <u>TGT</u> | -                | CoDA   |

Bos taurus (cow) Build 3.1

[ZF DNA Sequence](#)

Blast TGTGATTGC

⊕
