# Supplementary material for: Targeting wild-type Erythrocyte receptors for Plasmodium falciparum and vivax Merozoites by Zinc Finger Nucleases In- silico: Towards a Genetic Vaccine against Malaria
Source: PubMed Central journal article supplement (PMC3500210; doi:10.1186/1479-0556-10-8), 2012-08-31
Supplement: 1479-0556-10-8-S3.pdf [file 1479-0556-10-8-S3.pdf]

**Zinc Finger Site Type:** Nuclease  
**Zinc Finger Engineering Method:** CoDA  
**Sequence Name :** darc  
**Sequence Length:**2.49kb

**Nucleotide Sequence**

```
:nTTTTTCCTGAGTGTAGTCCCAACCAGCCAAATCCAACCTCAAACAGGAAG
ACCCAAGGCCAGTGACCCCCATAGGCCTGAGGCTTGTGCAGGCAGTGGGC
GTGGGGTAAGGCTTCCTGATGCCCCCTGTCCCTGCCCAGAACCTGATGGC
CCTCATTAGTCCTTGGCTCTTATCTTGAAGCACAGGCGCTGACAGCCGTC
CCAGCCCTTCTGTCTGCGGGCCTGAACCAAACGGTGCCATGGGGAACTGT
CTGCACAGGGTGAGTATGGGGCCAGGCCCCAGAGTCCCTTATCCCTATGC
CCCTCATTTCCCGTGCTGTTTGCCCTCAGTCTTTATATCTCTTCCCTTTCT
CCTCATCTTTTCTCCCTTCCCTGCTTTTTTCTCTTCCCTTCAAAGTCTTTTTCT
TCTCTCCTTCCCTATGCTAGCCTCCTAGCTCCCTCTTGTGTCCCTCCCTTTGC
CTTTGAGTCAGTTCATCCTGGTCTCTTGGTGCCTTTTCTTCTGACCTTGC
ACTGCTCCTCCAGCCCCAGCTGCCCTGGCTTCCCAGGACTGTTCCCTGCTC
CGGCTCTTCAGGCTCCCTGCTTTGTCTTTTCCACTGTCCGCACTGCATCTG
ACTCCTGCAGAGACCTTGTTCTCCCACCCGACCTTCCCTCTCTGTCCCTCCCT
CCCACCTGCCCTCAATTCCCAGGAGACTCTTCCGGTGTAACCTCTGATGGC
CTCCTCTGGGTATGTCTCCAGGCGGAGCTCTCCCCCTCAACTGAGAACTC
AAGTCAGCTGGACTTCGAAGATGTATGGAATTCTTCCCTATGGTGTGAATGAT
TCCTTCCAGATGGAGACTATGGTGCCAACCTGGAAGCAGCTGCCCCCTGC
CACTCCTGTAACCTGCTGGATGACTCTGCACTGCCCTTCTTCATCCTCACCA
GTGTCCTGGGTATCCTAGCTAGCAGCACTGTCCTCTTCATGCTTTTCAGACC
TCTCTTCCGCTGGCAGCTCTGCCCTGGCTGGCCTGTCCTGGCACAGCTGG
CTGTGGGCAGTGCCCTCTTCAGCATTGTGGTGCCCGTCTTGGCCCCAGGG
CTAGGTAGCACTCGCAGCTCTGCCCTGTGTAGCCTGGGCTACTGTGTCTGG
TATGGCTCAGCCTTTGCCCAGGCTTTGCTGCTAGGGTGCCATGCCTCCCTG
GGCCACAGACTGGGTGCAGGCCAGGTCCCAGGCCTCACCTGGGGCTCAC
TGTGGGAATTTGGGGAGTGGCTGCCCTACTGACACTGCCTGTCACCCTGGC
CAGTGGTGTCTTCTGGTGGACTCTGCACCCTGATATACAGCACGGAGCTGAA
GGCTTTGCAGGCCACACACTGTAGCCTGTCTTGCCATCTTTGTCTTGTTG
CCATTGGGTTTGTGGAGCCAAGGGGCTGAAGAAGGCATTGGGTATGGG
GCCAGGCCCTGGATGAATATCCTGTGGGCCTGGTTTATTTTCTGGTGGCC
TCATGGGGTGGTTCTAGGACTGGATTTCTGGTGGAGGTCCAAGCTGTTGCT
GTTGTCAACATGTCTGGCCCAGCAGGCTCTGGACCTGCTGCTGAACCTGGC
AGAAGCCCTGGCAATTTTGCCTGTGTGGCTACGCCCTGCTCCTCGCCCT
ATTCTGCCACCAGGCCACCCGCACCCTCTTGCCCTCTCTGCCCTCCCTGA
AGGATGGTCTTCTCATCTGGACACCCTTGAAGCAAATCCTAGTTCTCTTCC
CACCTGTCAACCTGAATTAAGTCTACACTGCCTTTGTGAAn
```

**Selected Module Sets:**

**Left Module Count:** 3  
**Spacer Nucleotide Count:** 5,6,7  
**Right Module Count:** 3  
**Ignore Asp Overlap:**False

The results below are zinc finger arrays that can be constructed using CoDA. Note that other

methods (including modular assembly and OPEN) can also potentially be used to target the input sequence of interest.”

Sort By:   Hide intron splice sites

ZFN-unknown-SP-5-1  
 1038 tGCCCTCTTCAGCAT**TGTGGTGCC**c 1062  
 1038 a**CGGGAGAAG**TCGTAACACCACGGg 1062

| FINGER   | HELIX   | TRIPLET    | REFERENCE NUMBER | SOURCE |
|----------|---------|------------|------------------|--------|
| Left F1  | SPSKLVR | <b>GGC</b> | -                | CoDA   |
| Left F2  | RQDNLGR | <b>GAG</b> | -                | CoDA   |
| Left F3  | QRNNLGR | <b>GAA</b> | -                | CoDA   |
| Right F1 | SKKSLTR | <b>GCC</b> | -                | CoDA   |
| Right F2 | EAHHLR  | <b>GGT</b> | -                | CoDA   |
| Right F3 | QPHGLAH | <b>TGT</b> | -                | CoDA   |

ZF DNA Sequence

ZFN-unknown-SP-7-1  
 1337 tGCAGGCCACACACACT**GTAGCCTGT**c 1363  
 1337 a**CGTCCGGTG**TGTGTGACATCGGACAg 1363
