# Supplementary material for: Targeting wild-type Erythrocyte receptors for Plasmodium falciparum and vivax Merozoites by Zinc Finger Nucleases In- silico: Towards a Genetic Vaccine against Malaria
Source: PubMed Central journal article supplement (PMC3500210; doi:10.1186/1479-0556-10-8), 2012-08-31
Supplement: 1479-0556-10-8-S4.pdf [file 1479-0556-10-8-S4.pdf]

**Zinc Finger Site Type:** Nuclease

**Zinc Finger Engineering Method:** CoDA

**Sequence Name :** GI|224589816:C145061904-

145030456\_HOMO\_SAPIENS\_CHROMOSOME\_4,\_GRCH37.P2\_PRIMARY\_REFERENCE\_ASSEMBLY

**Sequence Length:**31451

**Nucleotide Sequence**

```
:nGCAGGAAGGTGGGCCTGGAAGATAACAGCTAGCAGGCTAAGGTCAGACA
CTGACACTTGCAGTTGTCTTTGGTAGTTTTTTTGCCTAACTTCAGGAACCA
GCTCATGATCTCAGGATGTATGGAAAATAATCTTTGTATTACTATTGTCAGG
TAAGTGATTTTATTTTCATCTTGGTTCTGTTATATTGGGTATGAGATCATAGAA
TAAAATATGAACTACCCTATTTTAGTTCTATCTTATTTAAATCAATAAATGAGT
AGTATTTCTCTTCCAGTCTGGTGGATGGATTTTACTGGAAGTCTAGCTACCA
ATGTGGGGGAAATGGCACAAGGGAGCCCAGTATTTATGGCCAAATCCAGTT
TTCTAGTATGAGAAGCTTACTTCAATTCTAAGTCTAGCTAGAATTTAAATAAT
TTTATCAAATGCTATGAGAAATACCTCTCTGTGAATAAATGTATTGCTTTGTT
GAGTTATAAGGAGATTCATTTCCAAACTAAAGAGTTATTAACGAAGATGTTG
GTAGCTATATGGCTTTTAGTTTTCAAAGGTATAATTTCTATTTCTGCCAAA
TGGCGAGAAGCCAAAAGCATGAACACTGAAACCGTGGGGAGTTGTTGCGCTT
CTCTGTGGGTCCACTTAAAGTGTACATAGGAAGAAAAAACAACAAAACA
ACTCTTACTGGCTTAGGTATCCTGTGAATTTTAGGAGAAATTTAAATCCATTA
AAATAAAGAAATATCATAGGGTTATTATTAATTGTATTAATTCAATAATTTGA
ATTTAACTTAGTTTAAATTTAATTATTAATTTAGTGTCTTAAATTAACATGATTT
TGGCCTCTTTCTGAGAATATTATAGTTAAACATCCTCTCAAGTGCAGTGCTTA
TGTGTTAGCAATACTAGTGCCCAGCACACAGCGGGCAGGCAGTTGCTTGAA
ACATTCTGAGTCTATTAGACATTGCTGTATCCCAAGTGAGAGCAAGTATCAA
GGAGCTACTGAGCACTCTGTAGCACACAGGGAGGAGAGATCAGCATTTTCT
AAGATACCCTAGGGGAGGATAAAATAGTGCAATAGTTAAGAGCACAGGCAT
GAGGAACAGACAGAAGTGGGTTCAAATCTACTTTTACTTCTCAAGGCTGGG
GAACATTAAGGCAAATTATGTGCCACATTTTTATGTGTCCTCGTCTTTAAA
TGCAGGCAGTGTTGGTACTTACCTCATAATAATTGCATAAAGATTAACAAA
TATTTAATGGAATACACTTACTGATGCCTGAAACAAAGTAAAATGTTAAGATT
ACTATGCATTTTCTGTGATTAGAATTAATCATGATTAATAAAGTATTAATAA
TATATTATTAATAAAGCAGTAGCTATCAATAGTTACAGACTAGGGAACAAAC
CTACGTATGTGATTGGTATTCTGAAAAGTCAGAGAGAAAAGAAAATTACA
GAAAGAAAACAGAAAACAAACATAGCTACTCTAATTTTTTAAGCAGAAAAGTA
TGAAAACATTTAGTTTGAAGAAAAGAAAACAATGAAAGGGATGTAGTGTA
TATTTGTATATATATTCATATATTTGAAGTGCTATTACACAGAAAAAAGATGT
ATTCTTTGTGTTGCTCCATGGGGCAAACCAAAGTGGATGTAAGTCAAGCAA
ATTAGACACTGCATACTCTACTGGGGGTGTGCCAGCATTTGGGAAAACCTC
TGTGTGACTTACAAGTGCCCAAATTTGGAAAGGGTTCCTGGCAAAGAAAT
GATTTTTTTTTTAAATTTCTACAACACTACACAAGCAGATAGTGTATTAAGCCTT
AAATGGCACTTGGTCACTGGGGCAAGATGACCCTGAAAGCTACAATGGTCT
CCAGTACCCAAGCTGTTATCATCTTTGTAGCTTCAGAAACCCTCCAAGGAAA
CTCTCTTGATGTGGCTACTTTATAGTATAACAGAAAGGTGTAAGATCAAGTTT
TTCCCCATACTGATTAGCTGAAGAGTAAACATGGTGAAGTCTTTTTCTTTTT
```

CTTTTATGTTGCTATAAAAAAAAAAAGATGATTGCCTTGCTTTCTCCAGGAATCT  
TAAGAATAAAGCCAATATTTCTAATTCTAACTTACCAGAGATCTCCTTCCAA  
ATGGAGAATCCATTTTTTCTAATATGACTTGATTCCCAGTCCCTGAATTCCTG  
CACTCATTTGATGATTCAGTCATTACATGTCAGATTGTGAACCAGACACTGA  
GCCACAGCAGGAAGAAAAATGGGCTCCCATGGAGGATACACGGAGGGTA  
GGCGCAGTGGATGATGGGAGGGAACGCAGATAATAAATGGAACAACAATA  
TCTTATTAATAAAGATAAAAAACAGTCAAACTAATAACAAGCATATAAAACC  
AGGTAAGATGATAAACATGAATGCCGAAAGCTGCTTAAGAAAAGGGTAGCA  
GGGAGTTATTTTCTGAGTAGATGACATTTATGCTAAATGTGGAACAAGGAGA  
CGGAGCCAACCCTGAAAATTCTGGGAAAAGAGGACAGAAGGCAGAGGGAA  
GAGCAAGAGCAAAAATTCTGAAACAGCAGGTAAGTTAGTGTTTTCAAGGAAA  
AGCTGGAGCTTTTATCTGAAAATCAGATTCTGAAGCTAAGAACCAATTTGAA  
AATACAATAAATATCACTTCGACTAGGAAATTATGGCATAAACCAGGAGTC  
TCCAAAAGCTTTTTGTGTTTACTTAAAAATTCATACAAAATTTGCATTCTAGGT  
CATAATATACTAATTTAATTGGAGGAAACAAAGGCACTGGTATGATATCATCA  
TGCTACTTTTATTCATCCGTGTATCCCAGAATCTAGCACAGTTCCCGATTG  
GTATTTATAGTAGCATATTGGTTGAATAAGCAAGGAAGGAGGTGAAGGGAG  
GGAGAAGGAGAGAGAAGCAGAGAGGGAGAGGAAGGAAGAAAAGAAAAGGAA  
AAAGGGAAGGAAGAAGAGAGAGGAGGGAGAGAGGGAGGGAGGCAAGAAGG  
GAGAAGAGAGAAGGGAAGGGAAGAGACAGGAGGAAGGGGAGGAGGAAAG  
GAAAGAGGAAATATTTGTTTTCATCTGGTTAGACACAGTGAGTGCTCCGCAT  
AGACAGATCATTATTACCCTGTGCATCTGACTCATACCCTGCAAGTACATC  
AGTCTGAGAAGCACATGTTAAGTGAAGAAACAAGGCATCTCTTTTTTTTTTTT  
TTTTCAGGGATCCAAGAAGAGAGCCTTGCTAGCTGCTATTTAATTGGCACAG  
GAAAGAGTTACAGGAAGTGTATGCCAGGGAATACATGACTATAAATCTTTA  
AAAGCAAACCTGTGTCTTCGCTTATGTGTCCCACACATTGTCAGCCACATA  
GTAGGCAGTCAATATCAACTACTCAAATGACAAATGACAAATGACCAGAAT  
TCTGCGGCAGACTAGTTTAGCCATGAAAAATCATTAAACACCCGTGGGCCTC  
AGTTTTCTTGTCCTATTCAATAAAGCGCCGAGTAGATGGTATCTACAAGCA  
TTTTTCAACTGTAAACCCCAATGAATCCCCAAAATTCAGCCTGAGATGAGCT  
GGACTAGTTGCCAAACCTATAAATATCTTTAGCATGGTGTGAAATAGGGTTT  
TTAGAAAGAAACAGACACCCACTGTGAACTCCTTTGCAGAAAAGGTCTGAAT  
AGAGGGGAAAGTAGGGATGGTATCTCAAACCTACTTTGTAGTGATTTTAAAT  
TAGGAAATTTAGCTTCACATTCTTGTGATAAATTTCTTTTACCTTGGTTTCTA  
GAAGATTATTCAAACATCTGTGAGACTATTTGAGAAGTATACTTTTGGGGA  
ATTTCCCAAGTTATCTTTATAGATTATATTTTACATCAACTGCAATGTAAT  
ATCTTTTACTCAAAAAAACCCAATCCTACTTACATGGTGCTGACAAAATCAG  
GCTGGACCTACATTTTTACATCATAGATTTCCAGCCATTATTATCATATCCAC  
ATCTTTAGTAAGTACCTATCTGTGTAGTTTTCTGTGATAAATGAACTAACTA  
AACTAAAGCAAAAATGTTGAAAAAAATTCAGGTTTATCTCTGAGTGTTGG  
GATTGCAAGGTTTTTTTTTCTCATTTTAAATACTTTCTAAATTTTCTGCAAAGA  
GAACCATATAATCTAATCAGGACAAGTTTTAATATATTTTAAAAGTAAACCG  
AACAAACACAATCTCTGCTTTCTAAGAAGTCTTTAATTTTTGTACGTTGGTCA  
TAGACTATGACTATACAATTTATTTGTGATATGTATTAAGAATTTCTGTCTAAC  
CCAAATTATTATATGTAAGCACGGGAAAAATGATGTCATCTTTGTTTGTAGTG  
TACAAAGTTCTATAACAGCTATTTGATCAACTTTGGTATTTCCATCCCTAGA

TTTATATACAGCAGGTTAGGTTCCATACAGAGGCAGGTTCTGAATAATAATA  
ACCAACACTGATAATAGCACTTACTTTGTGCCGTGCACTGTTCTAAGCAATTT  
ACATACACTTAATTTTTAAAATTGTAGTAAAATACACATAATATAAATTTACCA  
TTTGAACCATTTTAAAGTGTACAATGGGTAGCATTTAATGCAGTCAAAATGAT  
GCACACCCATCACCATTATGTAGCTCCAGAACATTTTCATCACTCCAAAAGG  
AACCTCTTACCATTAGCAGCCACTTCCAATTCCTCCAGCCCCTGGAAACC  
ACTAATTTGTTTTCTACATCTACAGATATACCCATTGTAGATATTTTCATATAAA  
TGGAATCATATAATAGGTAGCCTTTTGTGTATGTCCTCTTTCACTTAAAATAA  
TGTGTTTAAAGTTCATCCATATTGTAGCATGTATCAGTATTTCAATCCTTTTAT  
AATTGTGTTGGTATATCTCATTTTGTTTATCCACCCATCATTGATTAATAATTT  
GGGTTGGCATATCACATTTTGCTTATCGATCCATCATTGATTAATAATTTGTG  
TTGTTTCCACCTTTTGGCTATTGTGAATAGTGCTGCTATAAATATTCCTGTAC  
TAGTTTTGTTGAACCCACTTTTAATACTCAAAGATGTATAGGGGTAGAATTG  
CTGGGTCATAGTAATTTTATGTTTAACTTACTAAGGAACTGCTCAACTCTTTT  
CCACAGGAGCTGCACCTTTTGACCTTTTACCAGGGTGTATGAGGTGCCAA  
TTTCTCCACAATCTTGCCAGAAATTGACTTTTTTCATTTTTTTAATTATAGCCA  
TTTCAGAGGGTATGAAATGGTTTTTCACTGTGGTTTCTTGCATTTTCCTAATA  
ACTAATGACGCTGAGAATCTTCTCATGTAATTGTTGGTAACTGCATTTTGCAT  
ATCTTTGGAGAAATGTTGGTACTAGTCCTTACCATTTTTCAATCTATTTTT  
CTTTTTGTGTTGCTAAGTTGTAAGAGTTCTTTCTATGTTCTGGATAAAGAGTC  
TTATCAGATACTATTTGCAAATCTTTTCTTCAATCTGTAGATTTTTGTTTTT  
ACTTTTGATAGTGCCTTTGATGCACAAATGTTTTTCATTTTCAAGTCCAATTT  
ATTTTTTTTTCTTTTGCTGCTTACGCTTTTGATATCATATCTAAAATAAATTGC  
CAAATTTAAAGTCATAAAAATTTCTCCCTATGTTTTCTTCTAAGAGTTTTGTAT  
TTCTTCTCTTATATTTAGATCTTTGGTTTATTATCAGTTAATTTTTCTATATGAT  
GTATGATAAGAGTCCACCTTTATTATTTTGCAGCTGTCCCAGCACCATTTGTT  
GAAGAGACTATCCTTTGCCATTGAATGGTCTTGACACCCTTCTTGAAAGTT  
AATTGGCCATGGATATATGAGTTTATTTCTGGAGTCTCAATTCTATCCTAAGA  
ATATGTCTGTTCTTGGGGCAAATCACACAGTTTTTATTGCTGTTACTTGGTT  
ATACGTTTTTAATTCATGAAGTGTGATTCACCAAACCTTTGTTCTTCAAGATTG  
TTTTGCCTATTTAGATCCCTAACAATTTCATAGAAATTTAGGATTAGGTTTTT  
CATTCTTGCAAAAAATAATTATGTGCATTTTAACTTAACTGTTCAATAACTC  
TATAAGGTAGAGACTAATCCATGTATAATGATGGAACAAAAATATAGAGATTA  
AGTAAATTTTGAAGGTCTCAGGTAGTTGCTAGAGGAATTAGTTTGAAGCCTA  
GGCAGTTCCACTGCAGAATCTGTGCACTTAGAGAATATGTCATGTTGCCTGT  
ACCATACCTAGTGATGTTCCAGGATTGGCTCCTTTACTCTTACAACATTGTCA  
CTCAGTGTTCTGCCTGTGCTTTACCAAGCTGAAGACTTTAATGAAGGTTGA  
CGGTCTGTCTTCTCACGTGGTGCAGCTAAGGAACTCTAACTGTGTGGCTG  
TTATGTTAGCCTTTTGTCTCTTTTATATGGGCTATAGAAAATGTTTTTAAATC  
CTGGAGGCCTCCTTTTGTATGTTATCACTTATTTCCAGTCATCACTATATTTT  
TAAAAGCCAAAATAGAAGGAAATAAATACAAAACATAAAACATGAATAGTACA  
GCTATTTGAGGCAACTGAGAATAGAGATCATGGCACTGAAATTGCATTTTGC  
TAGGAAAAAGACCACAAAAGTTCTCCCCTTGCTACCTTTCTGAACTATTCT  
GCTAGATTCAGACTTCAAAAACATTGTATCAGGAAATACAGAAATGTTCTTTC  
AAAATGAGTGTATGGGAATGTGGGAATGCCTAATAAAATCTGTCCTCATTGA  
TTCGTTAGCAAAAATCATATAAATCAATACCTTGTGATTGCAAGCAGATATAT

TTCAGATCCTTTCTGTGTTTGTGTTTTTGGCTTTCTTGATCTATCACAATTGGAG  
AAAACCTAAATTTCTCAATGGTATTGTATTTTTGCCAATTTCTTATTCTGCTT  
TATGTTTCTCGTTGCTATATTATTGGGCTATAATGGTCCATAATTACTTAAGA  
ATCACTGTGAAATATATTGCTTAATGACACAAGTAAATCTTTTTCAATTGTTTGT  
AATGCTTTGCTCTTAATTCTACTTTGCCTAAGATTAATACGGTATTCTGTT  
TAGTTTTATATGTATTTATTTATTTATTTGAAGATGGAGTCTCGTTCTGTCCG  
CCAGGCTGGAGTGCAGTTGCATGATCTCGGCTCACTGCAACCTCTGCCTCC  
CGGGTTCAAGCAATTCTCCTGCCTCAGCCTCCCAAGTAGCTGAGAATACAG  
GCGCACACCATCGCGCCAGTTAATTTTTGTATTTAGTAGAGACGGGGTT  
TCACTGTGTTGCCCATGCTGGTCTCCAACCTCTGAGCTCAGGCAATCCACC  
TGCTCGGCCTCCCAAAGTGTGGGATTACAGGCATGAGCCATTGCACCAG  
TCCTAACCTATCTCTTTGACTCAATCTAAAAGTTTCTGTCTTTAATACAAA  
CCACAATCCATATGCATTCATTAATTCACAACCTGACATTTAGTATCTTATTTCT  
GTTATCCTATTTTCATATTTTATGATTCCTTGTTTCTGCTCTTTTGATATATAAAT  
TATGTTTTATTTGCCCTTATCCTTTTCATGTGTTTCTAAAGTATATAGCCTACGT  
GTAATTGTCCATTAGCTAACTTTATGTTTTTGAAGCATTCTCTCTCAGAAT  
TCCCATTTTAGTGGTGCAGCACACATAGAAAGTCTAAGTGCTTTCTGGAGCT  
AGATAAGCTGGATAAAGGTGTGCATGAGCCACTGGTCAATGGCTTGTGCAG  
GCGGTGAGTGCATTTCTGGTATTTTCATATGCTATTGATCTGGCAGCCAGGTA  
TTCAGATAGGGTATAACCAGGTTTCATCAGGCTCAAACATAATCAAGTATTA  
TTGAGACATAGTTAATGTGCACTACAACCTCACAGCACACAGGCTCACACACA  
CACTTGTCTGAAATAAAATTCACAAAATAATACCTTCCCTTATTCTGTGTGA  
TGACTTTGATATATTCTCTCCTGTTTTATACAACCTTAATTTTTTTAGAGAAA  
AGATTTTGCTCTGTGGCCTAAGCTGGACTGCAACGGCACAGTCATAGCTTA  
CTTCAGTCTTGAACCTGCTGGATTCAAGTGATTCTCCAGCTTCTGCCTCTCAA  
GTAGCTGAGACTTCAGGTGTGCTCAACCACACCTGACTAATTTTTTGGTTAT  
TTAATTTGTAAATATGGGGTCTTGCTATGTTGCCCAGGCTGGTCTCGAGCTC  
CTGGCCTCAAGCGATCCTCCTGCCTTGGCCTCCCAAAGCACTGGGGTTACA  
GGCATGAGCCACCACACCTAGAATACAACCTTAATTTTTTAGTGCCAGTGACA  
ACCCACTGGACTGATTTTCATAACCCATTAGTAGAGGAATGCACCATCTTGAC  
TGAAGGTTGGAATTTTCTCAGGGAATCTATGTAGCACTGATGATTGGGTTTC  
ATATCCAGAGATTCTAGTTATGCTAATACAGAGGCCAAGCAAACCTATAGCCT  
GTGAATGGCCGGCCCCCTGGTTTTGTATACCTTACAAGTTACAAATGATTTT  
TACTTTTTTAAGTGCTTAAAAAAACCAAATAGGCCGGGTGCAGTGGTTCAA  
GCCTGTAATCCCATCACTTTGGGAGGCTGAGGCAGGCGGATCACGAGGTC  
AGAGGATCGAGATCGTCCTGGCTAACACAGTGAAACCCCATCTCTCCTAAA  
AATACAAAAAATTAGCCAGGCTTGGTGGTGGGCGCCTGTAGTCCTAGCTAC  
TTGGGAGGCTGAGGCAGGAGAATGGAGTGAACCCGGGAGGCAGAGCTTGC  
AGTGAGCCAAGATCATGCCACTTCACTCTAGCCTGGGCAACAGAGCAAGCC  
TCTGTCTCAAAGAAAAAAAAAAAAAGAAAGACACAAAAAAAATCAAATAATAAT  
AATAATATGTGAATATTATATGAAATTCAAATTCTACTGCCACAAATCATTAT  
TGGAACATAGTCATACTCATTTATTTATGCTTTGGTTTACATATTGTCTGTAG  
CTGCTTTTGCACAGTGACAGAGTTGAATATTTGTAATAGATGGTCCACAAAG  
CCTAAAGTAGTTGTGGCCACAAATCCTAAAGTAGTTACTCTCTCTCCCTTTA  
CATAGGAAGTTTACTAATACTTGTGCTAAGGGATCTCAACAGACAATCTGAA  
AACTTAAGTTTTAGACTAAAGATTTCCAATCTAAATTCCTGTGGAGCTTTCT

GAAGCTGCCAGGTGGAGATGGGAACAGGTTGTGAGGCTGCAGGCCAAACA  
CTCAGGCCAGCTTCCACCAAGCAGTTCAACTCTGTCTGTTTCACACACTGAT  
GAGCTTATCCTTGGAAAGTGATTAAGTAAAATTAATGCGAATTGAGGGAG  
GAAGTGAGGGAGACTGTGGCTCTAAAACAAAACCCTAAGAAACACCAACAT  
TTAAGATGGCAAATGATGTTATTTCTAAAGTCGTTCAGGCTAATATCACATAC  
TATAGCTGTTCACTTTATAGATAAAGGTGACACTACAACCATAGAAAATGTAA  
GAGTGGACCTCGAAACTCAGGAAGATGAAGTTTACATATATTAATCTATATTA  
CCAACTGGAGCAGTTGTTCTCACTGCTGGCCGCACATCAGAATCCAATTCCT  
GGGATATCACAGATGATTCTACCATGCAGTCAAGGATGAGAACAACTAGG  
TTCATTTCTGCAATTTTTTTATTGTTCAACCAGTGAAAAGGAAGTACCAGTGG  
TGTGAGAACTTTGGGATAAAGTTTTTTGTTTTCAATTAATAATTTTTCATCCAG  
CCCAACTTCCTTAAGCCCAAATTTAATGTGTGTGAAGTTCAGCTACAGAAAT  
ACCAAACCTTAGACTAAAGCGGACACAGGTAAAATATGTGAAATCCTCTTTT  
GTTCTGAGGATTCTTTAGTAGGCAGGAGTGACCAGATAGGAATATGCTTGG  
CTGGAAAAATTAAGATTCAAGTTAACAACTGTTAATAACCAGGACCATCTG  
CTCTTCCGTAATGTGGATTTGCCACTGCAGGTCACCCTACAATGCTATGTTA  
GAGGTACAACACTCTTACCCTCAGGCTATAAACAAGGTGAATTATTATCTTTA  
TATCTCTTCATTTAGCCCTGATTTGCTGAAGTGAAGGCTCGCTTGAGAGTTG  
GTTGCATTATAATTTGGTGAGAATTTAATCTCTCAATGACAACCTTACTTGATT  
CCCTCATTCTCTTTCTGCTACATAGATCACAGTAGACCTTGGCAGACAGTTC  
TGTAGTTACATAGGTCTGAATTCAAAATCCAGGTCTGCCACTTGGTGGCTGT  
GTGAACTTAAGCAAGTCAGGCAATGCTTCTGATGTTTTTTTCTCCTCCACA  
AAGAATAATTAACATATAACAATAGGGTCTCAGCTAGTTGTTTTAAAATGGT  
TAGAGAGATGTGTGGAATGAAGTAAGTGTGCAGTAAGTGTTAACTACAAATA  
TTATTATCTTAGACATACAGATTTCCATGATTCATGAATGGTGAAGCATCTTA  
GAAGACATCCATTCCAGGCCAGGCATGGTGGTGTGCACCTATAGTCCAAGT  
TGCTCAGTAGAATGAGGCAGGAGAATTGCTTGAGCCTAGGAGTTTGAGGCT  
AGTATGGGCAATATGGTGAAACCCTATCTCAAGAAAAAAGCAAAACATTTTT  
TAAAGTTTAAAAGAGAGACATCTGTTCCACTACTCTCATCTTAGAGGCCAT  
AAAAGTGGGCTCAGATAATTTAGAGACTTGACACAGATCCCCCAACCATTT  
GGTGGCAAAGCCAGGAAGAGAAGTCTGCTCTCCTTTCCACTGGGACAGTG  
GAAGAAATTCGTCTTGATTTCCATCTGTCCAGGCTGAAGAATGTGCACTGGC  
TGGAATGACAGACTGACCGACTTTTTTTCTCCACCTCTGCTGTCTCAGCAAT  
GGTTTGGGACAGTGTGGATGACCAGAAGCTGGATAGTACAGAGCCAGGCT  
AAAGAGTTCAGGCTTCTGAAGGGAAGCTGCAGTCCTCCTAGGCCACAACA  
CCTTCGAGATAGAATACATAAAGCACCTTCTCTACCAAGTTAGGAAAGGAA  
GAAGTGTGACCAATTAGCTGTATGGGGACTGCCAAAGCATGCCAGTCTGAA  
GATGAGCAGAACTGGCTCATTCCATTTGGCACCTAGCACACTAACTGCATC  
CGTTAATAGGCCATGCTTTTCTCCAGAGCCATTGGCTGAAGAGATCAAATAA  
AAAGTATTGAGAATAGGCTACCCAAAACAGTAGGCTCAGATGCTATCACACA  
AAGCACTTTATCCTTAAGTTCAATTTTTCTAAATTGTAGTTGGCTGCTTTGGC  
TTAATAAAAAGTCCAAAAAAGAAAAACGAATGGCCACAGACAGTATGGGTA  
TCTAACTATATTATCACAACTTGACCAAGATTGAACTTGCCAATCCTTTGGTT  
CAAGAGCCAAACAAAATCGTTCCCTTAAAATATTGCTTCATGGGAACAGTCT  
TCTTCAAACATCTTTTAGCACAGGCAAGATTCCCATTATACATTAATTCTGT  
TCAAGACAATGAGATTGGGCAGAAAAGGCATTGAGTTGGAAGTCAATGGAT

ATGAGTTTTTATCCCAGTTTTACCACAAATTAGCTGAGCATAACTTCCACAGA  
TGCATTTATCAAGTAGTTTTCATGGTCATTGCAATGCCAAAAAACTGTAGCAT  
TTAGAAAATTTAGTTTTAGACTTTGGAAACTATTTAAGGCATTTTCATATGAAG  
GGTGTGTCCTTGTGAGAGTTTGCTTATGCAAGATAAAGGCTTCTTTCAGCTGC  
AAGTCAGGAGCGAACCAAAACCTCAAAGCAGCAGCTGCATGAGCTGACTTTA  
TCACATCTTGACAAGAGCTCAGCCACTGGAAGTTTTGGCATAACAGCGAAACT  
GAAGCGTACTTATACAATATCACATTTTTATTTTTATTGTTTCTAATAGCATTCC  
AGGTTAGAAATGTCAATTATTTGGGAAAGCTGAGGGTCTGGTAGATAAAGCA  
TGCAGCAGAGAGCTAGGAGGCTGGCTATTTCCAGTCGTTATCCTAACATGT  
CTTGGGCCCCCAAGTCACCCACCTCCATGGTACAATGGGAACTGTGGCAG  
AAGTCCACGCTCTCTCCCCAACACATGGGGATAAGAGACAAGAGAGGTGA  
AATGTTCTGGAACATATCCGATGTTATACAAGTATAAGCTGTGAGATGATCC  
AAACGCAAATATTGAATATTTCAATTTCTAGAAAGTATACCAATTCATTCCAC  
CCTTCTCAAACCTAAATTACAGAATTCATTCAGGTCACACAGATTTACTTTG  
TACTAAGTACCATAGCAAATGCCATTTAGTGCCTGAAAACCTGAAAAACATA  
AATTTAAAGTAGGAGTTTGAGGCCTCACTAATATGACAAAACATACCTTTATA  
TTTTATTTTGCAGTAATTTGCCACTTAATCATTAAACTCTTATCAATCTGAGAG  
ATTTGCCAACACTTGCCTGCTAGGTGACCTAAGCCTCCACATCAATGCATGT  
TATACTCCCCTTTCTCCATATGTTAGGCCCATGCTATTTCTTTATCCCTCCTC  
CTCTGCATCTTCACCTAAAACCTCTGCCCATCCTTCAGGGTTCATCCAGTGAT  
TCATTTGCAAGCAGGCATGGGGTAAGGTCTTCAGAGTATGTTTCTCAGAGG  
CCCATGCAGCTAAGAAAATGTGCAGTGTGGCACAAGGTCTGTCTATTCT  
GGGTAGCCAGATGCTGGACACATCTTTCATAACACCACAAGGTAATATACT  
TCACTTGGAGAGAGAGGTTGAAATTTTGCAGGTATAGACTGGATGTGTTCT  
GCCAGAAGATGTGAAGGGATTAAGAAACTGACTCTCATCTCCGTATTGCTAG  
AGCAAAACATAATTTCTCATAGTGGCTATAGTATAAGGACACTGAGGGGTAA  
GAGATATAATCTAAGTAATACAATAAATTAGTGTGGAAAATCATCAAATGA  
AGACTACATGGTTTTTACTAAAATTCTAGCTTTTAGGATGTCCAGGGAGCTC  
AGGAATTTAGCTGTCCTTTTTTGTATGTACAATATGCCCAATGCTTGCTGAC  
TAATGTAATAAACATTAGAGAAATCTTGCTGACAAGATCTCAACCAGTCAG  
CGAGATCCGGAAGGTGAGACTAATATTGAGGGTCAGCAGAATTAAGTCTCA  
GTTCTGCTGCTTACCAGATATGCTGATCTGAGCTAGTCATTTAATTTTTATGA  
GACCAAATGTCTATCTGTAAAGTCGGCAATTTGGATTAGATGTGCTGCAAGT  
GGTTTTCTAGCTTAAATGTACCTTCTGAATTCAACAGGACAATACTTAAACTG  
ACCTTTAATCTAGGAATGACACAAGTAGATTTTTGAAAGCTACTTTAGCTACA  
GAAAGCTGAGAGCACCAAAGGCAAAGAGATAAAAATAACAGGAGAGCCTTC  
CCTTAATCCAGTCCCTAAGCAGTTTTGGCAAACCTAAAGTTTGTGTTCAATG  
GTTACGAGTTTGCTTCAATGCTTTCTACCCAGTTTACTGAACTAAATAGTATA  
TAGCTATAGTAAAAGTCCTATTCAAAACCAGCTTCTCACAGATATTTTGCA  
GCTTTGCAGAATTGAATATGTCCACAGACGTCTATTAGCTGGTTAGGGTCTT  
AGGAATCTAGGAGAGCCAAGTAGTTGTGTGAGCTGTTGTTATCAAATGTAGT  
TTTGAACATTCTTGGTGATTTTAAGGGATCATATTGTGGAATTTGGTTTCT  
TACCTTGAATTTTGAATGAAGCTTTAGAATTTGAGGATGTTTCTTTGGTTTCT  
CCTTCCAGGTAAGTGATTTTTTTTTTTTTCAACCAGATGCTGGTTTATTTAATT  
TGAAGGTATTGATGAAATCTTTAAATTGCCCCCATGTGATTCTACTCTGGAA  
TAACTACGAAATTATTTAAAAGTTAATTAATACAAGAAAATATGAAAACCTCATT

TTTATGGGAGCTATTGTTCCCTTCAAGATGACACTGTTTTGTAACTATAGACT  
TCCAGTAACAAGCCTCTGTGCCTTCTTCTTACCACTAAGCATGCATGGGTAT  
TAATTCCTACTGAAAGACTTATGCTATCTTTTTTCCAGAAATGGAAGAAAAT  
GAACTATGAAAAAGGTCATTTTATAGGTGAGCTACCACTATGAGATTGTTGA  
GGAAATGATATAAAAAACAATTTTATCAAATTATCTTTAGGGCATTATATGT  
TTATTTTCTTACTATGTTGACTTAGGTGACTATAAGAAGTTGTATCAGAGCAA  
CTGATTCTGGTGAATTAAGCAAGTATTTCTAAGAACATAAGTGGCAACTTTC  
AGTCTCAAATCAATTTGGCCACCAATCAGTTTTTGTAAAGGTACAAATAGGA  
CATAACATGCTCAGATGGGACTTGGATAAAGTGTATACAATTTTACATCGAG  
GAAATTGTGTCAATGTGTTACCTTCAATGTTAGAAATTCCCAAGTTCTGACAA  
TAGTTCAGAGCCTTGTTAAAAGCCAGAGTGGAGGCATGTAGATCCAGCTGG  
AAAGAGAGGCATTATGGTCTAACTTAGGACAAATTTAAAGCCAGTGTTAGG  
GTCTGAGTCCAGCTTTGTAACTTGAGTACAGTGTTTGATCTCTGGGGTTTT  
AGCCTTCACTTCAGAACAAAATTTCCACCAAGTGCTCTTTTACTGTGAGGAG  
TAGCTGTTGAAGAAGAAGAAGTCTACTTATTTGCTAGAGTGTTACAATTGTT  
TTGATAAAGCTCAAACCTTATCTAAATAAGCTCTCTCTCCCTAAGCATGTTTT  
CATTTTTATAAAAAAGTTACATATACTTTGCTTATAAATTTAAAATACTTTTAC  
CTCCTCTGACTTCATTTAAAATTTAAAATAATTAAGTGCCAATTTTAAAGAT  
GTTAGCTCCCATTATTGGTTCCTTGCCATATTCTTTTGACAACCTGCTGTAAT  
TTTCTGCCCCCTTTAAAGCCTCAGGCTATAGGCCTTCTCCACCAAAGGAATA  
TTAAGAAGTGATAAGGACCTTCTGTGAGCAGAAGTGGCTTGTTTGCAAAGG  
GACTGCTTATCTTGGCCACTCTTGAACACAAGATGGGACCCTCTACTGCAA  
GCTCTGGCATGTTTTTTTTTCCCCTAAGTTATCCTCCATACTACTGACAGTGA  
TTTTCCCTAAATAAAAAACTGCTTCAAACCATTCATTGTCTTTCCACTGCCTT  
AAAGATAAAGTCCAAATCTAGAACATGGCCACAGCATTGGTGCCCTCACC  
ACCTCTTCAGCCTCTCAGTTGCTGTTACCCATTTCTCTATTCTCTCCTTCT  
CACACCTTGTGCTGCAGCCACATAGATAACCTGCAGTTTTTGTAAACGTGCAA  
TGATGTCTCAAATCCAAGGCATTGCTGGTACCACACAGCCTGCCTGGTAAA  
ATCCTAGACTTCTTTCAAGATAAATTCAAAGACACCTCCATGAGGTCTTTCTA  
CCTCTCCAAGTAGAGTTGACCGCTGTCTCCTTTGTGTCCCCACTTCCACCAC  
CATCCTAAAATACTTATTATACTTAGATTAATAATTGTGCTCTTACTGCACTG  
GAATTACCCTGAAAGGAAAGGCCATGTATTATTTATCATTGTCTTCTAGTAC  
ATAGCCCACAGCCTATACCTCCCACCCCAAAAAAACCTTTTTGTAAATAATT  
GAACAAATTAAGAAACACCCAAGGCCCCCAAGTAAACATCAAGGCCTAAGGA  
ATGCATATCTGGATTCTAAATAATCATAAGGTTTTACAACACCATGTTAAGCA  
CCAGGGACTTCAGAGAGCTTTTAGTCTAAATCTTATTAGAGAGGCCAGCGAA  
GACCTCCCAAAGGAAGTGGCATTGAACTGAGACTTGAAAAGCCAGTAGTTA  
GGCAAAGATAGGGAGGGAAATATTTAGACGAAGGGAGGAGATGGCACAA  
GATTTAGGACACGGAAAAGGGTATGGTGCAGTCATAGAGAAAACAGATGTG  
CAGAATGGCTGGAGCCCCAAGAGGGGAAGGGGAAGGGCGAAGCAATGAAGAT  
GTGAGGCAAGCAGGACTGGACCATGCAGAGTCTTGAGATGTTACAAAGA  
AAATTGCAGCAGGTAGTCCCTAACATCGTGCTGAACAGTTAGGCAACTTGG  
AGGAATATGTATATTTGTACTCATAGTCAAACCACTAGATGGCATTACAGA  
CTACGTTTTGTGATTTTTATTTTTACTTTTTGTTTTTTTTTCTTATGTTAGC  
AAAAGTATGCTCGCTATTGAAATGTTGAAAATATTTATTGGTCTTAAAATGA  
TGCTTATTTTTCCAGATGCTTGCATTCACTCTGCATGTGCTATTTTGTGATGT

GGTTTGCTTAATTTATTAACAATTGTATTAATTAATATATTAATTATAAATTG  
ATTAATTTATAATTAATTATGTGTTATAATTAAGTTAAATTTATTAATTACTTAA  
ATTATTATATTCACATTCAGATGCAATCTGAAAACCCATTTGTTCTCACACTG  
CTATAAAGAAATAACTGATACTGGGTAATTTATAAAGAAAAGAGGTTCCATTT  
GACCCAGCCATCCCATTACTGGGTATATACCCAAAGGACTATAAATCATGCT  
GCTATAAAGACACATGGACGTGTATGTTTATTGCGGCACTATTCATAATATC  
AAAGACTTGAACCAATCCAAATGTCCAACAATGATAGACTGGATTAAGAAA  
ATGTGGCAAATATACACCATGGAATACTATGCAGCCATAAAAAATGATGAGT  
TCATGTCCTTTGTAGGAACAGGGATGAAATTGGAAATCATCATTCTCAGTAA  
ACTGTCGCAAGAACAACCAACACCCGCATATTCTCACTCATAGGTGGG  
AATTGAACAGTGAGAACACATGGACACAGGAAGGGGAACATCACACTCTGG  
AGACTGTTGTGGGGTGGGGGGAGGGGGGAGGGATAGCATTAGGAGATATA  
CCTAATGCTAAATGACGAGTTAATGGGTGCAGCACACCAGCATGGCACATG  
TATACATATGTAACCTAACCTGCACATTGTGCACAGGTACCCAAAACTTAAA  
GTATAATAATAATAAATAAAAATAAAAATAAAAATAAAAATAAAAATAAAAATA  
AAATAAAAATAAAAAGAGGTTTAATTGCCTCATGGTTCTGCAGGCTATACAAGA  
AGCATAGTGCTTCTGCTTCTGGGGAGGCCTCAGGAAACAATCATGGCAAAA  
GACGAAGGGAAAGTAGGCACGTCTTACATGGTTGGAACAAGAGCAAGAGA  
GAGAGTGGGGAGAGAGAGCCTTGGAGCAGGAGCAAGAGAGAGTGGGGAG  
GTGCCACACACTTTTAAACAACCAGATCTTATGAGAAATCACTATCTCCCAG  
ACAGCATCAAGGGGGATGATGTTAAGCAATGAGAAACCAGCCCCATGATTC  
AATTACCACCCACCAGTCCCCACTTCCAACATTGGGGATTACATTTCCCCAT  
GAGATTTGGATGATGCCACAGATCCAAACCATAACCACTCACCTAATTCTTTC  
TACGTAAGAATTTGTCCAAGCATTTATAACAATTAGCATTTCATTTAACATCTT  
TTATGAATAAAGCACTATTCTCATGCTGAGAAGATTCAAATAATGGGAAATT  
GAAGTCCTAGGAACAAGTTTTATGTTTCAGAAGAGCCCATTTGGTATCCACA  
GGGCTAAGAAATGTGCACCCTAAATGTAAGTGGATTACACTGAACTGAAAG  
GTGTAAAGAAGGAGTGGAAAGATTAAAGGGAGAAGCTTGGAGAGGATGAAAG  
TTAGAAATGGAAGTGACGAGCACACCTGAGTGAAGGATGAGAGCTCCAGCT  
GCATTTTCCAGTTGTATTCCCATGTTGCTGAGCCAAAGGCTGATCTCAAGTT  
TATTGTTACATGCCCATTTAAGGCTTCTGGCCATTAACACTTTTGATTTTTTTT  
GGCTTGTGTTTTACTAGCTATTTTCACAACACTTTCATAGCTAAACCTATTTT  
ACTCAGATTGTATGCCTTTTCAAAAATACAATAGAAGGTCCATATTCCATTAT  
CTAGAAATAAGCCAAAGCTCATATCTAACATTTATTAAGAGAGATGGATTATT  
TTTGTTTATTAGTTATCTTTATAAATAATTTTTACGTACTTTAGTTGACTCATAA  
AGATGTTTCTTTCTGTAATTTTAATCTTAATATTTGTTGAACTTCAAAATCCCT  
ATCACCAGGTTATTGTTTAAAAGCATTGGTTTTTATATTATCTTAAAAGCCATT  
ATACCTGAGTGCTGAACAACCTTAGAAACATTGAGTAATTGTTTTGCATGCTAT  
TTAGTGAATTCATATGGCAATCGTTTATACATACATGATGGAATCAGGTGGC  
AGGCCAAGTTAAAGAGCAAGGCCAGAAAAGA ACTTAAAAGAGAAGAGAAAA  
AATAGACAGTTTAGGAACAATAGATCATGTCTTCTCCATGATTTGGAGGTAA  
ACTGATTACCTATCAGCTGATAAATAGAGGAAGGTTTTAGAAGTCTTCAGTT  
GGGTAGACTAATGAGAGGTGTCAGAGAAGATGTTTTCTGTTGTTTGTGGGT  
CTCCAGGAACTTTGAGCATTGAGCTGAGGGGCCAAGTTGGCTGCCTCTGA  
GAAGAAGCCCTTCCACCTCCACTCCATTGCACTTGGGTGCCATTCCCCTCA  
GTTGAATATCTCCAAGAGATGAGCAAATGTACATCTACAGAGTTCAGGGTAC



TGACTTTTATCATAATGATTTATAACTCTCAGAAGAGTGAAAAACACATGAAT  
GCACAGAATAGGAGATTGAAATATAAACACAGAACATTCATACAATGGAAT  
ACTCTGCAGTCATAAAAATCTTCTCATAGAAGAATATTTGACAGCATAGGGA  
TATCTGTGGCATATTAAGTAGAAAGTCAGACTTGTAACATTATATACATATT  
CACGTATATTTAAACACCATGATCCCATATTTAGATATAACAACATAAAAGTTC  
AGATGGCTATATATCAAATGTGTCAAATGTTCAACCTTGCATAGGCTGACT  
GTAGATGAATTTTATATTATTCTTTGTGCTTTCTTGTAGTTCCCAAATTTTCTT  
TACTGAATCTATATTACTTTTGCAATTTAAAGAATTTAATTTATAAAAATTTTATA  
AAATAACTTATAAATTTGAAATGTATTGCATTTAAGAATAAAAAGTGTTTAATT  
ACAAAATAATTCACAATTTATTTAATGAGATTTTAAAAGGATATATGTGAGTC  
TACATTCTGATTTTCATGTTTGCATGCATGGTTTTTTTTTTCTTTTGAGACAGAG  
TCTCGCTCTGTGCGCCAGGCTGGAGTGCAGTGGCGTGATCTCGGCTCACT  
GCAAGCTTTGCCTCCTGGGTTACACAATGTAATAGTGTTTTATTATTGTTTC  
CATTTTTATTGAAGAAGTAAGATTGTCCTAGCAGATGGAGACACTGAGATA  
TGGGACAGAAGTTTTGTTCTATATAATTATTATGCGCTTCCACCTTTCTTAGC  
ATAGACAGTTTCCAAAATGCAACTTCAAGTTACCCCTTTATAAGCATAATAAC  
ATAATACCCAACATATATGTAATGCTCTTTATGTGCCAAGTACTATACTAAC  
ACATGCACATTACATACACACACACCACATACACACACATATTTAACTAATT  
TCGTTCTCACAATGACATTTTGAGGCAAGTATTATTATTGTACAGATGAGAAA  
ACCAAGGCACGCTTTATCTGTAAACCTCTGCTATGCAGAAATTCTGGAGGG  
GCTTCTGGCCCCTTAATTTTAAAATAAGGCCAATAATACAATACTTACCACAT  
AGCAATTCTCTAAACATTATGTAAGATATATACCAAAGCGCTTAGCTCAGGG  
ACTGGAGGGATGTGAGGGAATTTGTCTTTTGCAATATGCTTTATGGTCCGCT  
CAGTCACCTCGTTCTTAATCCCTTTCTCAACTTCTATTTTATACAGAAATTGT  
GAGCATATCAGCATTAAAGTACCCTGAGGTGGCAATGCACACTTCAACTTCT  
TCTTCAGTCACAAAGAGTTACATCTCATCACAGACAAATGGTTTTGTTTTATT  
TTTTTTTTTAAATTGTGGCTCCGAAATCATTTTTGTGATGTAACCCATTTTAGG  
GGACCTGTCACTGCAGAGAACTGACAAACACTGAGAAATGCGAGCTAAGT  
AGACACAGCCTACTAAGTAGACACAATTCCTACTATGGAGGAATTCTTGCCCT  
CTGAAATATCTCACAGAAATAACTGTGAGTTAAAGAAATTAACAATGTG  
GCAAAGCACAGAAATGATGCACGTGACCATGAAATAGTGGGCCAGATAAAG  
GGGACCTAATAGTGCGGTGGTGCAGGGTCTGTGGGCAACTGAGTTCA  
GCTCAGACCCGGGCTCAGCTCTATGCCAGCTGCTGACCCAGGGTGAGTTG  
CCCTGCAGGGTTTCTATCCCATTAATTTTAAAATGGGGCCAATAACACAGTA  
CTTATCTCACAGCATTCTCTAAAGGCTAAATAAGAAGATGTATCTAAAAGTT  
ATTAGCTCAGAGCCTCACACATTCTCAGTGACTGATAACAATAAGCAAAGC  
TGGGTGCTGAGATAAGAGTAATCTGGTGGCAGTCTCTCTTGTAGTTTTAG  
GGGAGAAGAAGAAATTCTGGAGCCGCTGCTGGGAGGGATGTGGGAGAGTT  
TGCTTTTCATAATACGCTCTATGTCCACGCAGTCACCTCATTCTTGTGCCCTT  
TCTCAACTTCTTTATATGCAGATACGCACAACGGGACACATATGCAGCCA  
CTCCTAGAGCTCATGAAGTTTCAGAAATTTCTGTTAGAAGTGTACCCTCCA  
GAAGAGGAAACCGGTATGTTCTTAGTTTTAAATAGTTGCTCTGGAGTCATTG  
TTGTGATTGAACTCTATTTACACGAGCTGTAACCTCATGACAGTTCTCAAGCTT  
TCGTGACAGAAAACCCATCTCTTTTACTCCAAAGCCCATATAGCACCCACAA  
CTATTAAGTGTGACCAAGAAAGAGAAGGCAAGCCCAATTAACCTTTGTACG  
TAAAGCCTAAAGAATGAAAAATATACCTGAATCCTCAATCATCAACAGCAT

AGTATATACTAAGTAATTTGTAATAATTAAACTCTAGAAAATTGTGTGGCTTC  
GGTAGTAAGAGAGCTTCATGATGTAAAATGGCAAGTGGAGACAGAGACAAA  
AGTAGGATGTGGACTGAGAGGGAAGGTTAGCACAGGTGGAACAGTAAGGC  
AACCATACTATCAATTGCTGCTGACATAGAATCCAGAGAGACTATTGGCAA  
AGCTCAAATGAGACACAGTAACAGTTTAGATTTCAGACAGTGGCTGTGGCATA  
AATCAGAAAATTGATAGTCGCATGATCCCTCTTTGCATGGGACTGGCATCTG  
TGTGGAGTAATGGTTCCATATGCCTCCTTTCTTCTCCTTATTTTTAAATTTTT  
AAAAATGCATTGCTTCTTGTGGAAGTCAATAAGTGATTCTTCCAATACTTTCT  
CATTCTTCCCCCTCAGTTATGAGACAATTTGCTTATTTCTCATCCATGAATA  
CTTGTTGGGTCATTAAAAGTAGATACTGAAATTAATAATGGTACGACTGACA  
TATTACCTCATAAATGTTACTAGCTAGATGTTGAAAGTTGACCAACAACTCTC  
AAAATATGATTAAGAAAAGGAAACCCACAGAACAGTTTGATTCCAAAATGATT  
TTTTTCTTTCACATGCCTTACTTATTTGGACTTACATTGAAATTTTGCTTTAT  
AGGAGAAAGGGTACAACCTTGCCCATCATTCTCTGAACCAGGTATGTTAATA  
TTTGACAAAGAATAAAAAGTCATTCCATTTTAACTATCCATTGCTTGTTCAA  
TGCCTAAGAAAATGTGTCTATCTTAGAAGAGCATATGTTGTTAACTTTATTCA  
CACAAAATTGTAAAGGCAAAGAAAATATTCTCTTTTTAAAATTAATAAGGCA  
TTTCTTATTTTTAAAACATTTTGGGGGCCAGGGGCCGTGGCTCATGCCTAT  
AATCCCAGAACTTTGGGAGGCTGAGCCTGGCTAATCGCTTGAGCCCAGGAA  
TTTGAGAACAGCCTGGGCAATATGGCGAAATCCATCTCTACAAAAAATACAA  
AAATTAGCTGGCATGGGGCACGCACCTGTAGTCTCAGCTACTTGGGAGGCT  
GGCTGAGGTGGGAGGATCGGATCCATTGCCTGAGTCTGGGAGTTTAAGGC  
TGCAGTGAGCTATGACTGTGCCACTGTACTCTAGCCTTGGTAAGACCCTGT  
CTCAAAAACAAATACATAAGTAAATAAAAATAAATAAAAACATTTTGGAAATA  
GAAATACATAATTTGGTAATAGTTTTCTCTTAAGTTAGATGTTTTACCTTTCT  
AACCAAGCCTGAGTACTTGAAAAAGCCTCATAAGAGCTTATAAAACAAATG  
AACTTCCCTCATATAAAAAGCAAGGCATTTAAAATCATCTAATTAAGTGGTAC  
TGTATTTCAAGGGTAAATCTCAGCCTTGATTCATTTTTGGCCCAATGCAACCA  
CTTAGGGACCATCTTGACAACCTCTGCTGAAGGGACATCCCTTCCCCTCACT  
TGAGTATCACTGTGTGTGCTCATTGCTATTCTGCATTCCAACCCTCCCTTCA  
CACTTGGCTGTGTCCACGGCTCACAGGGTAAAAGCACATCATAGAACTTC  
ATCACTATCGCATACATTCAAGCTAAGTGGTCAAGAAGGCTGGGCAACACC  
AGCAAGAGGAAATGCTACTTTTTACTTTTTATCAACAATAGGGCTTTTTAAATAT  
TAATTAGGCAAATAAATGAGCCATTTTACCTTTATGTCTAGCCTTCCATTCTA  
TTTACTTCAACTGGAAGCACTACAAATATGCTATAAATATGGAAATATCTCTT  
AATTGATTTCAATTGTTTCATTCCCAACATATAAATGACTCAACAAGCATTTTT  
AGTGACTACATTGGAGACTATGCATAAGAATACTATGGAAGGAATAAAGCTT  
AGAACATAGATGACCTGCATTATAATTATAATTCTACTTTTAACTAGTTGTCT  
GACCAAGGCTAAGTTAACCTTATTCAGCTTCTTTTCTTCATTTGTAACTGTT  
TATACCAGTTTCTTTCCAAAATTATGATTCTATGATCTGTTCAATGCTCTTTTA  
TACATTAAGACATTATTTTCTCTCATAACTTCCAACTATGGGAGAATTTGTG  
GTTTTTCCCATATCTGAGGAGAACGTCCACTGAGTTCTTATCTACAGTTAC  
ACTAGTGAAGAACGCTGGGTCTGGAATCAGAAGCTTCAGGTCTTAGTTCTG  
TCATCAACTATTTTGGCACCCTTGGACAAAAGACTTGATCACTCACAGTCCCA  
GTTTCCCACAAGGTTACTGTAAAGCACACAATTTAAAAAAGACAAAATCTAC  
ATAATAGTATATTAATTGTGCTTTCTATTAAGGCAAGGTGATGGTATGCTG

ATGTTATCTGTCTTATTTTTTCAGTTGCTATATGGTCATTTATTTTCAGACTTTCA  
TAATTTTGCTGCTCTCTTTATCTCCTGTAGAGATAACACTCATTATTTTTGGG  
GTGATGGCTGGTGTATTGGAACGATCCTCTTAATTTCTTACGGTATTCGCC  
GACTGATAAAGGTGAGAATTCAGTTTTTAATTTTGCTGTAATACCAATGTGA  
ACAGCTCTAAGAGGGTTTATTCTCTGAGTTCAGTTAAACTCAAAGAGAAA  
CAGAACTGCATAAAATTCCATATTTTTCAACTGGACACATAGAAGTCACTGT  
GTTTCTCTAGCAGAATTTTTCTTTGCATTTGCCCAATTAAGGGGAACCTCTAA  
ATATAAATCTGTCCCCATTTTTCCCAATGAAAGATCTCCCTAAGTTTTGTCT  
AACTTGCTGTCACATATTTGATGGATATTGAGGAAATATTAAGATTCTACTT  
ATAGTATTTACCCTATTAGTGTATAAAATATTTAAAATAATATATTTACATATG  
TTTAAAACCTTTGAGGGGAAGCCAAGGCAGGAGGATTGCTTGAGCTCAGGAGT  
TTGAGACCAGCCTGAGCAAAAAGGTGAAACCTAGTCTATACAAAAAATATGA  
AAATTAGAAAGGCGTGGTGGTGCACATGTGTAGTATCAGCTACTCAGGGGG  
CTGAAGTGGGAGGATTGCTTGAGCCTGGGAAATCAAGGCTGCAGTGAGCT  
GTGATCATGCTACTGCACTCCAGCCTGGGCAACAGAGTGAGACCCTGTCTC  
AATAATTATATAAATAAATAAATAAAAATAAACAAAATAAAACTTTTTGCCTTC  
TTAATTCTCACATATTCTGAAACAGATTTTTCAAATTTCCACCCATGAATTCTT  
AACATCAGTGATTTTTTTTTGAATCATTAAATGCTTTTTTTAATTTTTTTTTTTT  
TTGAGACAAGAGTTTCCCTCTGTCACCCAGGCTCGAGTGCAAAGTGGTGCA  
ATCTCTGCTCACTGCAGCCTCTGCCTCCCTGGTTAAGTGATTCTCGTGCTT  
CAGCCTCCGCAGTAGTTGGGACTACAGGTGCGGGACACCATGCCTGACTA  
ATTTTTGTATTTTTTAAATAGCAGAGATGGGGTTTTCGCTGTGTTGGCCAGGC  
TGGTTTCAAACCTCCTGACCTCAAGTGATCCATCTGCCCTTGGCCTCCAAAGT  
GCTGGGATTACAAGCATGAGCCACCACGCCAGCCACTAATGCTATTTTT  
ACATCCATACAACACAGCTTATCGAAGTGCATAACTTTTGCTATCACTTTCTA  
TTCACGATATTTAAGACATAATATGTGTGTGTGATTTATGATGCTGTCACTG  
TCTCTGTAATCCTAGATCAGAAGTACTTAGTCACATGAGATTGGTACAGTTG  
TGTTTTCATTCATCCTCTATTCTTAATCTCTCTTTGTGATTTTTGAGACCATAA  
CCACTATATAATTCTTTTTAAAAGGCTGAGAGGTGTGACAGCACTGCAATTG  
TGGGGCCATCAGAAGATATGATAGTAATATCTACATTAAGTTCCTTTGCCTCT  
TTTCTTTTTTAACTACTTCTAACAGTTAACTTCTACCATCATCCAATCCTATAA  
TTGATTTTCAGTATTCCATGTAATATATCTTCCCTTAAATAATACTTTTTGTTAA  
TCAAAGAAAAGTAACTGAAAATGCCTACTCTTGTGTGAGATATTTTGTAAGG  
ACTTTAATATAAGATAGCTTTTTTTGCCTGGAGTATAAAAAGAGAAAAGTCATC  
TTCTTACATGGGCATATATGGCAAAGTGGGTTGTCTTCTCTCTTCGTCAATG  
TTCTAAAACCTGAAAAAGCCAAGGAAATATTTAGTTGGCAAAGTTCAGAGAA  
TTTTCTAAGTGTATATGGATGAATTTTGCCTGGTCAACATGATGCAGAGATC  
ACACACTTTATTTTTATTTTTATTTTCACTTTCACTATTTATTACAGCAGGGAA  
ATATGTAAGTATCAGTGTTTGAGGTGATATTTCTCCTACTGAAATACCAAATA  
CTATAGAGGAACACAAATACAAGTTTAAATCAATGCTTATACCAGTAACTAGT  
AACAAACAATAACAAAATCTCTGCAAAGGGGATTTCAACCAAAGAAAAA  
AAATTTTAGAAAAAATATTTTTAAGCTGAAGCATTTTACTTTTTACTGTCTTA  
AGACTAGAAAATTGTGTTATTAATATTTTATGGTATTTCTTCATAGAAAAGCC  
CATCTGATGTAAAACCTCTCCCCTCACCTGACACAGACGTGCCTTTAAGTTC  
TGTTGAAATAGAAAATCCAGGTTGGTGTAAATATTTGCAGTTCCTTTTTGCCTT  
TTAGGAAAAAAAATCAAACCAGTGAGTTACTTCTTTCTGATTTGAGGGAGG

AGGGAACCAGTTATGATTCATTTCTATTCTATCTCATTAAATTCTACTTCTTTGA  
CTTTTTAGAAATGTCTGCAGCATAGTGAGATTCTCCTTTGGACACAAAGTGTT  
TTGTTTTGTTTTGTTTTTTAACAACAAAAAAACTCAATCAAATAGTAAAA  
GCAAAAGAGAAAACCAAGTGTACTTCGTATTTCCCAAAGTCAAAGTTATGT  
GTATAGGAGACTCTATGGTCAGTATGGTGTAGCATAGTGAATTAGCCCCAG  
ATCTGAAATCAGACTTGGATTTGAATCCATGCTCCAACACCTATTAGCTGTG  
TAACCCTGAGCAAGCTACTAACCTCTTTAATATGGGGATAATGATAGTAT  
CAACCTCACAAAGTTTAAATGAGAATTAATGAGCTACAACCGGTAAAGCATT  
TAAAACCATTTGTGGCCATCATAAGTCCTCATGCCTGTTAGCTGTTATCAATA  
TAGCACTGACATCAATGCTATATCAATATAGCATGTTATCAATATAGTGTCAT  
TCCCAAATGACCTCCTGTGCACACTGGCAAGCCATCTGGCACATGCTTTTCAT  
CTCCACTCCCAGGTGCTAAGCAGATACAAAACATGTGAAAGGCCATGGATA  
TATTTTGTTTATCCAGAACAGTATTAACCACATAGTGCTTTTTGAAAAGAAT  
ATTTATTGTCAACCTTTAAAAGTCGGAAATTGTTACATTTTAAAAATCAAGTAT  
TGCTATTCCTCTGGGGAAAAATGTAAACTCCCAAATGCTGAGAGCCTTCAT  
ACCAGCATGAGACCAATTCCTAAGAGCTGAGTAGTGGCTGCTACCTGTACT  
GTCTGTCTAAATCCCTAGCCAATTGCATTTGTTTTATTCACCGTGGCCCCTG  
GTATGAACTCACTAAGAAAGCATATAGTTTCTATTAACCTTTGCCTGAAGCAT  
AAACCCAAATGACATCTATTTTGGGAGATAGTTACTAAGAACAAGTCTCTGG  
AATGAGCTTTATTTCTCAAGCAAAGAGATTTTATTCTGCCTTCTACAAAATC  
AACTGATTTTACTCCCATAATTTTTCAGAAATCATGACAGATCAGAGGTCCTGT  
ATGCTTCTGGATTTTCGATTTTAAACCCTGGGCCAGTCTAGGTTTTCTAGACTTT  
AGAGTCACAGAACACAGAGTTTTCAAGATCCATCACAGCTACACAGGTTATA  
TGCAGGATTTGCCACATCACATTATCATGTGAATTCTTAAAGCTTAAAGAGTAA  
TTGTTACATAAGTTTATAATCCTAAGACATTCCTGCTATGTGGAAATGAATGG  
CATAGATATGATTCTCAGCTAAAAGGATTAATAAAATCCAATCTGCAGATACT  
TGAAACAACGGAAGTTTTTGAGTCATATGCCAGATTCACTTCATTTACTAAG  
GTTATCTTGTTATTGGACTGGCAGCTGGAACAAGTATCTGTAAAATATTCATT  
TTATCTGCATTCTGCCTTGTTCCACAAAAAGTCTTGATGTAGTTTTTCAAGT  
GGAGCAATTACAACCTAAAGCCTATTTTTCGAACTGAAATTTATATACATTTT  
TAGCTACTTATTTATTCTAGAGACAAATTTATTGTTTAGAGTTTCCCCTGCCA  
TTTTTTTCATACAATTTAAGCATCTCAAATGTTTGGCACAATTAATACGCCA  
CAGTGCATCAAGATGTCCTTGTAGTTTAATTAGTTAAGTGCAACAAACATTT  
GCTAAATGCATACAGTGGGGTAGGCACCACACTCACATTAGATATACCAATA  
TGAGTCTTCGTCCTTTAGAAGCTGAGAGACTAATGGAAAAACAGAATGTCA  
TTGCAGTGAACAAGTTCTACAGTAGTGGAGGCAATAGCTCCACTTGTCCCA  
GAGACTGAGACAGGTATCAAAGGCTTCTGAAGATGAAATCACCTGGGATTA  
GCCTTAAAAGACAGATAGATATTAGCTAGGGCAGGGTAGTTTTAGCAGAAG  
GGCAGCCTGAGTGAGTAAAAGCATGGAAGACAGAATATGTTTACTTAAAGAA  
TTGTATGCATTTCCACATTAGCAGGATTGCTGCTTTGGTTCTCTGTTACATC  
TCAAATATGTGTAATGGCAGTGGAAAGTCAGAAGAACCAAACCTTTAGGCTCA  
CTTTATTTCCCACATTTGTGCAAGTGAAGTTATTAATGTCTTAGTATGTTA  
GTGAGACAAGTTATGAATTCTGACTGCACCTCACAGAAAACATAGGAAAACA  
CATTATTAAGATTATTTAAAATGCTTTATTTCTACTTTTATAGAATATGGCTC  
TAAATTAGTTTATAAGCCAAAGGCATAAGAGGTTAAAATGACAGTACCATCT  
CAACAAGAACTAATGATGTAAGGAGTAATTAGAGTATAAATTGTTTTAACCT

TCTAAAAGTGCACATGATCTGTGATTGGTGAAAAATGAGAATAAGCGAATCT  
GAGTCAGCTGGCCACTGTGGCATGCATATGTGACCCACTAGCCTATTTCCC  
ACAGGAGAATGTTTGAGATGCACAGTTCCTGTGGTGCCCAATAGAAGAAG  
GCTGGAAAAGCTCTGCTTCTGGAAGAGCAAGGGCTCCCCTCTCCCTTTCAT  
GCAGTTTCTAGGAGCAACATAAATTCAACCTTCCAACCAGGAAAAGTGGAG  
CATCGGGTTTACTGGAGAAAAGTCCAGTGCCTTCTTTTACACCCTAGA  
ACCAGAGAGGAACTTGGCCATAAGCTTTTGTGCAGACTTCTCCTTGGGGGA  
AAAAAAAAGTCATTATTTAAAAGACATGACAGACTTAGACACATGCCTTAAA  
TTTTAACATGCATATGTGATTCAACTTATCATTACTGGCTTCACATTATATTT  
TGCTCTATAACAAGTTTGGCTGTTTGTCTTATCTCTGTAGAACTAGGAGC  
AGAGCAATTATTTATTCTTTACCTAAGGCTTTTAGAATAGATATTCTAAGAA  
ATTCTGTATTTTTCTTTACACAAAAGTTCGCAATAGAGCTAATATGTAAGGAG  
AGTCCTTTCGTTTCCTACTAATTACATTCAAGAACAAGTCTGCAAGAATGTAG  
AATCCTAAAATGTATACTGTGCATTAATTTCTGTTGTGTTTAAACATAACTAT  
GTCTCATATTTTCGGTCTTGTATTTTTTTTACTATAATCCTTCTAGAGACAAGTG  
ATCAATGAGAATCTGTTCAACCAACCAATGTGGAAAGAACACAAAGAAGAC  
ATAAGACTTCAGTCAAGTGAAAAATTAACATGTGGACTGGACACTCCAATAA  
ATTATATACCTGCCTAAGTTGTACAATTTTCAAGATGCAATTTTCATTATAATGA  
GTTCCAGTGAAGTCAATGATGGGGAAAAAATCTCTGCTCATTAAATTTTCAA  
GATAAAGAACAATGTTTCCTTGAATGCTTGTCTTTTGTGTGTTAGCATAATTT  
TTAGAATTGTTTGAAGAATTCTGATCCAAAAGTCTTGAATTCATCTACGTTT  
GTTTAATATTAAGTAACTTAACTTATTCTATTGTATTATAATGATGATTCTGTCAAAT  
GAAAGGCTTGAATACCTAGATGAAGTTTGAATTTTCTTCTATTGTAAACTT  
TTGAGTCTGGTTTCATTGTTTTAAATAAATTAAGGGGACACTAAAGTCCTATC  
ATTCATTTCTTTCATTGCTGAACAGGCAAGATATAATATTACATGAATGATTA  
CTATATTTTGTTCACACTAATAAAGCTTATGCTCAGAAATGCCATACACACAC  
ACACACACACACACAAACACACACATTTATCATTTAATGCATAAATCAACACA  
AAAGGTTTTCCCATTAATATGAAATATTACATATATATAAGTGCCATATTTAAA  
ATAATTTGTCTAACAGTAGAACTGTGTCCGAGCACTCACTGAAGCTTGCATT  
CCACTGAAAGAGTTATTTGTGTAAGTAGAGTATCCGGAGAAGGAAAAGAACT  
TACGACCTTTCTTTATAACAGAACTCAACTCTAAATTCACAAGATGTGCAA  
ACCGGACATGCAGGTGAATATTTAATAGGTTACTATAAGGTTCTCAATTTAAA  
TTCTTTAATCTGTCCAGTCCCAGTTTCTCTTATTAATAAAAGTGGAAATTGC  
TTTTAAACCATTTAAAGGAAATTTCTAGATATAGAACTAAGGACTGTGACTAT  
ACAGCTGTCACTCATTGTTAGTAAAAGTAAAAAGCAAAAACAAAAACAAAA  
AAGACCTTCTGTGATACTTTATTTCCGAAGTAAATAAAATCTATATGACTTTT  
TATTATTGTGTGATAACCAAGTAAATGTTTTCTATTTTGCATATTTTTCAGGCAT  
GGTAACAGAAATTTACCTTTTAAATAAATTAATAAATCTAAATTTTAACTACTT  
GTATGTTCCGAGAGTGTTTTTGTACTATATTGACTACTTAAATAGAGAATGA  
GACTAAGAAGGGAACATTTCTGTTGATACATGTTTTTTTAAAGTAATTTTAAAG  
AGCATTATTAGGTTAATTAATCCAATTAATGACCCAAATGCCAAGGTAATTTT  
AAATTTACATTTTAAATAAAAGCAACATGTTGAAACAAGAGAGGGTGAGATTA  
ACCTTTTTGCTAAAGTAATTTACAAGTCAAAGACAGGAAGAGATCAGAGTGA  
ATGTGCCTTCTTAAACCAGAGCTACAGAATTTAGTGAATAATTAAGTACAAAC  
TGCTTTGACCTCCTTGAAGTTCCTTCAAGCAATTTCTCTGTACTTCTATATATG  
AATGTCTTAGCCAATTTTCTGCTACTATAACAGAATACGACAGACTGGGTAA

TTTAAAAGAAAAGAAATTTATTTTCTTCCTAGTTCTGGAGGCTGGGAAGGC  
 GAAGGGCATGGCACTGACATCTGCCTTGTAAGTATGAGAACCCTTCTTACT  
 GCATGATAACAAAGCAGCAAGGCAAGCAAAAGCGTAAGATGAAGAGAGAGG  
 AAATGAAGCCAAACACATCCTTTTCATCAGAAGCCCATTCCCTCTATAAGGCG  
 TTATTACATTTATGAGAATGGAGTCCTCATGACCTAATCGTGACCTTAAAGG  
 CCCCTCCCAACACTGTTACAATGGCAATTAATTTCAACAAAGGTTCCAGAG  
 GTGACATTCGAATCAGCAATGAAATTTTTCATAGTTAAATTTGGTATTCGTGGG  
 GGAAGAAATGACCATTTCCCTTGATTTTTATAATTAATCAGCAAAATATTG  
 TAATAAAGAAATCTTTCCTGTGAAGATACCATGACCCCA

**Selected Module Sets:**

**Left Module Count:** 3

**Spacer Nucleotide Count:** 5,6,7

**Right Module Count:** 3

**Ignore Asp Overlap:** False

The results below are zinc finger arrays that can be constructed using CoDA. Note that other methods (including modular assembly and OPEN) can also potentially be used to target the input sequence of interest.”

Sort By:   **Hide intron splice sites**

[ZFN-GI|224589816:C145061904-](#)  
[145030456\\_HOMO\\_SAPIENS\\_CHROMOSOME\\_4,\\_GRCH37.P2\\_PRIMARY\\_REFERENCE\\_ASSEMBLY-SP-7-1](#)  
 266 tTTCCTCTTCCAGTCTG**GTGGATGGA**t 292  
 266 a**AAGGAGAAAG**TCAGACCACCTACCTa 292

| FINGER   | HELIX   | TRIPLET    | REFERENCE NUMBER | SOURCE |
|----------|---------|------------|------------------|--------|
| Left F1  | QASNLLR | <b>GAA</b> | -                | CoDA   |
| Left F2  | RQDNLGR | <b>GAG</b> | -                | CoDA   |
| Left F3  | QRNNLGR | <b>GAA</b> | -                | CoDA   |
| Right F1 | DKTKLRV | <b>GGA</b> | -                | CoDA   |
| Right F2 | VRHNLTR | <b>GAT</b> | -                | CoDA   |
| Right F3 | RRAALGP | <b>GTG</b> | -                | CoDA   |

[ZF DNA Sequence](#)

**Blast**

[ZFN-GI|224589816:C145061904-](#)  
[145030456\\_HOMO\\_SAPIENS\\_CHROMOSOME\\_4,\\_GRCH37.P2\\_PRIMARY\\_REFERENCE\\_ASSEMBLY-SP-7-2](#)  
 7277 cTGCCTCAGCCTCCCA**GTAGCTGAG**a 7303  
 7277 g**ACGGAGTCC**GAGGGTTCATCGACTct 7303

| FINGER | HELIX | TRIPLET | REFERENCE NUMBER | SOURCE |
|--------|-------|---------|------------------|--------|
|--------|-------|---------|------------------|--------|

|          |         |            |   |      |
|----------|---------|------------|---|------|
| Left F1  | RRVDLLR | <u>GCA</u> | - | CoDA |
| Left F2  | RQDNLGR | <u>GAG</u> | - | CoDA |
| Left F3  | VSNTLTR | <u>GCT</u> | - | CoDA |
| Right F1 | KHSNLTR | <u>GAG</u> | - | CoDA |
| Right F2 | QRSDLTR | <u>GCT</u> | - | CoDA |
| Right F3 | QSGTLTR | <u>GTA</u> | - | CoDA |

[ZF DNA Sequence](#)

Bos taurus (cow) Build 3.1

Blast TGCCTCAGCNNNNNNGTAGCTGAG

ZFN-GI|224589816:C145061904-  
 145030456\_HOMO\_SAPIENS\_CHROMOSOME\_4,\_GRCH37.P2\_PRIMARY\_REFERENCE\_ASSEM  
 BLY-SP-6-1  
 7278 tGCCTCAGCCTCCCAAGTAGCTGAGa 7303  
 7278 aCGGAGTCGGAGGGTTCATCGACTct 7303

| FINGER   | HELIX   | TRIPLET    | REFERENCE NUMBER | SOURCE |
|----------|---------|------------|------------------|--------|
| Left F1  | APSKLKR | <u>GGC</u> | -                | CoDA   |
| Left F2  | QREHLTT | <u>TGA</u> | -                | CoDA   |
| Left F3  | ESGHLKR | <u>GGC</u> | -                | CoDA   |
| Right F1 | KHSNLTR | <u>GAG</u> | -                | CoDA   |
| Right F2 | QRSDLTR | <u>GCT</u> | -                | CoDA   |
| Right F3 | QSGTLTR | <u>GTA</u> | -                | CoDA   |

[ZF DNA Sequence](#)

Bos taurus (cow) Build 3.1

Blast GCCTCAGCCNNNNNNGTAGCTGAG

ZFN-GI|224589816:C145061904-  
 145030456\_HOMO\_SAPIENS\_CHROMOSOME\_4,\_GRCH37.P2\_PRIMARY\_REFERENCE\_ASSEM  
 BLY-SP-7-3  
 8186 cAGCTTCTGCCTCTCAAGTAGCTGAGa 8212  
 8186 gTCGAAGACGGAGAGTTCATCGACTct 8212

| FINGER   | HELIX   | TRIPLET    | REFERENCE NUMBER | SOURCE |
|----------|---------|------------|------------------|--------|
| Left F1  | QRQALDR | <u>GCT</u> | -                | CoDA   |
| Left F2  | QQTNLTR | <u>GAA</u> | -                | CoDA   |
| Left F3  | QGNTLTR | <u>GCA</u> | -                | CoDA   |
| Right F1 | KHSNLTR | <u>GAG</u> | -                | CoDA   |
| Right F2 | QRSDLTR | <u>GCT</u> | -                | CoDA   |
| Right F3 | QSGTLTR | <u>GTA</u> | -                | CoDA   |

[ZF DNA Sequence](#)

Bos taurus (cow) Build 3.1

Blast AGCTTCTGCNNNNNNGTAGCTGAG

+

ZFN-GI|224589816:C145061904-  
 145030456\_HOMO\_SAPIENS\_CHROMOSOME\_4,\_GRCH37.P2\_PRIMARY\_REFERENCE\_ASSEM  
 BLY-SP-6-2

8812 tCCTAGCTACTTGGGAGGCTGAGGCa 8837

8812 aGGA~~TCGATG~~AACCCTCCGACTCCGt 8837

| FINGER   | HELIX   | TRIPLET    | REFERENCE NUMBER | SOURCE |
|----------|---------|------------|------------------|--------|
| Left F1  | RSSHLKM | <u>AGG</u> | -                | CoDA   |
| Left F2  | QRSDLTR | <u>GCT</u> | -                | CoDA   |
| Left F3  | QSGTLTR | <u>GTA</u> | -                | CoDA   |
| Right F1 | APSKLKR | <u>GGC</u> | -                | CoDA   |
| Right F2 | QREHLTT | <u>TGA</u> | -                | CoDA   |
| Right F3 | ESGHLKR | <u>GGC</u> | -                | CoDA   |

[ZF DNA Sequence](#)

Bos taurus (cow) Build 3.1

Blast CCTAGCTACNNNNNNGGCTGAGGC

ZFN-GI|224589816:C145061904-  
 145030456\_HOMO\_SAPIENS\_CHROMOSOME\_4,\_GRCH37.P2\_PRIMARY\_REFERENCE\_ASSEM  
 BLY-SP-7-4

8812 tCCTAGCTACTTGGGAGGCTGAGGCag 8838

8812 aGGA~~TCGATG~~AACCCTCCGACTCCGtC 8838

| FINGER   | HELIX   | TRIPLET    | REFERENCE NUMBER | SOURCE |
|----------|---------|------------|------------------|--------|
| Left F1  | RSSHLKM | <u>AGG</u> | -                | CoDA   |
| Left F2  | QRSDLTR | <u>GCT</u> | -                | CoDA   |
| Left F3  | QSGTLTR | <u>GTA</u> | -                | CoDA   |
| Right F1 | RRVDLLR | <u>GCA</u> | -                | CoDA   |
| Right F2 | RQDNLGR | <u>GAG</u> | -                | CoDA   |
| Right F3 | VSNTLTR | <u>GCT</u> | -                | CoDA   |

[ZF DNA Sequence](#)

Bos taurus (cow) Build 3.1

Blast CCTAGCTACNNNNNNGCTGAGGCA

ZFN-GI|224589816:C145061904-  
 145030456\_HOMO\_SAPIENS\_CHROMOSOME\_4,\_GRCH37.P2\_PRIMARY\_REFERENCE\_ASSEM  
 BLY-SP-6-3

11886 tTTCAGCTGCAAGTCA~~GGAGCGAAC~~c 11911

11886 a~~AAGTCGACG~~TTCAGTCTCTCGCTTg 11911

| FINGER  | HELIX   | TRIPLET    | REFERENCE NUMBER | SOURCE |
|---------|---------|------------|------------------|--------|
| Left F1 | TTTNLRR | <u>GAA</u> | -                | CoDA   |
| Left F2 | QRSDLTR | <u>GCT</u> | -                | CoDA   |
| Left F3 | QGGTLRR | <u>GCA</u> | -                | CoDA   |



|          |         |                     |   |      |
|----------|---------|---------------------|---|------|
| Right F1 | GHTALAL | <a href="#">AAC</a> | - | CoDA |
| Right F2 | RTDTLAR | <a href="#">GCG</a> | - | CoDA |
| Right F3 | QTTHLSR | <a href="#">GGA</a> | - | CoDA |

[ZF DNA Sequence](#)

Bos taurus (cow) Build 3.1

Blast TTCAGCTGCNNNNNNGGAGCGAAC

ZFN-GI|224589816:C145061904-  
 145030456\_HOMO\_SAPIENS\_CHROMOSOME\_4,\_GRCH37.P2\_PRIMARY\_REFERENCE\_ASSEM  
 BLY-SP-7-5  
 12101 aGCATGCAGCAGAGAGCTAGGAGGCTg 12127  
 12101 tCGTACGTCGTCTCTCGATCCTCCGAc 12127

| FINGER   | HELIX   | TRIPLET             | REFERENCE NUMBER | SOURCE |
|----------|---------|---------------------|------------------|--------|
| Left F1  | RNRNLVL | <a href="#">TGC</a> | -                | CoDA   |
| Left F2  | QSTTLKR | <a href="#">GCA</a> | -                | CoDA   |
| Left F3  | LKHDLR  | <a href="#">GCT</a> | -                | CoDA   |
| Right F1 | NKQALDR | <a href="#">GCT</a> | -                | CoDA   |
| Right F2 | RQDNLGR | <a href="#">GAG</a> | -                | CoDA   |
| Right F3 | RPESLRP | <a href="#">TAG</a> | -                | CoDA   |

[ZF DNA Sequence](#)

Bos taurus (cow) Build 3.1

Blast GCATGCAGCNNNNNNTAGGAGGCT

ZFN-GI|224589816:C145061904-  
 145030456\_HOMO\_SAPIENS\_CHROMOSOME\_4,\_GRCH37.P2\_PRIMARY\_REFERENCE\_ASSEM  
 BLY-SP-7-6  
 12104 aTGCAGCAGAGAGCTAGGAGGCTGGCt 12130  
 12104 tACGTCGTCTCTCGATCCTCCGACCGa 12130

| FINGER   | HELIX   | TRIPLET             | REFERENCE NUMBER | SOURCE |
|----------|---------|---------------------|------------------|--------|
| Left F1  | HNGTLKR | <a href="#">GCA</a> | -                | CoDA   |
| Left F2  | QRSDLTR | <a href="#">GCT</a> | -                | CoDA   |
| Left F3  | QRNTLKG | <a href="#">TCT</a> | -                | CoDA   |
| Right F1 | APSKLAR | <a href="#">GGC</a> | -                | CoDA   |
| Right F2 | QRSDLTR | <a href="#">GCT</a> | -                | CoDA   |
| Right F3 | RQDNLQR | <a href="#">GAG</a> | -                | CoDA   |

[ZF DNA Sequence](#)

Bos taurus (cow) Build 3.1

Blast TGCAGCAGANNNNNNNGAGGCTGGC

ZFN-GI|224589816:C145061904-  
 145030456\_HOMO\_SAPIENS\_CHROMOSOME\_4,\_GRCH37.P2\_PRIMARY\_REFERENCE\_ASSEM  
 BLY-SP-7-7

14164 tGCCTTCTTCTTACCAC**TAAGCATGC**a 14190  
 14164 a**CGGAAGAAG**AATGGTGATTCGTACGt 14190

| FINGER   | HELIX   | TRIPLET    | REFERENCE NUMBER | SOURCE |
|----------|---------|------------|------------------|--------|
| Left F1  | TRAKLHI | <b>GGC</b> | -                | CoDA   |
| Left F2  | QQTNLTR | <b>GAA</b> | -                | CoDA   |
| Left F3  | QTNNLNR | <b>GAA</b> | -                | CoDA   |
| Right F1 | RNRNLVL | <b>TGC</b> | -                | CoDA   |
| Right F2 | QSTTLKR | <b>GCA</b> | -                | CoDA   |
| Right F3 | QGGNLAL | <b>TAA</b> | -                | CoDA   |

[ZF DNA Sequence](#)

**Blast** GCCTTCTTCNNNNNNNTAAGCATGC

ZFN-GI|224589816:C145061904-  
 145030456\_HOMO\_SAPIENS\_CHROMOSOME\_4,\_GRCH37.P2\_PRIMARY\_REFERENCE\_ASSEM  
 BLY-SP-6-4  
 15408 cTCTTCAGCCTCTCA**GTTGCTGTT**c 15433  
 15408 g**GAGAAGTCG**GAGAGTCAACGACAAg 15433

| FINGER   | HELIX   | TRIPLET    | REFERENCE NUMBER | SOURCE |
|----------|---------|------------|------------------|--------|
| Left F1  | KHNSLTR | <b>GAG</b> | -                | CoDA   |
| Left F2  | QQTNLTR | <b>GAA</b> | -                | CoDA   |
| Left F3  | VGNSLTR | <b>GCT</b> | -                | CoDA   |
| Right F1 | QATLLRR | <b>GTT</b> | -                | CoDA   |
| Right F2 | QRSDLTR | <b>GCT</b> | -                | CoDA   |
| Right F3 | IRTSLKR | <b>GTT</b> | -                | CoDA   |

[ZF DNA Sequence](#)

**Blast** CTCTTCAGCNNNNNNGTTGCTGTT

ZFN-GI|224589816:C145061904-  
 145030456\_HOMO\_SAPIENS\_CHROMOSOME\_4,\_GRCH37.P2\_PRIMARY\_REFERENCE\_ASSEM  
 BLY-SP-6-5  
 17540 aGACAGCATCAAGGGG**GATGATGTT**a 17565  
 17540 t**CTGTCGTAG**TCCCCCTACTACAAt 17565

| FINGER   | HELIX    | TRIPLET    | REFERENCE NUMBER | SOURCE |
|----------|----------|------------|------------------|--------|
| Left F1  | TRAVLRR  | <b>GTC</b> | -                | CoDA   |
| Left F2  | QRSDLTR  | <b>GCT</b> | -                | CoDA   |
| Left F3  | LTHNLRR  | <b>GAT</b> | -                | CoDA   |
| Right F1 | TNQUALGV | <b>GTT</b> | -                | CoDA   |
| Right F2 | VRHNLTR  | <b>GAT</b> | -                | CoDA   |
| Right F3 | ISHNLAR  | <b>GAT</b> | -                | CoDA   |

ZF DNA Sequence

Bos taurus (cow) Build 3.1

Blast GACAGCATCNNNNNGATGATGTT

ZFN-GI|224589816:C145061904-  
145030456\_HOMO\_SAPIENS\_CHROMOSOME\_4,\_GRCH37.P2\_PRIMARY\_REFERENCE\_ASSEM  
BLY-SP-7-8  
20865 gAGCCGCTGCTGGGAGG**GATGTGGGA**g 20891  
20865 c**TCGCGACG**ACCCTCCCTACACCCTc 20891

| FINGER   | HELIX   | TRIPLET    | REFERENCE NUMBER | SOURCE |
|----------|---------|------------|------------------|--------|
| Left F1  | KHQTLQR | <b>GCT</b> | -                | CoDA   |
| Left F2  | RTDTLAR | <b>GCG</b> | -                | CoDA   |
| Left F3  | QKGTLGR | <b>GCA</b> | -                | CoDA   |
| Right F1 | THAHLTR | <b>GGA</b> | -                | CoDA   |
| Right F2 | RREVLN  | <b>GTG</b> | -                | CoDA   |
| Right F3 | ISHNLAR | <b>GAT</b> | -                | CoDA   |

ZF DNA Sequence

Bos taurus (cow) Build 3.1

Blast AGCCGCTGCNNNNNNGATGTGGGA

ZFN-GI|224589816:C145061904-  
145030456\_HOMO\_SAPIENS\_CHROMOSOME\_4,\_GRCH37.P2\_PRIMARY\_REFERENCE\_ASSEM  
BLY-SP-7-9  
24774 gTGCTTCAGCCTCCGC**GTAGTTGGG**a 24800  
24774 c**ACGAAGTCG**GAGGCGTCATCAACCct 24800

| FINGER   | HELIX   | TRIPLET    | REFERENCE NUMBER | SOURCE |
|----------|---------|------------|------------------|--------|
| Left F1  | RGQELRR | <b>GCA</b> | -                | CoDA   |
| Left F2  | QQTNLTR | <b>GAA</b> | -                | CoDA   |
| Left F3  | VGNSLTR | <b>GCT</b> | -                | CoDA   |
| Right F1 | KSNHLHV | <b>GGG</b> | -                | CoDA   |
| Right F2 | HKSSLTR | <b>GTT</b> | -                | CoDA   |
| Right F3 | QSTSLQR | <b>GTA</b> | -                | CoDA   |

ZF DNA Sequence

Bos taurus (cow) Build 3.1

Blast TGCTTCAGCNNNNNNGTAGTTGGG

ZFN-GI|224589816:C145061904-  
145030456\_HOMO\_SAPIENS\_CHROMOSOME\_4,\_GRCH37.P2\_PRIMARY\_REFERENCE\_ASSEM  
BLY-SP-7-10  
26726 tCTCCACTCCAGGTGC**TAA**G**CAGAT**a 26752  
26726 a**GAGGTGAGG**GTCCACGATTCGTCTat 26752

| FINGER | HELIX | TRIPLET | REFERENCE NUMBER | SOURCE |
|--------|-------|---------|------------------|--------|
|--------|-------|---------|------------------|--------|

|          |         |            |   |      |
|----------|---------|------------|---|------|
| Left F1  | KHSNLTR | <u>GAG</u> | - | CoDA |
| Left F2  | RREVLEN | <u>GTG</u> | - | CoDA |
| Left F3  | QKPHLSR | <u>GGA</u> | - | CoDA |
| Right F1 | SKQALAV | <u>GAT</u> | - | CoDA |
| Right F2 | QSTTLKR | <u>GCA</u> | - | CoDA |
| Right F3 | QGGNLAL | <u>TAA</u> | - | CoDA |

[ZF DNA Sequence](#)

Bos taurus (cow) Build 3.1

Blast CTCCACTCCNNNNNNTAAGCAGAT

ZFN-GI|224589816:C145061904-  
 145030456\_HOMO\_SAPIENS\_CHROMOSOME\_4,\_GRCH37.P2\_PRIMARY\_REFERENCE\_ASSEM  
 BLY-SP-5-1  
 27940 aGTCTTCGTCCTTTAGAAGCTGAGa 27964  
 27940 tCAGAAGCAGGAAATCTTCGACTCt 27964

| FINGER   | HELIX   | TRIPLET    | REFERENCE NUMBER | SOURCE |
|----------|---------|------------|------------------|--------|
| Left F1  | DEANLRR | <u>GAC</u> | -                | CoDA   |
| Left F2  | QQTNLTR | <u>GAA</u> | -                | CoDA   |
| Left F3  | DMGNLGR | <u>GAC</u> | -                | CoDA   |
| Right F1 | KHSNLTR | <u>GAG</u> | -                | CoDA   |
| Right F2 | QRSDLTR | <u>GCT</u> | -                | CoDA   |
| Right F3 | QRNNLGR | <u>GAA</u> | -                | CoDA   |

[ZF DNA Sequence](#)

Bos taurus (cow) Build 3.1

Blast GTCTTCGTCNNNNNGAAGCTGAG

ZFN-GI|224589816:C145061904-  
 145030456\_HOMO\_SAPIENS\_CHROMOSOME\_4,\_GRCH37.P2\_PRIMARY\_REFERENCE\_ASSEM  
 BLY-SP-7-11  
 28378 gCACCTCACAGAAAACATAGGAAAACa 28404  
 28378 cGTGGAGTGTCTTTTGTATCCTTTTGT 28404

| FINGER   | HELIX   | TRIPLET    | REFERENCE NUMBER | SOURCE |
|----------|---------|------------|------------------|--------|
| Left F1  | RRHILDR | <u>GTG</u> | -                | CoDA   |
| Left F2  | RQDNLGR | <u>GAG</u> | -                | CoDA   |
| Left F3  | QQHGLRH | <u>TGT</u> | -                | CoDA   |
| Right F1 | GASALRQ | <u>AAC</u> | -                | CoDA   |
| Right F2 | QQTNLTR | <u>GAA</u> | -                | CoDA   |
| Right F3 | RRDHLSL | <u>TAG</u> | -                | CoDA   |

[ZF DNA Sequence](#)

Bos taurus (cow) Build 3.1

Blast CACCTCACANNNNNNTAGGAAAAC

+

ZFN-GI|224589816:C145061904-  
145030456\_HOMO\_SAPIENS\_CHROMOSOME\_4,\_GRCH37.P2\_PRIMARY\_REFERENCE\_ASSEM  
BLY-SP-6-6  
31017 tTTCTTCCTAGTTCCTGGAGGCTGGGa 31042  
31017 aAAGAAGGATCAAGACCTCCGACCct 31042
